# Supplementary material
Source: publisher figshare collection journal article supplement (https://gsapubs.figshare.com/articles/dataset/_/24128538)
Supplement: Supplementary file 1 [file 1]

## Sheet: Table S1
TABLE S1. METADATA FOR LASER DATA.
Laboratory and Sample Preparation	Laser Ablation Single Stream (SS)	Laser Ablation Split Stream (LASS)
Laboratory name	Radiogenic Isotope and Geochronology Laboratory (RIGL), Washington State University
Sample type / mineral	Zircon
Sample preparation	Samples disaggregated by electric-pulse disaggregation 1-inch resin mount, polished
Imaging	CL and BSE: JEOL JXA-8500F, 10-12 nA, 15 kV
Laser Ablation System
Make, model and type	Analyte Excite 193-nm ArF Excimer laser	Analyte Excite 193-nm ArF Excimer laser
Ablation cell and volume	HelEx II 2-Volume Cell	HelEx II 2-Volume Cell
Laser wavelength	193 nm	193 nm
Pulse width	5 ns	5 ns
Fluence	5-6 J/cm2	6-7 J/cm2
Repetition rate	8 Hz	10 Hz
Ablation duration	40 s	40 s
Spot diameter	25 μm	40 μm
Sampling mode	Static spot	Static spot
Carrier gas	100% He	100% He, mixed with a small amount of N2 (5 mL/min) using a "Y" split (for Hf analyses)
Cell carrier gas flow	1 L/min	1 L/min
ICP-MS Instrument
Make, model and type	ThermoScientific Element2	ThermoScientific Element2	ThermoScientific Neptune Plus
Sample introduction	Ablation aerosol	Ablation aerosol	Ablation aerosol
RF power	1250 W	1250 W	1250 W
Sample gas flow	~0.7 L/min (Ar)	~0.7 L/min (Ar)	~0.6 L/min (Ar)
Detection system	Discrete dynode electron multiplier	Discrete dynode electron multiplier	Faraday cups
Masses measured	202, 204, 206, 207, 208, 232, 235, 238	202, 204, 206, 207, 208, 232, 235, 238	171, 173, 175, 176, 177, 178, 179, 180, 182
Dwell times	10 ms for each element	10 ms for each element	1.049 s
Total intergration time per output data point	0.11 s	0.11 s	1.1 s
'Sensitivity' as useful yield	1.5×106 cps of 238U for Plešovice	1.5×106 cps of 238U for Plešovice	4V of 177Hf for Plešovice
IC dead time	19 ns	19 ns	Not available
Data Processing
Gas blank	10 s	10 s	10 s
Calibration strategy	Primary RM: Plešovice (bracketing 4 per 10-15 unknowns) 207Pb/206Pb correction RM: FC-1 (bracketing 2 per 10-15 unknowns) Secondary RM: 91500	Primary RM: Plešovice (bracketing 4 per 10-15 unknowns) 207Pb/206Pb correction RM: FC-1 (bracketing 2 per 10-15 unknowns) Secondary RM: 91500	Primary RM: Plešovice (bracketing 4 per 10-15 unknowns) Secondary RM: FC-1, GJ-1, and 91500
Reference material (RM)	Plešovice (206Pb/238U = 0.05368, Sláma et al., 2008) FC-1 (207Pb/206Pb = 0.076149, Paces and Miller Jr, 1993)	Plešovice (206Pb/238U = 0.05368, Sláma et al., 2008) FC-1 (207Pb/206Pb = 0.076149, Paces and Miller Jr, 1993)	Plešovice (176Hf/177Hf = 0.282482, Sláma et al., 2008)
Data processing package used / Correction for LIEF*	VizualAge UcomPbine data reduction scheme (Chew et al., 2014) of Iolite 4.7.1 program for integration selection, background subtraction, isotope ratio and error calculation, downhole correction, and standard normalization IsoplotR (Vermeesch, 2018) for date and error calculation	VizualAge UcomPbine data reduction scheme (Chew et al., 2014) of Iolite 4.7.1 program for integration selection, background subtraction, isotope ratio and error calculation, downhole correction, and standard normalization IsoplotR (Vermeesch, 2018) for date and error calculation	In-house customized Hf isotopes data reduction scheme of Iolite 4.7.1 program for integration selection, background subtraction, isotope ratio and error calculation, and standard normalization
Mass discrimination	Ratios normalized to primary RM	Ratios normalized to primary RM	Ratios normalized to primary RM
Common-Pb correction	No common-Pb correction	No common-Pb correction	Not available
Uncertainty level and propagation	Individual spot: 2s absolute Intercept and weighted mean dates: errors at 95% confidence level (propagation of RM reproducibility by quadratic addition)	Individual spot: 2s absolute Intercept and weighted mean dates: errors at 95% confidence level (propagation of RM reproducibility by quadratic addition)	Individual spot: 2s absolute
Quality control	91500 (207Pb/206Pb age = 1065.4 Ma, Wiedenbeck, 1995)	GJ-1 (206Pb/238U age = 600 Ma, Jackson et al., 2004) 91500 (207Pb/206Pb age = 1065.4 Ma, Wiedenbeck, 1995)	FC-1 (176Hf/177Hf = 0.282482, Woodhead and Hergt, 2005) GJ-1 (176Hf/177Hf = 0.282200, Morel et al., 2008) 91500 (176Hf/177Hf = 0.282305, Blichert-Toft, 2008)
*LIEF—laser-induced elemental fractionation.

## Sheet: Table S2
TABLE S2. SUMMARY OF U-PB ISOTOPE FOR ZIRCON REFERENCE MATERIALS
				Data for Tera-Wasserburg Plot						Data for Wetherill Plot						Date						Discordance (%)
Standard		Th/U		238U/206Pb	1se (%)	207Pb/206Pb	1se (%)	Rho7/6-8/6		207Pb/235U	1se (%)	206Pb/238U	1se (%)	Rho6/8-7/5		207Pb/235U date (Ma)	2se	206Pb/238U date (Ma)	2se	207Pb/206Pb date (Ma)	2se
2021 June zircon laser ablation single-stream analysis
Plešovice (primary reference material)
PL-1		0.103332		18.6622	0.218072	0.0531601	0.417916	0.257007		0.393279	0.412312	0.0536696	0.217413	0.288467		336.47	2.36	336.49	1.41	336.32	18.65	-0.0505471
PL-2		0.103288		18.6512	0.231526	0.0537839	0.428886	0.289619		0.394825	0.4185	0.0536724	0.234485	0.270704		339.86	2.41	336.68	1.48	361.67	19.01	6.90961
PL-3		0.10338		18.6295	0.218789	0.0534259	0.405734	0.126245		0.394672	0.437067	0.0537427	0.224182	0.386443		338.05	2.48	337.06	1.42	344.81	18.18	2.24761
PL-4		0.103236		18.6647	0.210722	0.0531696	0.370854	0.131445		0.393331	0.405698	0.0536385	0.211321	0.405507		336.43	2.25	336.45	1.35	336.32	16.43	-0.0386537
PL-5		0.103271		18.6423	0.230401	0.0533391	0.414811	0.200224		0.393925	0.438396	0.0536938	0.229105	0.347077		337.31	2.41	336.84	1.48	340.57	18.19	1.09522
PL-6		0.103354		18.6613	0.225316	0.0535087	0.400055	0.34437		0.394159	0.38792	0.0536706	0.221987	0.237031		338.1	2.18	336.51	1.48	349.04	17.72	3.58985
PL-7		0.103239		18.6865	0.237029	0.0530057	0.361166	0.295271		0.393075	0.368287	0.0536374	0.237913	0.310798		335.02	2.06	336.06	1.54	327.78	16.01	-2.52608
PL-8		0.103402		18.6244	0.214282	0.0533075	0.365758	0.250785		0.395025	0.375304	0.053719	0.210369	0.334904		337.59	2.12	337.15	1.35	340.57	16.42	1.0042
PL-9		0.103147		18.6784	0.237182	0.0531843	0.354925	0.21974		0.392875	0.383177	0.0535797	0.2349	0.403908		336.22	2.12	336.21	1.54	336.32	15.54	0.0327069
PL-10		0.10356		18.632	0.205222	0.0534064	0.408602	0.242775		0.395288	0.416976	0.0537561	0.206596	0.266322		338.01	2.33	337.02	1.35	344.81	18.18	2.25922
PL-11		0.103048		18.6643	0.213623	0.053189	0.392021	0.297898		0.393625	0.38821	0.0536335	0.220231	0.352537		336.44	2.15	336.45	1.35	336.32	17.32	-0.0386537
PL-12		0.103542		18.6241	0.222548	0.0531655	0.361506	0.286304		0.394288	0.36011	0.0537247	0.223263	0.34762		337.05	2.05	337.16	1.42	336.32	15.99	-0.249762
PL-13		0.102886		18.6603	0.220061	0.0533249	0.373615	0.233282		0.393586	0.387975	0.0535993	0.22341	0.387738		337.04	2.16	336.52	1.41	340.57	16.42	1.18918
PL-14		0.103581		18.6146	0.198991	0.0533382	0.37742	0.313989		0.394376	0.36749	0.0537107	0.201449	0.239256		337.74	2.08	337.33	1.29	340.57	16.86	0.951346
PL-15		0.103281		18.6344	0.223942	0.0531853	0.405345	0.304952		0.394242	0.396	0.0537141	0.218665	0.239078		336.89	2.26	336.98	1.42	336.32	18.21	-0.196242
PL-16		0.103308		18.6568	0.189727	0.0532423	0.379324	0.186687		0.393749	0.39105	0.0536681	0.190174	0.337502		336.55	2.2	336.58	1.22	336.32	16.88	-0.0773073
PL-17		0.10336		18.6551	0.218234	0.052992	0.374041	0.246866		0.39355	0.389956	0.0536767	0.215992	0.319528		335.5	2.13	336.61	1.41	327.78	16.46	-2.69388
PL-18		0.10325		18.6564	0.208597	0.0532648	0.367905	0.298996		0.394427	0.362288	0.0536889	0.207357	0.252108		337.1	2.06	336.59	1.35	340.57	16.42	1.16863
PL-19		0.103391		18.6706	0.22052	0.0534925	0.357743	0.433954		0.394017	0.377891	0.0536555	0.219492	0.139986		337.95	1.86	336.34	1.41	349.04	15.95	3.63855
PL-20		0.103215		18.6566	0.223666	0.0534384	0.362069	0.245098		0.393885	0.370645	0.0537007	0.222004	0.344652		337.63	2.1	336.59	1.41	344.81	15.96	2.38392
PL-21		0.103525		18.6623	0.228183	0.0534979	0.381125	0.22133		0.395249	0.414528	0.0537044	0.232322	0.496122		338.08	2.24	336.49	1.48	349.04	16.84	3.59558
PL-22		0.102959		18.6704	0.220702	0.0531081	0.375161	0.282153		0.392994	0.379477	0.0536613	0.219509	0.285218		335.8	2.14	336.35	1.41	332.05	16.89	-1.29499
PL-23		0.103352		18.6738	0.226012	0.0533979	0.373896	0.190553		0.393816	0.410087	0.0536277	0.224414	0.393527		337.37	2.23	336.29	1.48	344.81	16.41	2.47093
PL-24		0.103289		18.6426	0.207814	0.0534226	0.372653	0.273613		0.394227	0.377679	0.053728	0.207449	0.281938		337.85	2.1	336.83	1.35	344.81	16.41	2.31432
PL-25		0.103277		18.6757	0.226236	0.053326	0.38107	0.210094		0.393655	0.392827	0.0536165	0.223732	0.363131		336.8	2.25	336.25	1.48	340.57	16.86	1.26846
PL-26		0.10335		18.6322	0.207848	0.053147	0.367819	0.114259		0.394361	0.413106	0.0537347	0.209671	0.397971		336.39	2.27	337.02	1.35	332.05	16.44	-1.49676
PL-27		0.103321		18.6779	0.215858	0.05357	0.360591	0.466856		0.394085	0.372592	0.0536721	0.223611	0.136961		338.38	1.82	336.21	1.41	353.26	15.94	4.82647
PL-28		0.103285		18.652	0.19743	0.0534184	0.359134	0.228622		0.393901	0.365139	0.0536833	0.199008	0.333761		337.7	2.08	336.67	1.29	344.81	15.96	2.36072
PL-29		0.10344		18.6695	0.200086	0.0534792	0.362551	0.249287		0.393742	0.368539	0.0536508	0.201402	0.303099		337.97	2.06	336.36	1.28	349.04	15.95	3.63282
PL-30		0.103133		18.6307	0.204437	0.0534758	0.383801	0.262855		0.394351	0.385247	0.0537173	0.211983	0.285971		338.57	2.14	337.04	1.29	349.04	16.84	3.438
PL-31		0.103294		18.6796	0.234155	0.0534035	0.367534	0.201995		0.393149	0.400039	0.0536149	0.232849	0.392551		337.28	2.22	336.18	1.48	344.81	16.41	2.50283
PL-32		0.103344		18.6326	0.207521	0.0535847	0.347711	0.208959		0.39473	0.372379	0.0537293	0.210301	0.388573		339.08	2.08	337.01	1.35	353.26	15.5	4.60001
PL-33		0.103442		18.6355	0.208604	0.0536106	0.354574	0.308209		0.394075	0.354598	0.0537187	0.206295	0.298813		339.03	1.97	336.96	1.35	353.26	15.5	4.61417
PL-34		0.103135		18.6716	0.217528	0.0537082	0.362872	0.227799		0.394184	0.38367	0.0536599	0.216293	0.358744		339.01	2.13	336.32	1.41	357.47	15.93	5.91658
PL-35		0.103374		18.6789	0.197512	0.053394	0.347154	0.177926		0.392832	0.370536	0.0536053	0.199469	0.393224		337.29	2.09	336.2	1.28	344.81	15.52	2.49703
PL-36		0.103263		18.63	0.191522	0.0537549	0.369119	0.203424		0.3953	0.377526	0.0537558	0.190362	0.309692		340.19	2.15	337.06	1.22	361.67	16.36	6.80455
PL-37		0.10314		18.682	0.214106	0.0537647	0.343075	0.243795		0.393372	0.362022	0.0536095	0.210834	0.369483		339.39	2	336.14	1.35	361.67	15.03	7.05892
PL-38		0.103466		18.6107	0.202538	0.0536254	0.356577	0.213491		0.394588	0.378968	0.0537369	0.204963	0.356171		339.42	2.11	337.4	1.29	353.26	15.94	4.48961
PL-39		0.103239		18.6437	0.215243	0.0538395	0.360263	0.239911		0.394134	0.371825	0.0537045	0.219424	0.368884		339.98	2.12	336.81	1.42	361.67	15.92	6.87367
PL-40		0.103445		18.6641	0.215064	0.05401	0.38035	0.28834		0.393852	0.370483	0.0536544	0.21821	0.299044		340.74	2.16	336.46	1.41	370.04	16.78	9.07469
PL-41		0.103263		18.6597	0.222497	0.0536367	0.376656	0.285323		0.394308	0.390325	0.053691	0.221721	0.472775		338.66	2.15	336.53	1.41	353.26	16.83	4.73589
PL-42		0.103336		18.6584	0.192212	0.0533912	0.376703	0.206307		0.39367	0.390146	0.0536716	0.19504	0.307571		337.6	2.19	336.56	1.22	344.81	16.85	2.39262
PL-43		0.10333		18.6533	0.208667	0.0536116	0.35747	0.272011		0.394278	0.361012	0.0537029	0.20832	0.322232		338.76	2.06	336.65	1.35	353.26	15.94	4.70192
PL-44		0.103285		18.6709	0.211481	0.053467	0.364229	0.186256		0.393727	0.382147	0.0536559	0.211347	0.388504		337.95	2.15	336.34	1.35	349.04	15.95	3.63855
PL-45		0.103236		18.6528	0.227195	0.0532551	0.3659	0.254623		0.394053	0.379588	0.0537188	0.225443	0.338721		337.15	2.15	336.65	1.48	340.57	16.42	1.15101
PL-46		0.103459		18.6663	0.209551	0.0536144	0.390825	0.269999		0.393866	0.392178	0.0536441	0.206545	0.280368		338.56	2.2	336.42	1.35	353.26	17.27	4.76703
PL-47		0.102919		18.6324	0.208256	0.0537118	0.367343	0.194751		0.395358	0.388153	0.0537487	0.210757	0.395921		339.62	2.2	337.01	1.35	357.47	16.37	5.72356
PL-48		0.103476		18.6785	0.217026	0.053246	0.401308	0.265513		0.39253	0.408163	0.053612	0.219845	0.281778		336.22	2.26	336.2	1.41	336.32	17.76	0.0356803
PL-49		0.103035		18.6622	0.260599	0.0538033	0.402638	0.19381		0.394516	0.428165	0.0536474	0.266683	0.433659		339.69	2.45	336.49	1.67	361.67	17.68	6.96215
PL-50		0.10348		18.6311	0.24188	0.0534562	0.419898	0.188063		0.393482	0.453149	0.0537133	0.237607	0.398427		338.56	2.5	337.04	1.54	349.04	18.61	3.438
PL-51		0.103333		18.6949	0.259635	0.0540257	0.425242	0.288864		0.394349	0.428626	0.0536132	0.255943	0.344284		340.26	2.46	335.92	1.67	370.04	18.98	9.22062
PL-52		0.103304		18.6355	0.263032	0.0529866	0.394216	0.215781		0.393805	0.421605	0.053745	0.259158	0.414101		335.8	2.35	336.96	1.67	327.78	17.35	-2.80066
PL-53		0.103201		18.6598	0.258493	0.0535442	0.404319	0.253734		0.39278	0.433131	0.053672	0.261051	0.396064		338.12	2.36	336.53	1.67	349.04	17.72	3.58412
Mean values ± 2sd				18.6547	0.0396413	0.053438	0.000486748			0.393991	0.00132502	0.0536787	9.12621e-05					336.622	0.696998	346.298	20.454
FC1 (207Pb/206Pb correction reference material)
FC1-1		0.605804		5.27237	0.312399	0.0763863	0.259595	0.178784		1.962	0.348092	0.1901	0.304755	0.724093		1114.52	4.87	1119.57	6.24	1104.67	10.19	-1.34882
FC1-2		0.629233		5.19515	0.242294	0.0759007	0.249478	0.217021		2.02955	0.319772	0.192732	0.246354	0.521405		1120.06	4.08	1134.82	4.89	1091.53	9.81	-3.96599
FC1-3		0.609813		5.21103	0.247701	0.0761216	0.243364	0.290421		2.00975	0.293031	0.192223	0.241738	0.611983		1119.79	3.88	1131.67	5.09	1096.8	9.41	-3.17925
FC1-4		0.620146		5.21555	0.244538	0.0761052	0.241875	0.301516		2.00256	0.28298	0.192047	0.242993	0.611172		1119.2	3.77	1130.77	4.88	1096.8	9.41	-3.09719
FC1-5		0.596312		5.36936	0.264147	0.0761551	0.236729	0.381113		1.95414	0.288029	0.186686	0.260023	0.623851		1100.46	3.67	1100.98	5.16	1099.43	9.41	-0.140982
FC1-6		0.606326		5.26658	0.250369	0.0762045	0.245046	0.202683		2.00564	0.303545	0.19033	0.250753	0.646386		1113.49	4.18	1120.7	5.04	1099.43	9.8	-1.93464
FC1-7		0.555828		5.42524	0.248875	0.0763478	0.240412	0.368487		1.9507	0.286998	0.184498	0.249069	0.611928		1094.4	3.62	1090.56	4.92	1102.05	9.41	1.0426
FC1-8		0.596703		5.21178	0.284491	0.0760977	0.243071	0.333397		2.01533	0.308421	0.191805	0.29665	0.684761		1119.68	4.01	1131.51	5.7	1096.8	9.41	-3.16466
FC1-9		0.610132		5.31602	0.254205	0.0759412	0.244372	0.337933		1.95698	0.286904	0.18822	0.262974	0.637962		1104.53	3.72	1111.14	5	1091.53	9.42	-1.79656
FC1-10		0.551618		5.38554	0.250559	0.0761905	0.233244	0.259118		1.95097	0.287001	0.186074	0.244913	0.662408		1098.45	3.85	1097.95	4.95	1099.43	9.02	0.134615
FC1-11		0.563068		5.32286	0.247471	0.076147	0.254466	0.37892		1.99211	0.27924	0.188255	0.244099	0.58021		1105.43	3.68	1109.81	5	1096.8	9.81	-1.18618
FC1-12		0.549907		5.36143	0.250623	0.0761241	0.235021	0.321803		1.95343	0.291154	0.186786	0.258591	0.638148		1100.58	3.76	1102.49	4.97	1096.8	9.41	-0.518782
FC1-13		0.556875		5.39363	0.239859	0.0763098	0.239182	0.342007		1.96273	0.269395	0.18554	0.229669	0.588936		1098.32	3.62	1096.43	4.74	1102.05	9.41	0.509959
FC1-15		0.614064		5.26588	0.258606	0.0760878	0.214948	0.3401		1.99144	0.280089	0.19026	0.255446	0.650502		1112.69	3.62	1120.84	5.24	1096.8	8.24	-2.19183
FC1-16		0.605875		5.36261	0.279064	0.0760798	0.356301	0.785514		1.96634	0.444712	0.187126	0.317027	-0.0306129		1100.43	2.93	1102.26	5.56	1096.8	14.12	-0.497812
FC1-23		0.620724		5.26527	0.390279	0.0759868	0.308342	0.342404		1.97056	0.419143	0.190184	0.383961	0.675432		1111.88	5.39	1120.96	7.86	1094.17	12.17	-2.44843
FC1-24		0.622481		5.21059	0.382928	0.0761773	0.31183	0.382434		2.0378	0.383696	0.192445	0.382023	0.666823		1120.73	5.16	1131.75	7.73	1099.43	12.16	-2.93971
FC1-25		0.698675		5.30139	0.27688	0.0763718	0.237316	0.325114		1.97494	0.320868	0.188767	0.289766	0.69451		1110.81	4.02	1113.95	5.61	1104.67	9.4	-0.84007
FC1-26		0.696712		5.34712	0.252391	0.0760203	0.222282	0.284802		2.01646	0.287393	0.187363	0.255885	0.689088		1101.49	3.72	1105.2	4.98	1094.17	8.63	-1.00807
FC1-27		0.671076		5.19667	0.321919	0.0761627	0.30285	0.401243		1.8526	0.378344	0.192427	0.346567	0.658401		1122.54	4.52	1134.52	6.52	1099.43	11.76	-3.19165
Mean values ± 2sd				5.2948	0.147598	0.0761459	0.000267217			1.9778	0.0812626	0.189193	0.00520655					1115.39	28.5092	1097.98	7.32894
91500
91500-1		0.373634		5.66125	0.284641	0.0747414	0.556779	0.188687		1.7981	0.564108	0.177222	0.284765	0.313369		1052.15	7.41	1048.6	5.31	1059.54	22.09	1.03252
91500-2		0.38125		5.61148	0.363856	0.0740659	0.63639	0.0234468		1.83101	0.669267	0.179049	0.370563	0.555719		1052.65	9.34	1057.16	6.88	1043.28	25.31	-1.33042
91500-3		0.381667		5.58015	0.348993	0.0750993	0.576762	0.101926		1.8528	0.60434	0.179568	0.340274	0.527425		1065.14	8.35	1062.63	6.72	1070.28	22.84	0.714766
91500-4		0.385266		5.61856	0.271089	0.075424	0.570347	0.21756		1.84609	0.570818	0.178183	0.276521	0.334045		1063.24	7.43	1055.93	5.15	1078.28	22.42	2.07275
91500-5		0.375475		5.72072	0.272606	0.0760618	0.537155	0.285858		1.83223	0.527117	0.175183	0.268877	0.228729		1057.47	6.83	1038.52	5.08	1096.8	21.18	5.31364
91500-6		0.381974		5.687	0.272608	0.0753389	0.518805	0.134957		1.83906	0.561096	0.176201	0.273132	0.369944		1054.42	7.1	1044.21	5.1	1075.62	20.46	2.92018
91500-7		0.34557		5.69884	0.427124	0.0745874	0.655616	0.289118		1.81559	0.682275	0.17619	0.42285	0.380498		1046.94	8.65	1042.21	8.11	1056.84	26.05	1.38432
91500-8		0.370958		5.63847	0.301608	0.0756905	0.539132	0.217639		1.8519	0.543398	0.177911	0.295386	0.335973		1063.53	7.21	1052.49	5.71	1086.25	21.22	3.10794
91500-9		0.376609		5.66663	0.287431	0.0745749	0.544406	0.222671		1.81286	0.558524	0.176752	0.286456	0.307345		1050.65	7.1	1047.68	5.5	1056.84	21.31	0.866735
91500-10		0.364414		5.71471	0.290191	0.0752744	0.556273	0.303082		1.81335	0.535949	0.175432	0.292117	0.229492		1051.23	7.02	1039.53	5.46	1075.62	22.04	3.35527
91500-11		0.377839		5.69492	0.274366	0.0752727	0.48528	0.228503		1.83305	0.499614	0.175704	0.280156	0.34814		1053.51	6.46	1042.87	5.1	1075.62	19.28	3.04476
91500-12		0.355956		5.69534	0.284656	0.0747849	0.501034	0.237893		1.81138	0.534808	0.175925	0.288803	0.326962		1049.1	6.56	1042.8	5.28	1062.23	19.72	1.82917
91500-13		0.356389		5.73617	0.279806	0.075046	0.52856	0.261112		1.81415	0.529514	0.174736	0.275583	0.268091		1046.17	6.79	1035.93	5.25	1067.6	20.88	2.96647
91500-14		0.368012		5.53388	0.305311	0.0756733	0.510371	0.206229		1.88293	0.530375	0.181117	0.30436	0.365573		1075.91	7.01	1070.82	5.99	1086.25	20.04	1.42048
91500-15		0.386355		5.66275	0.282525	0.0747784	0.54056	0.22279		1.82319	0.563392	0.176974	0.285242	0.300807		1052.85	7.07	1048.34	5.31	1062.23	21.29	1.30763
91500-16		0.376013		5.7262	0.278606	0.0741515	0.483433	0.22973		1.77963	0.494535	0.175107	0.275937	0.330058		1040.31	6.34	1037.6	5.26	1046.01	18.97	0.804008
91500-17		0.374045		5.62779	0.303939	0.0745495	0.520575	0.209133		1.81225	0.559955	0.178124	0.310489	0.364805		1054.27	6.98	1054.34	5.72	1054.14	20.53	-0.0189728
91500-18		0.371133		5.73332	0.284406	0.0757657	0.524956	0.260742		1.80652	0.538956	0.174929	0.288474	0.284015		1053.44	6.71	1036.42	5.25	1088.89	20.42	4.81867
91500-19		0.340336		5.61084	0.504981	0.074944	0.664687	0.293544		1.8373	0.722465	0.178913	0.504458	0.433279		1059.78	9.04	1057.29	9.56	1064.91	26.01	0.715553
91500-20		0.354269		5.65456	0.291835	0.0752212	0.52742	0.302601		1.80823	0.513388	0.177282	0.281123	0.244331		1057.29	6.72	1049.73	5.51	1072.95	20.86	2.16413
91500-21		0.360564		5.65799	0.275617	0.0756187	0.48113	0.176922		1.84234	0.514647	0.177285	0.274243	0.373678		1060.39	6.59	1049.15	5.31	1083.6	18.87	3.17922
91500-22		0.367053		5.68108	0.279824	0.0755922	0.533416	0.297576		1.83147	0.526228	0.176291	0.290358	0.251662		1057.71	6.7	1045.21	5.3	1083.6	20.83	3.54282
91500-23		0.361635		5.61815	0.297006	0.0756521	0.533801	0.210475		1.8397	0.545274	0.17854	0.292788	0.332487		1065.91	7.13	1056	5.73	1086.25	20.82	2.78481
91500-24		0.365179		5.57572	0.303072	0.0753534	0.524882	0.197373		1.86763	0.5545	0.17958	0.298152	0.386859		1068.3	7.08	1063.42	5.76	1078.28	20.45	1.37812
91500-25		0.403323		5.6191	0.298206	0.0749202	0.530184	0.171285		1.83637	0.575556	0.178364	0.305589	0.368331		1058.81	7.25	1055.84	5.73	1064.91	20.89	0.851715
91500-26		0.405104		5.64537	0.289034	0.0757392	0.50201	0.147446		1.8748	0.535818	0.177327	0.286621	0.42978		1062.72	6.97	1051.31	5.51	1086.25	19.64	3.21657
91500-27		0.400197		5.60693	0.274839	0.0748357	0.513286	0.242902		1.73319	0.52233	0.178592	0.27395	0.303718		1059.36	6.65	1057.96	5.16	1062.23	20.11	0.401985
Mean values ± 2sd				5.65474	0.104188	0.0751392	0.0010229			1.82693	0.0599482	0.177277	0.00328207					1049.78	17.8878	1071.31	27.5436
2021 September zircon laser ablatiob split-stream analysis
Plešovice (primary reference material)
PL-1		0.103303		18.638	0.228442	0.0536231	0.609461	0.164236		0.394067	0.614698	0.0537117	0.226674	0.21727		338.99	3.48	336.92	1.48	353.26	27.01	4.62549
PL-2		0.103323		18.6589	0.240441	0.0535183	0.709398	0.206761		0.393758	0.696852	0.0536618	0.245527	0.137172		338.13	3.95	336.55	1.54	349.04	31.46	3.57839
PL-3		0.103254		18.658	0.278116	0.0585241	0.994468	0.195077		0.394546	0.954099	0.0536853	0.27257	0.101917		364.68	5.85	336.56	1.8	547.56	42.38	38.5346
PL-4		0.103401		18.6624	0.276338	0.0532924	0.652574	0.261204		0.394387	0.670374	0.0536773	0.266843	0.179819		337	3.58	336.49	1.8	340.57	28.85	1.19799
PL-5		0.103377		18.6719	0.26952	0.0535483	0.72528	0.18829		0.394114	0.730073	0.0536893	0.26952	0.1914		337.93	4.11	336.32	1.73	349.04	32.35	3.64428
PL-6		0.103199		18.6585	0.23128	0.0554505	0.672961	0.192502		0.394189	0.684963	0.0536715	0.229326	0.136094		348.83	3.85	336.55	1.48	431.42	29.26	21.9902
PL-7		0.103328		18.6444	0.261037	0.0533755	0.702068	0.230307		0.393933	0.672823	0.0536953	0.258207	0.15398		337.82	3.88	336.8	1.67	344.81	31.04	2.32302
PL-8		0.103335		18.6722	0.245878	0.0535584	0.657099	0.151255		0.394044	0.669745	0.0536678	0.247286	0.217103		338.46	3.78	336.31	1.61	353.26	29.22	4.79817
PL-9		0.103317		18.6451	0.241806	0.0527277	0.682984	0.158373		0.394305	0.680055	0.0536762	0.232528	0.190693		334.03	3.82	336.79	1.54	314.88	30.32	-6.95821
PL-10		0.103354		18.6456	0.256321	0.0534874	0.682976	0.16429		0.394144	0.698205	0.0536854	0.257244	0.228073		338.34	3.87	336.78	1.67	349.04	30.13	3.51249
PL-11		0.10328		18.6507	0.225865	0.0531224	0.657092	0.250572		0.393878	0.638046	0.0536721	0.228435	0.0909729		336.11	3.6	336.69	1.48	332.05	29.33	-1.39738
PL-12		0.103364		18.653	0.231566	0.0553509	0.835107	0.131784		0.394266	0.822005	0.0536903	0.236298	0.159161		348.39	4.86	336.65	1.48	427.4	36.71	21.233
PL-13		0.103281		18.681	0.234417	0.0537239	0.637918	0.238546		0.393909	0.640065	0.0536476	0.232519	0.152546		338.87	3.54	336.16	1.48	357.47	28.32	5.96134
PL-14		0.103343		18.6506	0.234001	0.0534125	0.673807	0.177692		0.394076	0.673314	0.0537166	0.231833	0.178872		337.72	3.76	336.69	1.48	344.81	29.71	2.35492
PL-15		0.103203		18.6574	0.210958	0.0537704	0.642398	0.182954		0.393937	0.636027	0.0536446	0.212413	0.144278		339.77	3.6	336.57	1.35	361.67	28.3	6.94003
PL-16		0.103283		18.6343	0.238874	0.0532003	0.669829	0.190094		0.394141	0.675171	0.0537232	0.234275	0.167851		336.9	3.75	336.98	1.54	336.32	29.76	-0.196242
PL-17		0.103239		18.6679	0.232308	0.0554182	0.672313	0.206379		0.393869	0.668724	0.0536648	0.236306	0.185513		348.15	3.82	336.39	1.48	427.4	29.28	21.2939
PL-18		0.103064		18.6651	0.253124	0.0583629	0.872758	0.0726888		0.394367	0.875228	0.0536919	0.250461	0.22561		364.04	5.32	336.44	1.61	543.82	37.27	38.1339
PL-19		0.103307		18.6369	0.199127	0.0545656	0.678744	0.162492		0.394107	0.684573	0.0537111	0.202892	0.150261		344.37	3.87	336.93	1.29	394.87	29.89	14.6732
PL-20		0.10329		18.6635	0.234292	0.0569161	0.662895	0.335851		0.394318	0.633657	0.0536598	0.229948	0.0261338		356.17	3.66	336.47	1.48	486.67	28.55	30.8628
PL-21		0.103299		18.6535	0.242479	0.0532121	0.640706	0.0779373		0.393839	0.671605	0.0536868	0.242504	0.274691		336.6	3.74	336.64	1.54	336.32	28.42	-0.0951475
PL-22		0.103365		18.6546	0.239539	0.0537008	0.667061	0.13543		0.394266	0.677054	0.0536764	0.247292	0.216773		339.27	3.85	336.62	1.54	357.47	29.64	5.83266
PL-23		0.103284		18.6593	0.266321	0.0547485	0.577668	0.0721796		0.394005	0.653121	0.0536565	0.25778	0.440566		344.56	3.56	336.54	1.74	398.97	25.48	15.6478
PL-24		0.103131		18.6536	0.262484	0.0616628	0.615835	0.13379		0.395174	0.687834	0.0536868	0.265278	0.337845		381.37	3.98	336.64	1.67	662.76	26.04	49.2063
PL-25		0.103351		18.6692	0.202582	0.0530772	0.608272	0.227388		0.393748	0.591099	0.0536532	0.2018	0.126939		335.82	3.35	336.37	1.28	332.05	27.11	-1.30101
PL-26		0.103288		18.6437	0.268603	0.0532316	0.582614	0.21343		0.394104	0.595915	0.0537268	0.270961	0.261255		336.75	3.29	336.81	1.74	336.32	25.76	-0.145695
PL-27		0.103262		18.6706	0.296659	0.055993	0.559537	0.245618		0.394253	0.570955	0.0537025	0.298285	0.266254		351.3	3.3	336.34	1.93	451.37	24.37	25.4846
PL-28		0.103065		18.6657	0.203138	0.0530729	0.552254	0.235127		0.393555	0.545632	0.0536638	0.202125	0.119646		335.88	3.02	336.43	1.28	332.05	24.44	-1.31908
PL-29		0.103291		18.6572	0.208844	0.0614874	0.659938	0.115596		0.395375	0.711988	0.0536931	0.207261	0.143547		380.28	4.16	336.58	1.35	655.8	27.75	48.6764
PL-30		0.103283		18.6618	0.216584	0.0535681	0.608789	0.178359		0.393875	0.607391	0.0536666	0.215646	0.149182		338.62	3.45	336.5	1.41	353.26	27.01	4.74438
PL-31		0.103245		18.6574	0.227334	0.0529265	0.589529	0.233549		0.394175	0.573794	0.0537089	0.225332	0.132749		334.92	3.25	336.57	1.48	323.49	26.26	-4.0434
PL-32		0.103323		18.6534	0.211929	0.0542047	0.570518	0.051151		0.393957	0.593184	0.0536727	0.212531	0.31653		341.97	3.4	336.64	1.35	378.36	25.13	11.0265
PL-33		0.103309		18.6655	0.222737	0.0533732	0.536912	0.165482		0.393978	0.551059	0.0536817	0.220984	0.238396		337.49	3.09	336.43	1.41	344.81	23.95	2.43032
PL-34		0.103301		18.6596	0.221054	0.0536307	0.58499	0.287564		0.394044	0.564523	0.0536806	0.223013	0.116182		338.66	3.15	336.54	1.41	353.26	25.68	4.73306
PL-35		0.103357		18.6412	0.203975	0.0529558	0.631061	0.138574		0.393955	0.633385	0.053685	0.202331	0.169169		335.71	3.55	336.86	1.29	327.78	28.02	-2.77015
PL-36		0.103305		18.6627	0.204573	0.053788	0.637523	0.227359		0.39404	0.620956	0.0536744	0.205186	0.109835		339.68	3.54	336.48	1.29	361.67	28.3	6.96491
PL-37		0.103317		18.6562	0.211184	0.0535659	0.602971	0.251899		0.393989	0.587842	0.0536806	0.210242	0.103004		338.71	3.29	336.59	1.35	353.26	26.57	4.7189
PL-38		0.103318		18.6578	0.215232	0.0535104	0.629384	0.134309		0.393998	0.633825	0.0536802	0.213635	0.212892		338.15	3.6	336.57	1.41	349.04	27.92	3.57266
PL-39		0.103306		18.6417	0.201891	0.0531404	0.594493	0.200661		0.39401	0.58056	0.0536803	0.198683	0.14232		336.24	3.27	336.85	1.29	332.05	26.22	-1.44557
PL-40		0.103294		18.6536	0.201609	0.0529121	0.543677	0.132045		0.393975	0.550417	0.0536793	0.199257	0.261551		334.98	3.08	336.64	1.29	323.49	24.04	-4.06504
PL-41		0.103498		18.6381	0.221372	0.0536134	0.601243	0.269984		0.393657	0.580875	0.053689	0.22445	0.119919		338.99	3.28	336.91	1.42	353.26	26.57	4.62832
PL-42		0.103085		18.6716	0.247358	0.053247	0.670122	0.230641		0.39405	0.654681	0.0536685	0.243534	0.159607		336.32	3.7	336.32	1.61	336.32	29.76	0
PL-43		0.103364		18.6451	0.197711	0.0531872	0.520712	0.208791		0.393756	0.513877	0.0536836	0.196928	0.142569		336.73	2.9	336.79	1.29	336.32	23.09	-0.139748
PL-44		0.102925		18.6522	0.196811	0.0578515	0.557851	0.158227		0.394581	0.592248	0.0536812	0.198664	0.2056		361.62	3.36	336.67	1.29	524.99	24.07	35.8712
PL-45		0.103185		18.6608	0.196279	0.0534216	0.575333	0.197177		0.393956	0.57134	0.0536417	0.19675	0.144873		337.57	3.24	336.51	1.29	344.81	25.72	2.40712
PL-46		0.103381		18.641	0.182432	0.0531479	0.564042	0.289296		0.393729	0.54158	0.0537178	0.183408	0.0341419		336.25	3.01	336.86	1.16	332.05	24.89	-1.44858
PL-47		0.103268		18.6366	0.203184	0.0675031	0.633338	-0.0330665		0.396883	0.728817	0.0536758	0.202376	0.29211		411.14	4.42	336.94	1.29	852.31	25.66	60.4674
PL-48		0.10331		18.6287	0.20276	0.0536261	0.536807	0.163077		0.393491	0.579013	0.0536833	0.196869	0.193835		339.14	3.08	337.08	1.29	353.26	23.91	4.5802
PL-49		0.103323		18.6613	0.217132	0.0539336	0.56548	0.122521		0.394366	0.582676	0.0536898	0.217408	0.262784		340.24	3.32	336.51	1.41	365.86	25.18	8.02219
PL-50		0.103293		18.6736	0.27629	0.053552	0.61279	0.190081		0.393813	0.616708	0.0536951	0.278169	0.301555		338.44	3.5	336.29	1.8	353.26	27.01	4.80383
PL-51		0.103295		18.6516	0.197449	0.0548436	0.636328	-0.0714203		0.394122	0.646683	0.0536646	0.199029	0.365775		345.21	3.92	336.68	1.29	403.07	28.09	16.4711
PL-52		0.103326		18.6483	0.197607	0.052912	0.623958	0.237486		0.393904	0.619548	0.0536951	0.199781	0.0830762		335.06	3.38	336.73	1.29	323.49	27.6	-4.09286
PL-53		0.103299		18.6563	0.191332	0.0533437	0.52481	0.151384		0.393997	0.524524	0.0536642	0.190334	0.205374		337.1	2.96	336.59	1.22	340.57	23.08	1.16863
PL-54		0.103305		18.6421	0.178268	0.0533657	0.525673	0.145232		0.394036	0.519235	0.0536942	0.175802	0.201805		337.85	3.01	336.84	1.16	344.81	23.5	2.31142
PL-55		0.103387		18.6639	0.212629	0.0533305	0.584815	0.17685		0.393962	0.57595	0.0536576	0.210153	0.180977		336.98	3.26	336.46	1.35	340.57	25.74	1.2068
PL-56		0.10333		18.6432	0.210372	0.0531939	0.588256	0.138026		0.394039	0.589699	0.0537023	0.210651	0.214797		336.76	3.36	336.82	1.35	336.32	26.2	-0.148668
PL-57		0.103071		18.6345	0.196581	0.0529996	0.497652	0.177252		0.394	0.502346	0.0536824	0.192086	0.210874		335.81	2.83	336.98	1.29	327.78	22.24	-2.80676
PL-58		0.103355		18.6484	0.185876	0.0530581	0.515056	0.147798		0.393949	0.509501	0.05367	0.1907	0.197218		336.14	2.95	336.73	1.22	332.05	23.11	-1.40943
PL-59		0.103247		18.6467	0.237092	0.0539053	0.595852	0.211061		0.393743	0.576316	0.0537511	0.238127	0.183906		340.47	3.39	336.76	1.54	365.86	26.51	7.95386
PL-60		0.103277		18.6705	0.205039	0.0534258	0.553132	0.269832		0.393825	0.525483	0.0536185	0.203447	0.0650788		337.42	3	336.34	1.35	344.81	24.39	2.45643
PL-61		0.103317		18.6337	0.206331	0.0536523	0.614011	0.201257		0.394128	0.601667	0.0537075	0.212865	0.148646		339.6	3.42	336.99	1.35	357.47	26.99	5.72915
PL-62		0.10324		18.6588	0.216004	0.0533064	0.561507	0.061731		0.394198	0.566984	0.0536569	0.214173	0.342648		337.06	3.31	336.55	1.41	340.57	24.85	1.18037
PL-63		0.10333		18.6488	0.208686	0.0534605	0.681686	0.118129		0.394076	0.688158	0.0536984	0.207817	0.180708		338.29	3.88	336.73	1.35	349.04	30.13	3.52682
PL-64		0.103305		18.6612	0.208342	0.0532942	0.608855	0.16813		0.393963	0.616519	0.0536654	0.210718	0.189177		337.02	3.43	336.51	1.35	340.57	27.07	1.19212
Mean values ± 2sd				18.6542	0.0231688	0.054342	0.00495904			0.394108	0.000929335	0.0536818	4.43567e-05					336.629	0.406945	381.381	187.289
FC1 (207Pb/206Pb correction reference material)
FC1-3		0.9124		5.58843	0.265944	0.0765374	0.679172	0.306731		1.76323	0.652961	0.179332	0.263074	0.0978595		1076.39	8.46	1061.19	5.18	1107.29	26.63	4.16332
FC1-4		0.785581		5.50235	0.207723	0.0758515	0.405727	0.0786185		1.89003	0.436119	0.181994	0.204915	0.386662		1081.46	5.81	1076.47	4.08	1091.53	16.1	1.37971
FC1-5		0.693334		5.55251	0.231909	0.0759566	0.489147	0.189827		1.85616	0.499847	0.180428	0.232649	0.27001		1076.31	6.51	1067.52	4.43	1094.17	19.23	2.43564
FC1-6		0.702877		5.44912	0.214671	0.0760675	0.455148	0.19434		1.80273	0.464454	0.183851	0.21178	0.272048		1089.71	6.12	1086.16	4.11	1096.8	18.04	0.970095
FC1-7		0.70833		5.46142	0.171867	0.0760376	0.353842	0.254941		1.92402	0.34756	0.183279	0.173455	0.232267		1087.32	4.55	1083.91	3.32	1094.17	13.74	0.937697
FC1-8		0.495014		5.72194	0.285572	0.0761396	0.572859	0.286949		1.85901	0.559641	0.175344	0.285578	0.18984		1057.34	7.22	1038.32	5.45	1096.8	22.36	5.33187
FC1-9		0.72008		5.53386	0.199535	0.0765276	0.443082	0.193823		1.69221	0.448738	0.180884	0.196071	0.249905		1082.9	5.83	1070.82	3.87	1107.29	17.23	3.29363
FC1-10		0.722872		5.42677	0.194419	0.0759416	0.338126	0.320266		1.74819	0.337056	0.184498	0.195604	0.241637		1090.69	4.35	1090.26	3.74	1091.53	13.35	0.11635
FC1-11		0.594461		5.40361	0.224994	0.0758705	0.499502	0.272594		1.92873	0.480388	0.185441	0.224736	0.195174		1093.55	6.41	1094.57	4.34	1091.53	19.63	-0.278508
FC1-12		0.785276		5.51428	0.210241	0.0759412	0.456344	0.158847		1.51575	0.476137	0.181488	0.203285	0.322613		1080.02	6.18	1074.33	4.07	1091.53	18.06	1.57577
FC1-13		0.654402		5.69117	0.247547	0.0762246	0.413008	-0.00255725		1.82361	0.445115	0.176152	0.248891	0.479855		1061.74	6.21	1043.49	4.72	1099.43	16.08	5.08809
FC1-14		0.812631		5.34951	0.277403	0.0768188	0.443607	0.159697		2.04925	0.485821	0.187354	0.277502	0.413053		1108.24	6.38	1104.74	5.57	1115.1	17.21	0.929065
FC1-15		0.791804		5.4903	0.214688	0.0759286	0.350683	0.236632		2.17482	0.374912	0.182354	0.212278	0.267583		1082.93	4.74	1078.65	4.09	1091.53	13.74	1.18
FC1-17		0.668179		5.57671	0.223942	0.0764919	0.414592	0.296572		1.88412	0.407695	0.179682	0.223232	0.252474		1077.78	5.25	1063.25	4.23	1107.29	16.06	3.97728
FC1-18		0.775646		5.442	0.188073	0.0765477	0.364719	0.0860643		1.90031	0.39663	0.183965	0.186332	0.372554		1094.08	5.15	1087.46	3.73	1107.29	14.1	1.79086
FC1-19		0.7258		5.52437	0.223034	0.0760943	0.356124	0.288887		1.89859	0.361194	0.181383	0.223135	0.314384		1080.56	4.74	1072.52	4.26	1096.8	14.12	2.21371
FC1-20		0.671101		5.63081	0.317625	0.0763319	0.57622	0.0594788		1.89379	0.602759	0.177991	0.321	0.42485		1069.65	8.37	1053.82	6.1	1102.05	22.73	4.37639
FC1-21		0.872259		5.55709	0.234783	0.0763142	0.367282	0.0354848		1.92781	0.416804	0.180154	0.229389	0.488875		1078.38	5.58	1066.7	4.43	1102.05	14.5	3.20766
FC1-22		0.955018		5.55378	0.215912	0.0760597	0.340035	0.178371		1.62906	0.391946	0.1804	0.216242	0.471627		1077.03	4.82	1067.29	4.24	1096.8	13.34	2.69055
FC1-23		0.615593		5.72533	0.194903	0.0763806	0.35451	0.180441		1.79388	0.378443	0.174834	0.195265	0.365428		1059.53	4.73	1037.75	3.57	1104.67	13.71	6.05792
FC1-24		0.795563		5.75867	0.267647	0.0762637	0.363352	0.201512		2.29165	0.375792	0.174163	0.270395	0.190885		1054.85	5.2	1032.19	5.05	1102.05	14.11	6.3391
FC1-25		0.811374		5.68339	0.173364	0.0758469	0.296554	0.175294		1.8523	0.317439	0.176152	0.173381	0.360519		1059.18	4.1	1044.82	3.21	1088.89	11.78	4.04724
FC1-26		0.586481		5.41545	0.208187	0.0758481	0.378574	0.129974		2.00052	0.397729	0.184856	0.207764	0.393202		1091.21	5.37	1092.37	4.14	1088.89	14.92	-0.319592
FC1-27		0.684954		5.32412	0.19795	0.0762589	0.422879	0.237947		1.9678	0.426475	0.188068	0.199337	0.243153		1107.04	5.55	1109.58	4	1102.05	16.46	-0.683272
FC1-28		0.680426		5.49214	0.181439	0.0761303	0.369555	0.201253		1.92068	0.381783	0.182322	0.181205	0.289072		1084.46	4.93	1078.33	3.5	1096.8	14.51	1.68399
FC1-29		0.588702		5.30618	0.165354	0.076239	0.347763	0.167999		1.98781	0.353305	0.188572	0.169708	0.330162		1108.43	4.79	1113.02	3.41	1099.43	13.72	-1.2361
FC1-32		0.767278		5.38177	0.239298	0.0760772	0.408561	0.120995		1.95987	0.444304	0.186118	0.241176	0.425529		1098.03	5.91	1098.64	4.75	1096.8	16.08	-0.167761
Mean values ± 2sd				5.52063	0.248634	0.0761751	0.000512874			1.88652	0.307268	0.181521	0.00803053					1073.64	44.3636	1098.54	13.343
GJ1
GJ1-2		0.035057		10.3573	0.275693	0.0592417	0.791372	0.196759		0.930479	0.783459	0.0968058	0.271506	0.191765		589.89	6.88	594.16	3.11	573.48	33.67	-3.60605
GJ1-3		0.0427854		10.3562	0.234855	0.0608087	0.715279	0.223924		0.741244	0.693708	0.0967425	0.238003	0.10868		601.96	6.28	594.22	2.56	631.2	30.39	5.85868
GJ1-4		0.0412797		10.1452	0.218295	0.0602508	0.680654	0.258935		0.815995	0.658569	0.0987586	0.216878	0.0590812		607.57	5.9	606.02	2.49	613.39	28.79	1.20152
GJ1-5		0.0351575		10.3376	0.222707	0.0604099	0.678734	0.157175		0.791815	0.666465	0.0967984	0.218108	0.173971		599.78	6.05	595.24	2.45	616.96	28.77	3.52049
GJ1-6		0.0381854		10.2933	0.243857	0.0603866	0.723033	0.232517		0.740772	0.709479	0.0973847	0.242718	0.111309		601.73	6.26	597.69	2.69	616.96	30.47	3.12338
GJ1-7		0.0335146		10.4118	0.249376	0.0605878	0.694427	0.214602		0.806413	0.693418	0.0961061	0.25072	0.145266		598.04	6.04	591.19	2.77	624.1	29.16	5.27319
GJ1-8		0.0292189		10.563	0.314069	0.0604082	0.912996	0.156815		0.803697	0.89311	0.0947323	0.314349	0.213163		590.07	8.02	583.1	3.39	616.96	38.51	5.4882
GJ1-9		0.0426348		10.4919	0.24267	0.0604915	0.667364	0.114249		0.69757	0.674164	0.0952799	0.245742	0.300361		593.84	6.04	586.87	2.64	620.53	28.33	5.4244
GJ1-10		0.0336169		10.347	0.238133	0.0598841	0.631952	0.146349		0.709474	0.637725	0.0967632	0.236731	0.215363		595.61	5.66	594.73	2.67	598.99	26.74	0.711197
GJ1-11		0.031722		10.2481	0.219619	0.0598317	0.585229	0.176208		0.815601	0.586748	0.097667	0.21852	0.211491		599.19	5.25	600.21	2.47	595.37	25.06	-0.81294
GJ1-12		0.0407069		10.3861	0.258096	0.0602955	0.672951	0.16151		0.609057	0.684552	0.0965085	0.260648	0.213898		596.91	6	592.59	2.89	613.39	28.37	3.39099
GJ1-13		0.033859		10.8208	0.310388	0.0596172	0.733455	0.160445		0.736548	0.754488	0.0927169	0.309904	0.259782		573.48	6.41	569.8	3.31	588.11	31.04	3.11336
GJ1-14		0.0412336		10.133	0.208298	0.0601418	0.622519	0.102334		0.842085	0.624987	0.0988615	0.208226	0.232186		606.6	5.67	606.71	2.38	606.2	26.28	-0.0841306
GJ1-15		0.0393356		10.8044	0.217315	0.0597678	0.595361	0.185335		0.97259	0.596491	0.0926994	0.219346	0.160756		575.62	5.16	570.63	2.35	595.37	25.48	4.1554
GJ1-17		0.036308		10.8223	0.223693	0.0603759	0.618512	0.16451		0.768759	0.62859	0.0925513	0.225049	0.189112		579.29	5.39	569.73	2.35	616.96	26.24	7.65528
GJ1-18		0.0364963		10.4479	0.219485	0.059812	0.622211	0.173537		0.765609	0.623199	0.0958486	0.217739	0.184648		590.5	5.45	589.24	2.43	595.37	26.33	1.02961
GJ1-19		0.0351565		10.3634	0.205958	0.0596318	0.606088	0.192719		0.793116	0.602994	0.096586	0.201642	0.139155		592.64	5.33	593.83	2.33	588.11	25.94	-0.972607
GJ1-20		0.0315586		10.2655	0.202939	0.0602899	0.600919	0.204986		0.820455	0.59418	0.097543	0.205458	0.141123		602.2	5.27	599.23	2.24	613.39	25.4	2.30848
GJ1-22		0.050492		10.1429	0.245288	0.0600488	0.578528	0.158227		0.670995	0.583974	0.0988223	0.24272	0.291876		605.4	5.31	606.15	2.83	602.6	24.6	-0.589114
GJ1-23		0.0275241		10.599	0.227481	0.0600482	0.570574	0.162696		0.721826	0.589877	0.0944768	0.230811	0.220159		585.58	5.05	581.2	2.51	602.6	24.18	3.55128
GJ1-24		0.037566		10.5232	0.204738	0.0601607	0.660795	0.0540051		1.22066	0.657208	0.095129	0.203643	0.0307151		590.27	5.96	585.21	2.19	609.8	27.96	4.03247
GJ1-25		0.0400267		10.4989	0.213507	0.0606153	0.55677	0.267107		0.800791	0.554956	0.0954235	0.213992	0.119912		594.28	4.79	586.5	2.31	624.1	23.67	6.02468
GJ1-26		0.0342077		10.3955	0.209869	0.0599926	0.565805	0.198112		0.842995	0.5535	0.0963383	0.212067	0.173171		594.26	5	592.07	2.33	602.6	24.18	1.74743
GJ1-27		0.0369573		10.4051	0.203557	0.06059	0.536394	0.20121		0.798808	0.535401	0.0962109	0.207607	0.170654		598.33	4.76	591.55	2.22	624.1	22.82	5.21551
GJ1-28		0.0381633		10.3102	0.194755	0.0593163	0.551369	0.0844653		0.797779	0.573315	0.097141	0.195143	0.28332		592.69	4.99	596.75	2.12	577.15	23.43	-3.396
GJ1-29		0.0239461		10.1499	0.195022	0.0600611	0.54965	0.142893		0.817748	0.561537	0.0985872	0.193945	0.201366		605.84	4.99	605.75	2.27	606.2	23.31	0.0742329
Mean values ± 2sd				10.4085	0.391232	0.0601179	0.000797572			0.801265	0.226203	0.0962493	0.00356736					591.553	20.9966	606.692	29.4705
91500
91500-2		0.377807		5.96398	0.379835	0.0765206	0.966721	0.109501		2.22518	0.992963	0.168382	0.38509	0.239902		1033.71	12.74	999.28	6.89	1107.29	37.99	9.75445
91500-3		0.477577		5.89567	0.336205	0.0757	0.92477	0.125062		1.606	0.934496	0.17014	0.333915	0.246903		1034.36	11.95	1009.99	6.23	1086.25	36.15	7.02048
91500-4		0.462733		5.73696	0.328733	0.0751557	0.931617	0.257344		1.80501	0.893905	0.174803	0.327112	0.0776689		1047.81	11.57	1035.8	6.19	1072.95	36.61	3.46242
91500-5		0.390553		5.80704	0.351979	0.0759178	0.895425	0.163587		1.78392	0.903864	0.172921	0.354609	0.261035		1045.94	11.65	1024.25	6.5	1091.53	35.33	6.16383
91500-6		0.437199		5.86699	0.384648	0.0758693	0.938225	0.213202		1.61519	0.93296	0.171161	0.384762	0.202205		1039.24	11.93	1014.56	6.99	1091.53	36.9	7.05157
91500-7		0.375329		6.01823	0.367364	0.0754504	0.915171	0.288972		1.73832	0.887675	0.166796	0.360375	0.112787		1019.37	11.18	990.93	6.66	1080.94	36.17	8.32701
91500-8		0.333871		5.90139	0.349786	0.0746782	0.910699	0.298508		1.81276	0.867059	0.169989	0.343762	0.0557708		1025.13	11.03	1009.09	6.41	1059.54	35.9	4.7615
91500-9		0.522658		5.75708	0.324574	0.0735411	0.906921	0.17863		1.56823	0.903996	0.174426	0.31892	0.157292		1030.66	11.54	1032.46	5.98	1026.86	36.07	-0.545352
91500-10		0.383013		5.65053	0.342297	0.0751873	0.898958	0.22315		1.61941	0.892847	0.17765	0.343369	0.170845		1057.77	11.44	1050.43	6.46	1072.95	35.43	2.09889
91500-11		0.345119		5.72504	0.362409	0.0757437	0.860393	0.235212		1.90193	0.823037	0.175444	0.368206	0.191131		1053.52	10.93	1037.8	6.76	1086.25	33.79	4.4603
91500-12		0.503269		5.63868	0.312675	0.0757029	0.839703	0.0710785		1.36525	0.823892	0.177796	0.308391	0.100567		1063.51	11.3	1052.46	5.9	1086.25	33	3.1107
91500-13		0.35225		5.97146	0.344503	0.0757391	0.839115	0.143166		1.65498	0.840772	0.168166	0.33869	0.243408		1026.09	10.88	998.11	6.16	1086.25	33	8.11415
91500-15		0.445165		5.86356	0.32879	0.0740637	0.801645	0.163695		2.41111	0.820247	0.171116	0.329683	0.244059		1024.07	10.29	1015.11	6.07	1043.28	31.63	2.70014
91500-16		0.37786		5.48977	0.323142	0.0743397	0.827655	0.125664		1.77243	0.838843	0.182732	0.331612	0.2782		1068.85	11.03	1078.74	6.23	1048.72	32.79	-2.86254
91500-17		0.389441		5.89972	0.335862	0.0745117	0.815837	0.243922		1.7474	0.801493	0.170178	0.335557	0.15575		1023.59	10.21	1009.36	6.23	1054.14	32.37	4.24801
91500-18		0.422517		5.62857	0.302882	0.0752543	0.777193	0.186684		1.77894	0.779971	0.178238	0.304363	0.21772		1061.2	10.09	1054.2	5.72	1075.62	30.69	1.99141
91500-19		0.40713		5.81717	0.352163	0.0757761	0.970646	0.206631		1.79344	0.944164	0.172672	0.354777	0.181381		1043.94	12.28	1022.59	6.49	1088.89	38.1	6.08877
91500-20		0.34901		5.79953	0.342412	0.0751965	0.827595	0.149668		1.80923	0.84114	0.173067	0.341339	0.243966		1040.75	10.83	1025.48	6.32	1072.95	32.68	4.42425
91500-21		0.461165		5.6912	0.30274	0.0752435	0.743245	0.102435		1.95343	0.772618	0.176088	0.29182	0.293897		1053.06	9.89	1043.49	5.66	1072.95	29.13	2.7457
91500-22		0.623988		5.56176	0.333436	0.0742069	0.783327	0.339862		1.47778	0.77013	0.180602	0.334665	0.0513986		1059.37	9.49	1065.87	6.35	1046.01	30.83	-1.89864
91500-23		0.302454		5.93041	0.310152	0.0734275	0.746152	0.199952		1.47178	0.779189	0.169209	0.31161	0.235438		1010.69	9.44	1004.52	5.65	1024.11	29.74	1.91288
91500-24		0.422264		5.67782	0.308462	0.0753659	0.717917	0.210688		3.32856	0.723975	0.176805	0.310452	0.166763		1056.35	9.28	1045.77	5.87	1078.28	28.32	3.01499
91500-25		0.463794		5.80695	0.296492	0.0737149	0.755775	0.222184		1.7542	0.754422	0.172601	0.300321	0.192784		1026.84	9.53	1024.25	5.57	1032.36	30.1	0.785579
91500-26		0.382674		5.87064	0.303858	0.0747735	0.80519	0.229909		1.88323	0.789171	0.170831	0.305659	0.148191		1029.38	10.1	1013.99	5.52	1062.23	31.94	4.54139
91500-27		0.404776		5.73902	0.312934	0.0756081	0.732714	0.182255		1.80858	0.723986	0.174741	0.303128	0.171112		1051.06	9.49	1035.47	5.81	1083.6	28.69	4.44168
91500-28		0.456353		5.76897	0.29202	0.0750157	0.753867	0.176696		1.79967	0.758481	0.173945	0.292999	0.241634		1042.45	9.64	1030.49	5.41	1067.6	29.55	3.47602
91500-29		0.246265		5.63331	0.356458	0.0745795	0.760455	0.223776		1.83201	0.773354	0.178119	0.362928	0.239119		1054.51	9.83	1053.39	6.86	1056.84	29.99	0.326445
91500-32		0.399833		5.56398	0.318803	0.0760175	0.786408	0.271102		1.90801	0.767584	0.180382	0.315806	0.139776		1074.94	9.98	1065.48	6.16	1094.17	31	2.62208
Mean values ± 2sd				5.77412	0.272869	0.0750822	0.00159328			1.8295	0.721126	0.173893	0.00822645					1030.12	45.2066	1069.65	42.9943
2022 February zircon laser ablatiob split-stream analysis
Plešovice (primary reference material)
PL-1		0.103663		18.6516	0.223521	0.0531005	0.71632	0.199643		0.394717	0.705475	0.0537216	0.224519	0.114317		336.09	3.98	336.68	1.41	332.05	32	-1.39437
PL-2		0.102662		18.6762	0.240063	0.0526458	0.770873	0.184483		0.392452	0.769856	0.0536654	0.240029	0.135138		333.02	4.25	336.24	1.54	310.56	34.35	-8.26893
PL-3		0.103511		18.7243	0.26646	0.0529553	0.831674	0.158671		0.394917	0.808548	0.0535278	0.265591	0.146635		334.44	4.64	335.4	1.73	327.78	36.92	-2.32473
PL-4		0.103459		18.6324	0.223475	0.0523089	0.716667	0.0994617		0.393884	0.740636	0.0537565	0.223647	0.207815		332.06	4.06	337.01	1.42	297.52	32.2	-13.2731
PL-5		0.104232		18.6315	0.248828	0.0532627	0.759994	0.126455		0.393779	0.771206	0.0537103	0.254075	0.209963		337.48	4.33	337.03	1.61	340.57	33.73	1.03943
PL-6		0.103245		18.6679	0.24748	0.0537804	0.71663	0.115367		0.393763	0.737449	0.0536367	0.248146	0.222695		339.6	4.15	336.39	1.61	361.67	31.83	6.9898
PL-7		0.102238		18.6407	0.216897	0.0539113	0.719243	0.141468		0.396682	0.718865	0.053711	0.216925	0.157504		340.56	4.1	336.87	1.42	365.86	31.81	7.9238
PL-8		0.103472		18.6593	0.22115	0.0526231	0.731559	0.215368		0.391848	0.721919	0.0536611	0.221245	0.0763625		333.28	3.98	336.54	1.41	310.56	32.57	-8.36553
PL-9		0.103793		18.6881	0.269374	0.0527263	0.722864	0.28979		0.392488	0.734841	0.0536233	0.273207	0.118428		333.38	3.85	336.04	1.73	314.88	32.1	-6.72002
PL-10		0.102672		18.6374	0.228772	0.0536796	0.823202	0.160593		0.396101	0.811866	0.0537255	0.231004	0.110635		339.54	4.61	336.93	1.48	357.47	36.28	5.74594
PL-11		0.1028		18.6893	0.242737	0.0531799	0.761626	0.231251		0.391899	0.74913	0.053607	0.24545	0.117508		336.05	4.16	336.01	1.54	336.32	33.75	0.0921741
PL-12		0.104059		18.6484	0.242976	0.0534964	0.718439	0.115786		0.396105	0.737693	0.0537499	0.243222	0.215495		338.29	4.13	336.73	1.54	349.04	31.9	3.52682
PL-13		0.103815		18.6545	0.23494	0.0524025	0.699377	0.173467		0.392311	0.685143	0.0536851	0.238962	0.169896		332.27	3.88	336.62	1.48	301.88	31.28	-11.5079
PL-14		0.102549		18.6452	0.236817	0.0535554	0.685834	0.183313		0.395641	0.675821	0.0536723	0.231731	0.147728		338.88	3.88	336.79	1.54	353.26	30.55	4.66229
PL-15		0.103686		18.6599	0.237921	0.0534529	0.734196	0.219569		0.393661	0.735381	0.0536545	0.240194	0.10347		338.12	4.04	336.53	1.54	349.04	32.35	3.58412
PL-16		0.103242		18.6502	0.270004	0.0534717	0.731149	0.219834		0.394219	0.723393	0.0537177	0.265849	0.157413		338.27	4.06	336.7	1.74	349.04	32.35	3.53541
PL-17		0.102591		18.6827	0.248216	0.0542496	0.678914	0.148813		0.394604	0.677001	0.053633	0.2462	0.215461		341.52	3.91	336.13	1.6	378.36	29.98	11.1613
PL-18		0.103828		18.652	0.25475	0.0533366	0.718076	0.201329		0.393302	0.713617	0.0537268	0.249908	0.158967		337.16	4.01	336.67	1.61	340.57	31.95	1.14514
PL-19		0.102951		18.6657	0.237685	0.0532667	0.745057	0.181641		0.39447	0.743585	0.0536735	0.23963	0.132343		336.95	4.19	336.43	1.54	340.57	33.28	1.21561
PL-20		0.103714		18.6444	0.220792	0.0529509	0.677693	0.237954		0.393676	0.668899	0.0536842	0.222907	0.0754129		335.66	3.71	336.8	1.41	327.78	30.25	-2.75185
Mean values ± 2sd				18.6601	0.045824	0.0532178	0.00102329			0.394026	0.00283268	0.0536771	0.00010957					336.527	0.804804	337.239	43.9666
FC1 (207Pb/206Pb correction reference material)
FC1-1		0.739181		5.48386	0.201278	0.0762523	0.366252	0.257909		1.99738	0.37583	0.182586	0.203252	0.309118		1087.21	4.87	1079.81	3.9	1102.05	14.5	2.01806
FC1-2		0.728405		5.43409	0.252045	0.0760253	0.447747	0.299925		2.02088	0.450348	0.184174	0.257977	0.273272		1090.67	5.82	1088.92	4.91	1094.17	17.66	0.479816
FC1-3		0.672155		5.43829	0.274037	0.0762904	0.474258	0.136349		1.90762	0.509609	0.184092	0.264043	0.401879		1092.79	6.68	1088.14	5.3	1102.05	18.42	1.26219
FC1-4		0.567014		5.39625	0.258159	0.0760575	0.515017	0.155965		1.99638	0.525242	0.185623	0.257571	0.347227		1096.23	7.15	1095.95	5.14	1096.8	20.4	0.0774982
FC1-5		0.601228		5.35128	0.214539	0.0756902	0.439231	0.249873		1.92303	0.444984	0.187208	0.216697	0.245627		1098.3	5.76	1104.4	4.18	1086.25	17.29	-1.67089
FC1-6		0.648589		5.49699	0.242267	0.0765902	0.399697	0.237655		1.93345	0.421327	0.182254	0.238133	0.314737		1088.23	5.43	1077.44	4.67	1109.9	15.66	2.92459
FC1-7		0.716427		5.28991	0.245063	0.076064	0.41327	0.257663		1.9324	0.416946	0.189338	0.244244	0.32713		1109.62	5.58	1116.17	5.02	1096.8	16.08	-1.76605
FC1-8		0.729892		5.34676	0.214576	0.0761324	0.385091	0.289578		1.95969	0.371208	0.187306	0.215547	0.268868		1102.41	5.08	1105.25	4.18	1096.8	15.3	-0.770423
FC1-9		0.721284		5.3847	0.225688	0.0761017	0.362065	0.249338		1.96556	0.370108	0.186077	0.225075	0.342235		1097.67	4.94	1098.1	4.55	1096.8	14.12	-0.118527
FC1-10		0.539928		5.32844	0.241141	0.076182	0.387857	0.200663		1.99668	0.416378	0.187869	0.235009	0.393354		1105.61	5.48	1108.76	4.79	1099.43	15.29	-0.848622
Mean values ± 2sd				5.39506	0.135844	0.0761386	0.000456669			1.96331	0.0768036	0.185653	0.00468573					1096.29	25.3668	1098.11	12.1991
GJ1
GJ1-1		0.0206657		10.3297	0.255006	0.0596389	0.766758	0.146063		0.838219	0.781273	0.0969807	0.257787	0.161799		594.11	6.84	595.68	2.9	588.11	32.74	-1.28717
GJ1-2		0.0292485		10.3378	0.255561	0.0598552	0.744433	0.184802		0.843534	0.75341	0.0969406	0.258659	0.161673		596.01	6.52	595.23	2.9	598.99	31.41	0.627723
GJ1-3		0.0339014		10.3863	0.385026	0.0605994	1.00158	0.189064		0.791252	1.02178	0.0965334	0.384302	0.174651		599.15	8.89	592.58	4.33	624.1	42.26	5.05047
GJ1-4		0.0253914		10.4166	0.475623	0.0591034	1.14348	0.152537		0.814346	1.21116	0.0962752	0.474606	0.230585		586.58	10.2	590.93	5.31	569.8	48.62	-3.70832
GJ1-5		0.035334		10.4008	0.393581	0.0594137	1.043	0.145033		0.775142	1.08075	0.0963627	0.399338	0.232512		589.52	9.26	591.79	4.32	580.81	44.27	-1.89046
GJ1-6		0.0352639		10.4506	0.417802	0.059819	1.09815	0.327443		0.798191	1.05422	0.0959785	0.414271	0.0444747		590.39	9.14	589.09	4.63	595.37	46.71	1.05481
GJ1-7		0.0215983		10.3736	0.509047	0.0593674	1.49664	0.0383034		0.765152	1.51901	0.0965623	0.49384	0.306449		590.69	13.74	593.27	5.67	580.81	63.86	-2.14528
GJ1-8		0.0229509		10.3755	0.392992	0.0580457	0.983374	0.154553		0.769617	1.00535	0.096595	0.392382	0.248942		580	8.64	593.16	4.33	528.78	42.09	-12.1752
GJ1-9		0.0309888		10.3893	0.30319	0.0597534	0.825837	0.221616		0.801453	0.81277	0.0964237	0.303158	0.181169		593.02	7.2	592.41	3.33	595.37	35.25	0.49717
GJ1-10		0.0160395		10.3245	0.420302	0.0601386	1.1846	0.203543		0.818518	1.15669	0.0970691	0.42512	0.162486		598.1	10.36	595.96	4.69	606.2	50.02	1.68921
Mean values ± 2sd				10.3785	0.0797391	0.0595735	0.00136159			0.801542	0.0546432	0.0965721	0.000685804					593.01	4.35002	586.834	50.7364
91500
91500-1		0.41335		5.47556	0.507686	0.0725699	1.08985	0.154946		1.87936	1.12982	0.183936	0.501339	0.281895		1055.31	14.53	1081.32	9.95	1001.9	43.37	-7.92694
91500-2		0.411742		5.57836	0.408484	0.0730926	1.14817	0.215516		1.86245	1.13983	0.179959	0.41482	0.12343		1047.63	14.53	1062.95	7.87	1015.82	45.66	-4.6396
91500-3		0.413514		5.68882	0.406948	0.0737852	1.13143	0.127082		1.76017	1.13488	0.176152	0.40417	0.216643		1041.06	14.7	1043.9	7.74	1035.1	44.74	-0.850159
91500-4		0.404229		5.64665	0.43043	0.0740422	1.01903	0.11246		1.84222	1.05504	0.177937	0.432674	0.295707		1047.67	13.6	1051.08	8.17	1040.56	40.35	-1.01099
91500-5		0.41819		5.55299	0.351167	0.0746858	0.867373	0.069637		1.8447	0.91535	0.180828	0.342834	0.314846		1064.84	11.83	1067.43	6.75	1059.54	34.32	-0.744663
91500-6		0.412903		5.5596	0.358146	0.074622	1.00215	0.194607		1.85773	0.987411	0.180653	0.354122	0.146501		1063.17	12.85	1066.26	6.93	1056.84	39.46	-0.891336
91500-7		0.406753		5.51119	0.360634	0.0740377	1.00009	0.219003		1.82698	0.992353	0.182024	0.353403	0.150306		1063.61	12.74	1074.88	6.99	1040.56	39.56	-3.29822
91500-8		0.412691		5.53652	0.338279	0.0739753	0.888394	0.13529		1.84038	0.911411	0.181349	0.344261	0.244103		1060.6	11.72	1070.36	6.57	1040.56	35.21	-2.86384
91500-9		0.408837		5.55268	0.378372	0.0756771	0.884623	0.134534		1.88899	0.911743	0.180894	0.376761	0.302091		1073.67	11.82	1067.48	7.33	1086.25	34.57	1.72796
91500-10		0.406509		5.53331	0.354666	0.0737816	0.962807	0.27014		1.85777	0.930374	0.181499	0.350875	0.109548		1059.19	11.97	1070.93	6.77	1035.1	38.01	-3.4615
Mean values ± 2sd				5.56357	0.125061	0.0740269	0.00171643			1.84607	0.0708193	0.180523	0.00431505					1065.66	21.9123	1041.22	46.5463
*Ratios and associated uncertainties were reduced using the VizualAge UcomPbine data reduction scheme (Chew et al., 2014) of the Iolite 4.7.1 program.
†Dates and associated uncertainties were reduced by the IsoplotR program (Vermeesch, 2018) with a 238U/235U value of 137.818 (Hiess et al., 2012) and decay constants of λ238 = 1.551×10–10 yr–1 and λ235 = 9.849×10–10 yr–1 (Jaffey et al., 1971).
§Discordance (%) was calculated as [1-(206Pb/238U date/207Pb/206Pb date)]*100.

## Sheet: Table S3
TABLE S3. SUMMARY OF LU-HF ISOTOPE FOR ZIRCON REFERENCE MATERIALS
Standard		176Hf/177Hf	2se	176Lu/177Hf	2se	176Yb/177Hf	2se	178Hf/177Hf	2se	180Hf/177Hf	2se
2021 September zircon laser ablatiob split-stream analysis
Plešovice (primary reference material)
PL-19		0.282498	2.23985e-05	6.95278e-05	1.10951e-06	0.00348614	3.06265e-05	1.46707	3.98757e-05	1.88736	0.000106406
PL-20		0.282489	1.94684e-05	7.21718e-05	1.27125e-06	0.00359205	3.54061e-05	1.46708	5.38686e-05	1.88734	0.000104823
PL-21		0.282482	2.06227e-05	5.89486e-05	8.18397e-07	0.0029853	2.73769e-05	1.46711	4.56198e-05	1.88749	7.70867e-05
PL-22		0.282481	1.66879e-05	8.24159e-05	7.23228e-07	0.00423438	0.000114562	1.46706	4.33044e-05	1.88748	9.21846e-05
PL-23		0.282486	2.27515e-05	9.0703e-05	1.73419e-06	0.00450519	0.000104492	1.46704	5.50308e-05	1.88758	0.000101091
PL-24		0.28247	1.95999e-05	8.48414e-05	2.5828e-06	0.00445595	6.23642e-05	1.46705	3.30886e-05	1.88755	9.67233e-05
PL-25		0.282477	1.80277e-05	5.89872e-05	6.93357e-07	0.00304931	5.09691e-05	1.46706	4.84328e-05	1.88762	9.0324e-05
PL-26		0.282464	2.36055e-05	5.94324e-05	8.25679e-07	0.00306741	3.71068e-05	1.46706	4.46909e-05	1.88763	9.34823e-05
PL-27		0.282485	2.39522e-05	7.09323e-05	1.84669e-06	0.0038474	4.92564e-05	1.46703	3.95088e-05	1.88764	0.000105723
PL-28		0.282481	2.15697e-05	8.16727e-05	2.54769e-06	0.00417205	7.74633e-05	1.46706	3.84101e-05	1.88772	8.55572e-05
PL-29		0.282474	2.08014e-05	7.43502e-05	2.15875e-06	0.00371238	7.031e-05	1.46702	4.05705e-05	1.88772	9.92715e-05
PL-30		0.282484	1.41244e-05	6.96939e-05	5.68494e-07	0.00343845	2.62115e-05	1.46705	4.67863e-05	1.88772	9.60928e-05
PL-31		0.282483	1.97511e-05	7.79597e-05	9.15008e-07	0.00410183	7.53167e-05	1.46701	5.14102e-05	1.88772	0.000113676
PL-32		0.28248	2.21344e-05	0.000106104	1.53614e-06	0.00536266	3.3697e-05	1.46702	4.43228e-05	1.88779	9.02739e-05
PL-33		0.282488	2.2272e-05	0.000111489	2.32904e-06	0.00566731	3.3664e-05	1.46706	4.17023e-05	1.88779	8.94119e-05
PL-34		0.282489	2.24167e-05	8.19364e-05	6.61992e-07	0.00435639	0.000160969	1.46706	4.45653e-05	1.88784	0.000109432
PL-35		0.282478	2.57551e-05	8.30694e-05	1.53609e-06	0.00431763	3.01016e-05	1.46702	4.74477e-05	1.88787	0.000119664
PL-36		0.282489	1.95508e-05	8.07603e-05	1.45167e-06	0.00427787	1.98295e-05	1.46702	5.1785e-05	1.88781	0.000129565
PL-37		0.282482	1.62323e-05	7.96269e-05	4.18224e-07	0.00405924	7.47198e-05	1.46705	5.1277e-05	1.88797	0.000111858
PL-38		0.282475	2.01926e-05	8.36213e-05	5.33165e-07	0.00432537	0.000127935	1.46701	3.63568e-05	1.8879	9.01442e-05
PL-39		0.282469	2.07321e-05	9.26265e-05	1.80461e-06	0.00475261	4.21871e-05	1.46699	5.05019e-05	1.88801	0.000112443
PL-40		0.282489	1.73628e-05	0.000114932	1.91049e-06	0.00580138	1.76775e-05	1.46701	4.58376e-05	1.88805	8.01381e-05
PL-41		0.282482	2.27353e-05	8.49935e-05	1.31568e-06	0.00436621	4.12645e-05	1.467	3.94461e-05	1.88806	0.000109538
PL-42		0.282469	2.21174e-05	6.09352e-05	1.88484e-06	0.00312452	5.62631e-05	1.46702	4.65577e-05	1.88806	0.000105496
PL-43		0.282491	1.99321e-05	0.000120911	3.53947e-06	0.00612722	5.83536e-05	1.467	4.26914e-05	1.88816	0.000128784
PL-44		0.282487	2.05096e-05	7.46081e-05	1.65402e-06	0.00378947	3.15898e-05	1.46702	3.73354e-05	1.88817	9.52664e-05
PL-45		0.282482	2.32509e-05	8.34505e-05	2.26967e-06	0.0042789	4.12792e-05	1.467	3.64069e-05	1.88825	0.000109763
PL-46		0.282486	2.39821e-05	0.000117014	1.86421e-06	0.00584556	1.87606e-05	1.46697	5.01533e-05	1.88818	0.000120168
PL-47		0.282472	2.13242e-05	9.75337e-05	3.36268e-06	0.00509268	8.64316e-05	1.46694	3.84275e-05	1.88822	0.00010205
PL-48		0.282481	1.78441e-05	8.88384e-05	2.51972e-06	0.00457125	5.66045e-05	1.46701	4.38888e-05	1.88823	0.000108021
PL-49		0.282479	1.85026e-05	7.57289e-05	3.13605e-06	0.00382045	0.000104306	1.467	3.85592e-05	1.88829	0.000107887
PL-50		0.282478	1.82228e-05	5.1402e-05	1.38732e-06	0.00260313	8.40145e-05	1.46696	3.87582e-05	1.88829	8.79962e-05
PL-51		0.282496	1.74879e-05	6.67436e-05	3.16379e-06	0.00331976	0.000106808	1.46695	3.6158e-05	1.88837	9.02793e-05
PL-52		0.282489	1.62914e-05	7.09998e-05	1.72648e-06	0.00358018	0.000125553	1.46699	4.99786e-05	1.88846	0.000123322
PL-53		0.282495	2.01848e-05	8.31373e-05	3.15562e-06	0.00421699	8.96913e-05	1.46692	4.99974e-05	1.88837	0.000110952
PL-54		0.28248	1.65205e-05	0.000101896	1.47051e-06	0.00518189	6.94916e-05	1.46696	4.54357e-05	1.88835	0.000106514
PL-55		0.282471	1.64356e-05	8.27117e-05	6.07335e-07	0.004193	6.24733e-05	1.46695	3.51182e-05	1.8885	0.0001052
PL-56		0.282462	1.84282e-05	8.16649e-05	1.70281e-07	0.00419128	5.53865e-05	1.46693	4.40019e-05	1.88849	0.000107328
PL-57		0.282496	1.83623e-05	9.55138e-05	2.15099e-06	0.00491347	5.99496e-05	1.46692	4.62466e-05	1.88847	9.42369e-05
PL-58		0.282482	2.18438e-05	0.000113954	3.50644e-06	0.00570178	8.80676e-05	1.46693	3.50823e-05	1.88855	9.67606e-05
PL-59		0.282484	1.78335e-05	9.22819e-05	1.76111e-06	0.00477506	5.23345e-05	1.46694	3.34855e-05	1.88856	9.22004e-05
PL-60		0.282488	1.79015e-05	0.000116376	2.61569e-06	0.0059172	5.69337e-05	1.46694	4.14075e-05	1.88853	9.98389e-05
PL-61		0.282473	2.14884e-05	7.91079e-05	3.03469e-06	0.00394493	0.000111886	1.46688	4.64657e-05	1.88859	0.000122887
PL-62		0.282487	2.0974e-05	7.44169e-05	2.85696e-06	0.00374785	9.37892e-05	1.46692	3.91603e-05	1.88861	9.09391e-05
PL-63		0.282484	1.87138e-05	6.71269e-05	2.11145e-06	0.00322954	0.000113096	1.46691	4.24927e-05	1.88871	9.70097e-05
PL-64		0.282477	1.48973e-05	7.96593e-05	1.18422e-06	0.0039502	8.91939e-05	1.46691	4.31623e-05	1.88871	0.000105305
Mean values ± 2sd		0.282482	1.63929e-05	8.36262e-05	3.37847e-05
FC1
FC1-10		0.282235	2.823e-05	0.00138564	1.94806e-06	0.0539126	0.00113741	1.46714	5.6759e-05	1.88741	0.000126399
FC1-11		0.282193	2.31525e-05	0.000923651	4.42826e-05	0.0351367	0.00277036	1.4671	4.55462e-05	1.88755	0.000108995
FC1-12		0.28223	2.68097e-05	0.00103722	3.01447e-05	0.0384698	0.0010537	1.46707	5.19995e-05	1.88752	0.000105693
FC1-13		0.282221	2.22642e-05	0.00129755	2.79046e-05	0.0427001	0.000608247	1.46701	6.30369e-05	1.88759	9.36664e-05
FC1-14		0.282231	2.50214e-05	0.00125461	1.35599e-05	0.0466238	0.000767546	1.46705	3.8025e-05	1.88775	0.00010854
FC1-15		0.282236	2.62662e-05	0.00136924	3.58493e-06	0.0546342	0.00110345	1.46706	5.40281e-05	1.88769	0.000112339
FC1-16		0.282212	2.29737e-05	0.00103005	6.1911e-05	0.0375906	0.00262762	1.46705	3.64111e-05	1.88778	0.000126511
FC1-17		0.282227	1.73488e-05	0.0010392	7.02669e-05	0.038731	0.0029163	1.46702	4.34384e-05	1.88775	9.27546e-05
FC1-18		0.282235	2.5145e-05	0.00136518	1.05007e-05	0.050904	0.000523248	1.467	3.911e-05	1.88786	0.000114762
FC1-19		0.28225	2.67785e-05	0.00136008	2.8039e-06	0.0536984	0.00087532	1.46699	4.77874e-05	1.88793	0.000105283
FC1-20		0.282277	3.62861e-05	0.00146761	4.72623e-05	0.0495297	0.0015824	1.46702	6.36169e-05	1.88798	0.000165047
FC1-21		0.282259	2.1008e-05	0.00140806	1.04722e-05	0.0516829	0.000342017	1.467	4.71205e-05	1.88801	0.000112184
FC1-22		0.282267	2.03012e-05	0.00147628	1.6708e-05	0.0535969	0.00079234	1.46701	4.64816e-05	1.88815	8.85272e-05
FC1-23		0.28227	2.89514e-05	0.00139658	3.52236e-06	0.0533896	0.000919164	1.46696	4.49558e-05	1.8881	0.00010377
FC1-24		0.282258	2.60615e-05	0.00137992	9.44228e-07	0.0524308	0.000137518	1.46699	3.41663e-05	1.88827	9.70521e-05
FC1-25		0.282291	2.41615e-05	0.0013957	1.79123e-06	0.0543543	0.00102395	1.46697	3.24424e-05	1.88834	9.01983e-05
FC1-26		0.28221	2.60495e-05	0.000684168	1.19596e-06	0.0259419	0.000803628	1.46692	6.16383e-05	1.88836	9.84071e-05
FC1-27		0.282216	2.85213e-05	0.000711199	1.20203e-05	0.026895	0.000231598	1.46696	5.70533e-05	1.88838	0.00012879
FC1-28		0.282219	2.37252e-05	0.000816205	1.84993e-05	0.0310818	0.000255355	1.46696	4.21954e-05	1.88849	0.000107021
FC1-29		0.282248	2.84684e-05	0.0011374	6.28724e-06	0.0446709	0.00081081	1.46691	3.91237e-05	1.88847	0.000123663
FC1-30		0.282271	2.10189e-05	0.00107288	6.09139e-06	0.0426626	0.000512183	1.46692	3.59307e-05	1.88864	9.65334e-05
FC1-31		0.282316	3.42701e-05	0.00129665	4.23945e-05	0.0459885	0.000823909	1.46683	5.75791e-05	1.8886	0.000156445
FC1-32		0.282251	3.04754e-05	0.00113815	7.30171e-06	0.0423735	0.000320161	1.46691	4.08657e-05	1.88868	0.000106595
Mean values ± 2sd		0.282244	5.80921e-05	0.00119318	0.000480747
GJ1
GJ1-10		0.282025	2.71009e-05	0.000246576	5.16187e-07	0.00824437	0.000133818	1.46709	5.05124e-05	1.88745	0.000122345
GJ1-11		0.282031	2.86048e-05	0.000247173	7.32505e-07	0.00834972	0.000168662	1.46714	5.73148e-05	1.88761	0.000116014
GJ1-12		0.282028	3.1878e-05	0.000250416	3.04833e-06	0.00837937	0.000187058	1.46703	5.83042e-05	1.88758	0.000125505
GJ1-13		0.282034	3.28777e-05	0.000248936	4.31398e-07	0.00810514	8.32539e-05	1.46706	5.21415e-05	1.88763	0.00013427
GJ1-14		0.282017	2.76298e-05	0.000246274	4.26424e-07	0.00846219	0.000149298	1.46706	4.41502e-05	1.88768	0.000117856
GJ1-15		0.282021	2.86003e-05	0.000248237	5.65517e-07	0.00840544	0.000153115	1.46707	3.95759e-05	1.88769	0.000118319
GJ1-16		0.282018	4.14158e-05	0.000285879	8.90138e-06	0.00859677	0.000242417	1.46692	6.85617e-05	1.8875	0.000173898
GJ1-17		0.28201	3.07781e-05	0.000251333	4.67164e-07	0.00807642	3.54837e-05	1.46705	5.59101e-05	1.88775	0.000111442
GJ1-18		0.28201	2.63702e-05	0.000247649	3.69041e-07	0.00844855	0.000142075	1.46696	3.23573e-05	1.88779	0.000105128
GJ1-19		0.282016	2.939e-05	0.000247309	5.80188e-07	0.0083406	0.000130219	1.46699	5.08392e-05	1.88796	9.93638e-05
GJ1-20		0.282012	3.14447e-05	0.00024768	5.76243e-07	0.00832288	0.000139472	1.46698	5.22229e-05	1.88808	0.000114822
GJ1-21		0.282024	2.95323e-05	0.000247696	5.16024e-07	0.00817991	9.51314e-05	1.46702	5.27282e-05	1.88815	0.000115315
GJ1-22		0.282008	2.50429e-05	0.000249299	1.29615e-06	0.00841484	0.000126072	1.46699	4.98754e-05	1.88812	0.000120355
GJ1-23		0.282015	2.29076e-05	0.000247118	5.08743e-07	0.00842823	0.0001518	1.46698	4.69798e-05	1.88819	0.000120694
GJ1-24		0.282025	2.84664e-05	0.000248075	4.09183e-07	0.00825638	0.000103696	1.46693	6.00962e-05	1.88816	0.000111587
GJ1-25		0.282024	2.76145e-05	0.000247455	4.29335e-07	0.00840733	0.000119044	1.46695	3.99745e-05	1.88828	0.000134182
GJ1-26		0.282025	2.56559e-05	0.000247706	4.03933e-07	0.00833981	0.000110848	1.46693	4.87034e-05	1.88835	0.000115205
GJ1-27		0.282024	2.34402e-05	0.0002476	4.8385e-07	0.00836242	9.38919e-05	1.46691	5.36772e-05	1.88835	0.000131575
GJ1-28		0.282018	3.18778e-05	0.000247555	4.72442e-07	0.00837376	0.000121807	1.46694	4.95518e-05	1.88857	0.000128563
GJ1-29		0.282005	2.11953e-05	0.000248102	3.61815e-07	0.00830308	9.22646e-05	1.46693	4.17077e-05	1.8885	0.000112606
GJ1-30		0.282038	3.9455e-05	0.000280448	7.75898e-06	0.00857835	0.000130943	1.46687	5.87285e-05	1.88838	0.000160337
GJ1-31		0.282029	2.99763e-05	0.00024767	4.20895e-07	0.00834287	0.000170821	1.46694	3.57955e-05	1.88868	0.000128654
GJ1-32		0.282014	2.34243e-05	0.000248043	3.51296e-07	0.00823318	0.000105129	1.46685	5.54025e-05	1.88865	0.00010472
Mean values ± 2sd		0.28202	1.72091e-05	0.000251053	2.04536e-05
91500
91500-10		0.28231	2.68008e-05	0.00029292	8.56712e-07	0.0102796	0.000249195	1.46706	6.24088e-05	1.88752	0.000123904
91500-11		0.282314	3.16276e-05	0.000291599	7.49459e-07	0.0103436	0.00023991	1.46705	6.07474e-05	1.88744	0.000133467
91500-12		0.282333	3.17634e-05	0.000294524	8.20047e-07	0.0104034	0.000259219	1.46708	4.94192e-05	1.88763	0.000141219
91500-13		0.2823	2.6796e-05	0.000293972	9.16237e-07	0.01044	0.000251186	1.46704	5.41412e-05	1.88778	0.000109804
91500-14		0.282309	3.07972e-05	0.000294379	7.60077e-07	0.0110785	0.000242687	1.46707	6.18429e-05	1.88762	0.000130639
91500-15		0.282287	2.9275e-05	0.000296172	7.24389e-07	0.0107096	0.000254827	1.46706	4.13015e-05	1.88783	0.000101329
91500-16		0.282304	3.19193e-05	0.000296641	6.05581e-07	0.0106848	0.000233896	1.46706	4.9518e-05	1.8878	0.000137364
91500-17		0.282305	2.75384e-05	0.000297142	7.91707e-07	0.0107802	0.000244883	1.46702	5.32615e-05	1.88775	0.000112079
91500-18		0.282306	2.77706e-05	0.000297155	7.03414e-07	0.0105504	0.000290049	1.46703	5.34179e-05	1.8878	0.000137084
91500-19		0.2823	2.98252e-05	0.000330724	5.13336e-06	0.0101051	9.91969e-05	1.46702	6.43295e-05	1.8879	0.000159481
91500-20		0.282337	3.13032e-05	0.000335952	6.85708e-06	0.0103255	0.00014202	1.46698	6.06369e-05	1.88797	0.000137636
91500-21		0.282305	3.21959e-05	0.000296866	6.38098e-07	0.010391	0.000212398	1.46704	5.70602e-05	1.8881	0.000116641
91500-22		0.282326	3.67285e-05	0.000296836	6.15762e-07	0.0104892	0.000234209	1.46697	5.06061e-05	1.88823	0.000127256
91500-23		0.282313	2.84174e-05	0.000297347	6.33999e-07	0.0105097	0.000211252	1.46705	5.05488e-05	1.8883	0.000119413
91500-24		0.282314	3.47549e-05	0.000296479	7.71707e-07	0.0107502	0.000257284	1.46695	4.7852e-05	1.88826	0.000127179
91500-25		0.282296	3.10234e-05	0.000297004	7.53552e-07	0.0107345	0.000264995	1.46694	4.93332e-05	1.88834	0.000104293
91500-26		0.282322	3.27546e-05	0.000298168	8.41241e-07	0.0107627	0.000248398	1.46698	5.88713e-05	1.88843	0.000102412
91500-27		0.282313	3.25804e-05	0.000299351	9.551e-07	0.0109656	0.000240378	1.46692	6.03723e-05	1.88842	0.000133122
91500-28		0.282304	3.00881e-05	0.000305855	8.1035e-07	0.0113407	0.000285978	1.46694	7.0182e-05	1.88858	0.000201183
91500-29		0.282284	3.02977e-05	0.000305988	7.04233e-07	0.0115183	0.000303276	1.46689	3.95462e-05	1.88855	0.000107614
91500-30		0.282312	3.1181e-05	0.00030539	7.75209e-07	0.0114444	0.000257474	1.46691	5.80934e-05	1.8885	0.00011041
91500-31		0.282312	3.20444e-05	0.000305509	8.23593e-07	0.011512	0.000268822	1.46692	5.10623e-05	1.88878	0.000126014
91500-32		0.282342	3.45596e-05	0.000340318	4.96969e-06	0.0107505	7.49481e-05	1.46688	6.27177e-05	1.8886	0.000156429
Mean values ± 2sd		0.282311	2.84485e-05	0.000302882	2.73474e-05
2022 February zircon laser ablatiob split-stream analysis
Plešovice (primary reference material)
PL-1		0.282474	2.18395e-05	9.74722e-05	2.58276e-06	0.00434576	8.64585e-05	1.46723	4.52791e-05	1.88705	0.000103472
PL-2		0.282466	2.12537e-05	9.8487e-05	2.66344e-06	0.00442771	9.22831e-05	1.46722	4.37368e-05	1.88702	9.41297e-05
PL-3		0.282498	1.86928e-05	9.65242e-05	2.50747e-06	0.00433364	7.70071e-05	1.46719	3.27684e-05	1.88696	9.05852e-05
PL-4		0.282495	2.00773e-05	9.68124e-05	2.65982e-06	0.00440999	8.19236e-05	1.46722	4.30906e-05	1.887	9.42403e-05
PL-5		0.282463	2.13629e-05	9.70292e-05	2.55705e-06	0.00446398	7.53348e-05	1.46719	4.23793e-05	1.88709	0.000117604
PL-6		0.28251	1.76931e-05	9.80224e-05	2.67269e-06	0.00451663	7.50927e-05	1.46721	4.47401e-05	1.88706	0.000145067
PL-7		0.282464	2.23915e-05	9.54186e-05	2.3754e-06	0.00429941	7.46013e-05	1.46721	4.9657e-05	1.88709	0.000118578
PL-8		0.282479	2.15336e-05	9.59556e-05	2.3885e-06	0.00436997	7.30649e-05	1.4672	4.20061e-05	1.88702	8.69919e-05
PL-9		0.282479	2.31091e-05	9.68674e-05	2.47648e-06	0.00445876	7.19791e-05	1.46721	4.08674e-05	1.88712	0.000107308
PL-10		0.282461	2.14894e-05	9.65807e-05	2.4763e-06	0.00452299	7.03279e-05	1.4672	4.63661e-05	1.88703	0.000114112
PL-11		0.282484	2.41191e-05	9.95239e-05	2.78892e-06	0.0046547	8.19536e-05	1.46724	4.30945e-05	1.88706	0.000115615
PL-12		0.282479	2.35821e-05	9.96377e-05	2.80935e-06	0.00461846	8.24271e-05	1.4672	3.23322e-05	1.88712	0.000113393
PL-13		0.282485	2.42882e-05	9.99659e-05	2.88794e-06	0.00463897	9.35292e-05	1.46723	4.9119e-05	1.88701	9.75075e-05
PL-14		0.282488	1.996e-05	9.85345e-05	2.74442e-06	0.00449857	8.92015e-05	1.46719	4.07415e-05	1.887	0.000102559
PL-15		0.282478	1.93069e-05	9.73308e-05	2.56675e-06	0.00439904	9.38943e-05	1.4672	4.02939e-05	1.88709	8.4448e-05
PL-16		0.282482	1.8596e-05	9.58071e-05	2.41927e-06	0.00435673	8.43676e-05	1.46724	3.93935e-05	1.88711	9.11009e-05
PL-17		0.28247	2.26056e-05	9.70263e-05	2.72242e-06	0.00452457	9.14424e-05	1.46723	4.09259e-05	1.88718	0.000134783
PL-18		0.282486	2.40629e-05	9.74805e-05	2.66628e-06	0.00447697	8.79184e-05	1.46724	4.03435e-05	1.8871	0.000118094
PL-19		0.28249	2.1256e-05	9.92533e-05	2.89959e-06	0.00459132	9.34483e-05	1.46715	3.88199e-05	1.88702	9.95499e-05
PL-20		0.282486	1.82731e-05	0.000101312	2.99969e-06	0.0046758	9.54798e-05	1.46721	4.28214e-05	1.88711	9.77824e-05
Mean values ± 2sd		0.282481	2.47958e-05	9.77521e-05	3.11618e-06
FC1
FC1-1		0.282169	3.04129e-05	0.00127892	6.93755e-06	0.0429084	0.000714238	1.46723	4.01853e-05	1.88701	8.48239e-05
FC1-2		0.282207	2.69964e-05	0.00138021	1.08277e-06	0.0471298	0.000464227	1.46723	3.84309e-05	1.88705	9.76978e-05
FC1-3		0.282206	3.2583e-05	0.00131539	3.40014e-05	0.0452037	0.000645016	1.46726	4.00236e-05	1.88709	0.000114277
FC1-4		0.282181	2.14205e-05	0.000922904	1.55683e-06	0.0307003	0.000341306	1.46722	4.63678e-05	1.88709	7.78771e-05
FC1-5		0.282189	2.31909e-05	0.00120926	4.49871e-05	0.0399107	0.00111751	1.46724	5.77652e-05	1.88702	0.00011196
FC1-6		0.28218	3.16704e-05	0.00150837	5.03763e-06	0.0510528	0.00065713	1.46719	4.03818e-05	1.88708	8.85017e-05
FC1-7		0.282208	3.10676e-05	0.00141344	4.23421e-06	0.0486983	0.000498234	1.4672	4.79008e-05	1.88704	0.00011515
FC1-8		0.282178	2.4678e-05	0.00123372	3.74436e-06	0.0418061	0.000383518	1.46721	4.30615e-05	1.88711	0.000106317
FC1-9		0.282182	2.38489e-05	0.0012268	1.8666e-06	0.0422852	0.000494944	1.4672	3.87294e-05	1.88716	9.18855e-05
FC1-10		0.282173	2.41259e-05	0.000782578	1.38112e-06	0.0267798	0.00038578	1.4672	5.04367e-05	1.88708	0.000111986
Mean values ± 2sd		0.282187	2.93778e-05	0.00122716	0.000441339
GJ1
GJ1-1		0.282018	3.27436e-05	0.000238657	8.22604e-07	0.00709329	7.39427e-05	1.46726	4.55707e-05	1.88706	0.000124739
GJ1-2		0.282015	2.49081e-05	0.000239532	7.42943e-07	0.00716154	6.53948e-05	1.46719	4.4775e-05	1.88708	0.000122498
GJ1-3		0.282034	3.88958e-05	0.0002415	3.96035e-06	0.00735664	0.000132445	1.46708	9.21357e-05	1.88683	0.000173986
GJ1-4		0.281996	3.92988e-05	0.000239684	2.83179e-06	0.00734254	0.000122773	1.46718	0.000103109	1.88712	0.000196779
GJ1-5		0.282001	4.14215e-05	0.000238641	1.67748e-06	0.00735271	0.000152943	1.46724	8.042e-05	1.88707	0.000201966
GJ1-6		0.282003	3.82682e-05	0.00023876	1.26756e-06	0.00736714	0.000211998	1.46725	7.02271e-05	1.88705	0.000181435
GJ1-7		0.282024	4.3817e-05	0.000242199	1.94315e-06	0.00721516	7.54308e-05	1.4672	4.26013e-05	1.88706	0.000151198
GJ1-8		0.282041	3.75982e-05	0.000249965	6.35464e-06	0.00738582	0.000119111	1.46723	6.09726e-05	1.88705	0.000134932
GJ1-9		0.282021	2.50715e-05	0.000240132	6.93632e-07	0.00721796	6.51829e-05	1.46722	5.4993e-05	1.88712	0.000124955
GJ1-10		0.282	2.93476e-05	0.000240198	7.42589e-07	0.00732468	6.86187e-05	1.46718	6.15303e-05	1.88708	0.000102262
Mean values ± 2sd		0.282015	3.03787e-05	0.000240927	6.77772e-06
91500
91500-1		0.282313	3.78506e-05	0.000332344	7.84316e-07	0.00996818	0.000178952	1.46719	6.17621e-05	1.88707	0.000164084
91500-2		0.282335	3.76196e-05	0.00033501	1.55168e-06	0.0100615	0.000127097	1.46721	5.3654e-05	1.88698	0.000173672
91500-3		0.282323	3.96769e-05	0.000330163	2.31019e-06	0.0100619	9.95086e-05	1.46717	8.62619e-05	1.88704	0.000160338
91500-4		0.282323	3.84207e-05	0.000346178	6.9442e-06	0.0103382	0.00011605	1.46711	8.11783e-05	1.88694	0.000173683
91500-5		0.282314	4.05209e-05	0.000333637	1.74645e-06	0.0100812	6.08274e-05	1.46721	4.97752e-05	1.88697	0.000147618
91500-6		0.282269	4.01273e-05	0.000329107	1.80703e-06	0.0100327	8.00991e-05	1.46718	5.69306e-05	1.88704	0.000115468
91500-7		0.282304	3.86053e-05	0.00033209	2.06523e-06	0.0102455	7.62705e-05	1.46718	6.20066e-05	1.88712	0.000110572
91500-8		0.282311	2.96562e-05	0.000327396	1.23151e-06	0.0100047	0.000107066	1.46722	6.15593e-05	1.88705	0.000149024
91500-9		0.282307	3.56018e-05	0.000327774	1.58132e-06	0.0103282	6.60485e-05	1.46717	6.15929e-05	1.88708	0.000154551
91500-10		0.282335	3.61226e-05	0.000328298	4.76044e-07	0.0102532	0.000121487	1.46719	4.97399e-05	1.88703	0.000140335
Mean values ± 2sd		0.282313	3.79605e-05	0.0003322	1.10949e-05
*Ratios and associated uncertainties were reduced using the in-house customized Hf isotope data reduction scheme of the Iolite 4.7.1 program.

## Sheet: Table S4
TABLE S4. SUMMARY OF U-PB ISOTOPE FOR ZIRCON SAMPLES
					Data for Tera-Wasserburg Plot						Data for Wetherill Plot						Date						Discordance (%)
Sample	Method		Th/U		238U/206Pb	1se (%)	207Pb/206Pb	1se (%)	Rho7/6-8/6		207Pb/235U	1se (%)	206Pb/238U	1se (%)	Rho6/8-7/5		207Pb/235U date (Ma)	2se	206Pb/238U date (Ma)	2se	207Pb/206Pb date (Ma)	2se
20-TWC-17 amphibolite Tobacco Root Mountains
1.7-Ga group
20-TWC-17-1	SS		0.0796279		3.26458	0.460907	0.108838	0.541484	0.322326		4.61223	0.599556	0.308083	0.461705	0.486629		1748.31	9.57	1722.56	13.63	1779.24	19.3	3.18563
20-TWC-17-3	SS		0.0735184		3.25216	0.413971	0.10794	0.362782	0.269823		4.58577	0.458056	0.309455	0.416186	0.644889		1744.58	7.63	1728.33	12.18	1764.11	12.89	2.02822
20-TWC-17-4	SS		0.0827451		3.30885	0.383102	0.107707	0.399395	0.334137		4.50044	0.44769	0.303861	0.384889	0.561581		1728.41	7.33	1702.31	11.14	1760.16	14.33	3.28663
20-TWC-17-5	SS		0.0727941		3.76162	0.809218	0.107841	0.599601	0.231165		3.98039	0.870674	0.268239	0.793863	0.751018		1624.21	14.13	1519.67	21.49	1762.43	21.49	13.7742
20-TWC-17-6	SS		0.126072		3.22229	0.298651	0.10869	0.371533	0.311091		4.67983	0.403172	0.311113	0.300585	0.46894		1758.06	6.51	1742.37	8.98	1776.75	13.23	1.93499
20-TWC-17-7	SS		0.0401454		3.53615	0.251085	0.107265	0.225194	0.252669		4.21078	0.275504	0.283361	0.248223	0.683468		1670.21	4.72	1605.42	6.96	1752.64	8.25	8.3999
20-TWC-17-9	SS		0.0989149		3.42006	0.331565	0.108242	0.341426	0.346611		4.31788	0.385925	0.292801	0.337898	0.565004		1705.14	6.2	1653.47	9.43	1769.22	12.17	6.54243
20-TWC-17-10	LASS		0.177305		3.10366	1.21043	0.1093	1.64684	0.21046		4.86	1.74897	0.3222	1.21043	0.31753		1794.21	30.15	1800.45	37.27	1786.96	58.82	-0.754913
20-TWC-17-11	LASS		0.144928		3.22685	1.06486	0.1082	1.20148	0.21056		4.64	1.2931	0.3099	1.06486	0.30212		1753.12	23.36	1740.24	31.83	1768.51	43.01	1.59852
20-TWC-17-13	LASS		0.52356		2.83366	1.55852	0.1079	1.94625	0.21582		5.2	2.21154	0.3529	1.55852	0.49555		1860.41	37.03	1948.41	51.36	1763.43	69.71	-10.4898
20-TWC-17-14	LASS		0.167224		3.06372	1.17953	0.1054	1.42315	0.088558		4.75	1.57895	0.3264	1.17953	0.39931		1774.58	29.03	1820.92	36.67	1720.48	51.25	-5.83791
20-TWC-17-15	LASS		0.175131		2.96209	1.24408	0.1065	1.50235	0.18881		4.96	1.6129	0.3376	1.24408	0.33156		1811.7	29.15	1875.11	39.67	1739.53	53.97	-7.79406
20-TWC-17-16	LASS		0.119048		3.01477	1.10039	0.106	1.17925	0.17551		4.82	1.24481	0.3317	1.10039	0.39891		1792.86	24.17	1846.6	34.63	1730.9	42.41	-6.68438
20-TWC-17-17	LASS		0.15015		3.04878	1.23476	0.1067	1.45267	0.10811		4.8	1.5625	0.328	1.23476	0.44994		1788.96	29.7	1828.67	38.53	1742.97	52.17	-4.91689
20-TWC-17-18	LASS		0.239234		2.8885	1.34315	0.1087	1.74793	0.18178		5.19	1.92678	0.3462	1.34315	0.44461		1850.38	33.39	1916.43	43.64	1776.92	62.51	-7.85123
20-TWC-17-20	LASS		0.0769231		3.64299	1.03825	0.1097	1.09389	0.15522		4.16	1.20192	0.2745	1.03825	0.35067		1664.22	22.23	1563.6	28.25	1793.61	39.04	12.8239
																			Weighted mean date (Ma)		1762	10	(95% conf.)
																			MSWD (n = 16)		1.5
20-TWC-27 quartzofeldspathic gneiss Tobacco Root Mountains
2.4-Ga group
20-TWC-27-3	SS		0.1398		3.54244	1.02297	0.152352	0.582043	0.276591		5.80458	1.06917	0.283868	1.04865	0.845845		1965.23	17.5	1602.89	28.45	2371.73	19.45	32.4168
20-TWC-27-7	SS		0.129467		2.49356	0.47458	0.158097	0.352608	0.401192		8.62925	0.465033	0.402111	0.479753	0.71888		2311.04	8.29	2173.79	17.16	2434.65	11.71	10.7145
20-TWC-27-9	SS		0.0830626		2.82625	0.513577	0.152051	0.383853	0.680163		7.37831	0.510258	0.354646	0.518415	0.582962		2162.73	6.63	1952.84	16.96	2368.35	12.83	17.5443
20-TWC-27-13	SS		0.120681		2.19977	0.342209	0.156567	0.248695	0.362093		9.90524	0.336176	0.455593	0.337952	0.733384		2417.01	6.19	2415.64	13.51	2418.16	8.27	0.104211
20-TWC-27-28	SS		0.0861203		2.49487	0.332887	0.152197	0.307533	0.393089		8.4847	0.351666	0.401267	0.332931	0.600788		2275.98	6.29	2172.83	12.03	2369.99	10.28	8.31902
20-TWC-27-34	SS		0.0546032		3.56768	0.651492	0.153046	0.492402	0.604433		5.88751	0.528235	0.280812	0.645072	0.665099		1963.01	8.99	1592.84	18.02	2379.47	16.45	33.059
20-TWC-27-42	SS		0.0680416		7.04041	1.07707	0.157598	0.427276	0.344001		3.09416	1.0729	0.14312	1.13799	0.929672		1428.97	15.22	856.17	16.93	2429.29	14.2	64.7564
20-TWC-27-43	SS		0.0585635		2.68906	0.642451	0.153972	0.424455	0.394985		7.88012	0.594078	0.372489	0.609458	0.759701		2218.68	10.85	2038.23	22	2389.75	14.16	14.7095
20-TWC-27-48	LASS		0.170633		2.58402	0.294361	0.156371	0.232224	0.270587		8.29842	0.331904	0.387341	0.295463	0.721164		2268.68	5.72	2108.87	10.38	2416.03	7.73	12.7134
20-TWC-27-54	LASS		0.110747		4.282	0.419225	0.151117	0.149895	0.356881		4.87386	0.383431	0.234694	0.416722	0.927005		1796	6.46	1353	10.03	2357.83	5.02	42.6167
20-TWC-27-70	LASS		0.841102		3.84679	0.527759	0.154526	0.425952	0.121184		5.44178	0.647465	0.260403	0.540843	0.761516		1906.23	10.73	1489.62	13.76	2395.86	14.2	37.8252
20-TWC-27-79	LASS		0.0429924		4.12877	0.342572	0.15086	0.251883	0.260779		5.03877	0.366725	0.242523	0.344743	0.754062		1825.34	6.12	1398.14	8.44	2354.92	8.43	40.629
20-TWC-27-85	LASS		0.0888725		4.00084	0.309888	0.155401	0.224872	0.254673		5.30524	0.326022	0.250276	0.313963	0.765965		1877.39	5.59	1438.21	7.83	2405.46	7.49	40.2106
20-TWC-27-88	LASS		0.122767		3.16241	0.195673	0.155003	0.155071	0.351625		6.80559	0.208678	0.316206	0.196603	0.711746		2079.85	3.51	1771.21	5.94	2401.1	5.17	26.2334
1.7-Ga group
20-TWC-27-6	SS		0.0262292		4.06942	0.683082	0.106065	0.470051	0.128223		3.52858	0.769045	0.246275	0.684143	0.965676		1547.78	12.11	1416.45	17.02	1732.03	16.9	18.2202
20-TWC-27-14	SS		0.0586288		19.2248	1.27442	0.105487	0.883414	0.370819		0.763255	1.56926	0.0519957	1.4388	0.877061		571.82	10.74	326.89	7.96	1722	31.81	81.0168
20-TWC-27-20	SS		0.0657582		3.62357	0.386576	0.10607	0.229899	0.334516		4.03197	0.388455	0.276468	0.390042	0.811955		1641.13	6.03	1571.04	10.56	1732.12	8.27	9.29959
20-TWC-27-30	SS		0.0597401		3.61082	0.374935	0.10586	0.365944	0.359728		4.07676	0.42079	0.277355	0.376262	0.584359		1642.38	6.69	1575.96	10.27	1728.48	13.17	8.82394
20-TWC-27-31	SS		0.0436775		8.82571	0.533743	0.105487	0.540899	-0.168495		1.64171	0.82167	0.113564	0.533992	0.759608		988.49	10.17	691.92	6.86	1722	19.48	59.8188
20-TWC-27-38	SS		0.12026		5.78369	0.447357	0.105661	0.294141	0.0588233		2.51737	0.526129	0.173183	0.455902	0.831797		1277.18	7.42	1028.07	8.33	1725.02	10.59	40.4024
20-TWC-27-41	SS		0.102833		3.23281	0.26008	0.10671	0.210068	0.283664		4.54734	0.285109	0.309653	0.259403	0.701462		1740.01	4.64	1737.4	7.76	1743.15	7.54	0.329863
20-TWC-27-46	LASS		0.111079		17.9806	2.07433	0.10674	0.922828	-0.849549		0.834194	2.67908	0.0566809	1.94322	0.982974		607.01	25.97	348.91	13.81	1743.65	33.14	79.9897
20-TWC-27-51	LASS		0.039097		5.15995	0.744764	0.105852	0.248115	-0.00738486		2.84717	0.774352	0.19611	0.732039	0.945435		1362.78	11.57	1141.93	15.28	1728.33	8.93	33.9287
20-TWC-27-57	LASS		0.0477256		4.76217	0.322341	0.106236	0.147764	0.129634		3.09903	0.334738	0.210926	0.339966	0.902648		1426.35	5.06	1228.76	7.07	1734.97	5.31	29.1769
20-TWC-27-59	LASS		0.0797101		21.7486	1.37566	0.106904	0.75836	-0.706269		0.699359	1.85736	0.0468458	1.27755	0.957226		525.22	15.96	289.79	7.64	1746.47	27.22	83.4071
20-TWC-27-60	LASS		0.0521506		8.51271	1.05119	0.105771	0.165534	-0.317075		1.80148	1.08543	0.12274	1.01676	0.988675		1013.18	14.01	715.99	13.96	1726.93	5.96	58.5397
20-TWC-27-65	LASS		0.0897308		3.64712	0.281506	0.106361	0.168312	0.206024		4.04719	0.286974	0.274853	0.274621	0.817812		1638.09	4.73	1562.03	7.65	1737.14	6.05	10.0804
20-TWC-27-78	LASS		0.0548344		4.7531	0.442078	0.105763	0.276642	-0.125294		3.07193	0.487492	0.210511	0.425651	0.893025		1424.4	8.26	1230.89	9.71	1726.8	9.95	28.7184
20-TWC-27-89	LASS		0.054563		6.52954	0.596849	0.106432	0.24471	-0.14522		2.27779	0.663762	0.15439	0.587228	0.928067		1195.68	9.33	918.6	10.02	1738.37	8.79	47.1574
																			Weighted mean date (Ma)		1733	9	(95% conf.)
																			MSWD (n = 15)		1.6
inherited
20-TWC-27-25	SS		1.09411		2.13045	0.254728	0.162312	0.179932	0.353879		10.5565	0.25157	0.470285	0.257035	0.746491		2479.91	4.63	2480.86	10.28	2479.13	5.95	-0.0697825
20-TWC-27-52	LASS		0.421551		2.33095	0.198653	0.173942	0.154741	-0.00833288		10.2328	0.247923	0.429365	0.19673	0.796761		2460.7	4.59	2301.25	7.54	2595.19	5.06	11.3263
mixing
20-TWC-27-4	SS		0.0800275		5.45934	0.49099	0.1487	0.391117	0.44881		3.68059	0.477191	0.183513	0.492389	0.67459		1582.94	7.4	1084.28	9.6	2330.26	13.13	53.4696
20-TWC-27-10	SS		0.0728906		17.9594	0.915661	0.110226	0.697838	-0.244083		0.844532	1.24608	0.0559077	0.906086	0.837392		622.37	11.67	349.31	6.1	1802.31	24.88	80.6188
20-TWC-27-18	SS		0.0741389		3.42073	0.231437	0.107092	0.176229	0.408075		4.32811	0.228106	0.292808	0.233796	0.704845		1696.16	3.66	1653.19	6.61	1749.69	6.32	5.51526
20-TWC-27-23	SS		0.0964287		3.47601	0.671172	0.14854	0.392414	0.218793		5.92529	0.69816	0.288365	0.676239	0.839829		1959.66	11.9	1629.95	18.95	2328.41	13.18	29.9973
20-TWC-27-27	SS		0.0867081		7.87966	0.559533	0.133571	0.191574	-0.0670936		2.37377	0.637892	0.127748	0.583446	0.949871		1223.37	8.41	770.21	7.96	2144.65	6.56	64.0869
20-TWC-27-29	SS		0.278438		2.54934	0.730205	0.134308	0.479796	0.456003		7.29949	0.662598	0.392829	0.736958	0.764148		2143.99	11.65	2133.29	25.99	2154.26	16.42	0.97342
20-TWC-27-32	SS		0.0608494		7.66641	0.541531	0.137886	0.367449	0.0439954		2.47553	0.640672	0.130703	0.540218	0.820555		1265.86	9.09	790.37	7.89	2200.05	12.51	64.0749
20-TWC-27-33	SS		0.0751187		3.281	0.605253	0.107306	0.281387	0.0435009		4.51163	0.613028	0.306821	0.553327	0.886472		1732.33	10.69	1714.99	17.86	1753.35	10.09	2.18781
20-TWC-27-35	SS		0.0854994		13.609	0.396326	0.10783	0.374808	0.519783		1.08496	0.389866	0.0735102	0.414472	0.577895		749.47	3.93	457.09	3.43	1762.25	13.43	74.0621
20-TWC-27-36	SS		0.0484381		4.6397	0.405553	0.109677	0.355424	0.225914		3.26074	0.503409	0.215803	0.403574	0.693605		1471.05	7.23	1258.22	9.09	1793.23	12.68	29.835
20-TWC-27-40	SS		0.0420413		3.90496	0.471869	0.129535	0.446865	0.405602		4.56965	0.519447	0.256479	0.473782	0.586527		1744.12	8.19	1469.78	12.15	2090.88	15.4	29.7052
20-TWC-27-49	LASS		0.113038		8.87631	0.259859	0.134054	0.230817	0.213812		2.06729	0.305329	0.112706	0.266924	0.676742		1142.69	4.15	688.17	3.32	2150.96	7.9	68.0064
20-TWC-27-55	LASS		0.0614975		4.59527	0.894406	0.147462	0.269278	-0.0253665		4.427	0.922384	0.218858	0.846635	0.956841		1716.57	15.27	1269.26	20.2	2315.92	9.05	45.1941
20-TWC-27-58	LASS		0.0677179		4.50961	0.304831	0.136442	0.164667	0.160107		4.19153	0.332123	0.22244	0.298247	0.864176		1668.11	5.18	1291.11	6.99	2181.74	5.62	40.822
20-TWC-27-63	LASS		0.0803017		3.72695	0.284449	0.108573	0.273459	0.340863		4.01325	0.320036	0.268563	0.286782	0.609806		1637.21	5.11	1532.25	7.6	1774.78	9.78	13.6654
20-TWC-27-68	LASS		0.0796093		17.636	0.385047	0.109968	0.490515	0.322111		0.849672	0.505487	0.0567721	0.391323	0.497167		629.77	4.75	355.54	2.61	1798.06	17.49	80.2265
20-TWC-27-72	LASS		0.0667446		9.97221	0.358658	0.118388	0.263716	0.132218		1.60556	0.420942	0.100495	0.359814	0.78059		984.23	5.14	616.04	4.13	1931.23	9.26	68.1012
20-TWC-27-73	LASS		0.103441		21.6832	1.56092	0.109157	0.708908	-0.94557		0.797516	2.58181	0.051746	1.88384	0.996009		535.08	18.29	290.65	8.69	1784.58	25.33	83.7133
20-TWC-27-74	LASS		0.0471996		5.93709	0.612219	0.108744	0.145558	-0.15497		2.50482	0.610421	0.170409	0.56699	0.970396		1279.05	9.28	1003.47	11.15	1777.66	5.2	43.5511
20-TWC-27-75	LASS		0.0584686		5.53842	0.238831	0.108905	0.178612	0.142129		2.67051	0.272231	0.180979	0.240449	0.746191		1331.2	4.03	1070.02	4.62	1780.36	6.38	39.8987
20-TWC-27-77	LASS		0.0701346		5.43151	0.212328	0.136509	0.213838	0.198655		3.48672	0.276728	0.18427	0.214224	0.634021		1519	4.17	1089.39	4.17	2182.6	7.29	50.0875
20-TWC-27-80	LASS		0.0631089		13.3352	0.619465	0.106881	0.273658	-0.381109		1.11196	0.746468	0.0758209	0.637937	0.941769		755.58	8.01	466.15	5.46	1746.08	9.82	73.3031
20-TWC-27-81	LASS		0.0429083		10.5886	0.442171	0.112739	0.177004	0.0437165		1.46933	0.472799	0.0951397	0.448226	0.922907		917.05	5.55	581.75	4.82	1843.22	6.28	68.4384
20-TWC-27-86	LASS		0.110494		3.43878	0.238819	0.10682	0.189778	0.269016		4.32629	0.256608	0.291253	0.235183	0.727285		1689.73	4.23	1645.53	6.8	1745.03	6.81	5.70191
20-TWC-27-87	LASS		0.0780055		8.11651	0.377116	0.150086	0.233911	0.364523		2.57463	0.368041	0.123376	0.378722	0.802353		1285.99	5.2	748.99	5.23	2346.13	7.84	68.0755
20-TWC-27-90	LASS		0.0812117		4.16726	0.217211	0.106738	0.181259	0.171973		3.53913	0.260164	0.240426	0.216946	0.708871		1533.96	4	1386.52	5.31	1743.62	6.51	20.4804
HM11-9 granitic gneiss Highland Mountains
1.7-Ga group
HM11-9-6	SS		0.417511		3.52218	0.476424	0.11078	0.32822	0.39528		4.24833	0.470968	0.284659	0.456226	0.734876		1699.98	7.42945	1611.05	13.311	1811.43	11.6873	11.0619
HM11-9-12	SS		0.583373		3.11877	0.45766	0.110245	0.449493	0.324225		4.90814	0.527132	0.321361	0.450644	0.584765		1797.38	8.70755	1792.85	14.0392	1802.63	16.0228	0.542654
HM11-9-14	SS		0.424778		3.11422	0.335615	0.110151	0.351894	0.36143		4.90051	0.393138	0.321543	0.344225	0.548832		1797.89	6.419	1795.14	10.3067	1801.08	12.5462	0.329959
HM11-9-17	SS		0.470315		3.18508	0.343762	0.110406	0.292872	0.302686		4.77156	0.383108	0.314499	0.348128	0.661203		1780.91	6.22302	1760.19	10.3782	1805.29	10.4365	2.49835
HM11-9-19	SS		0.170023		3.53099	0.298463	0.109848	0.217606	0.304731		4.26748	0.303094	0.283866	0.298781	0.743042		1690.96	5.02205	1607.49	8.32271	1796.07	7.76317	10.4994
HM11-9-20	SS		0.386294		3.21279	0.408645	0.110234	0.341756	0.338644		4.69967	0.444091	0.311841	0.415368	0.667142		1772.33	7.14535	1746.88	12.2558	1802.45	12.1827	3.08287
HM11-9-22	SS		0.480551		3.0858	0.356361	0.109766	0.374559	0.365468		4.85295	0.397036	0.324378	0.346181	0.520458		1802.67	6.80972	1809.55	11.0199	1794.71	13.3647	-0.826584
HM11-9-23	SS		0.184071		19.4784	3.15184	0.109466	0.367933	-0.173555		0.929255	3.50535	0.0625809	3.43405	0.994929		582.351	28.1089	322.736	19.4462	1789.73	13.1364	81.9673
HM11-9-24	SS		0.681011		3.08167	0.295518	0.110206	0.270206	0.262695		4.8184	0.368585	0.324465	0.308229	0.687414		1807.17	5.69255	1811.67	9.14772	1801.99	9.63266	-0.53687
HM11-9-25	SS		0.557793		3.57041	0.648134	0.11047	0.284632	0.157406		4.18798	0.663712	0.282438	0.634666	0.901442		1686.47	10.7298	1591.76	17.9174	1806.34	10.1415	11.8793
HM11-9-26	SS		0.274318		3.85215	0.457338	0.110149	0.246433	0.143062		3.83761	0.497779	0.260539	0.464392	0.853541		1622.1	7.73793	1487.77	11.9088	1801.05	8.7862	17.3941
HM11-9-27	SS		0.410632		3.105	0.37077	0.111176	0.373537	0.347516		4.77864	0.44213	0.32225	0.377842	0.576869		1808.2	7.03505	1799.79	11.4119	1817.91	13.2904	0.99705
HM11-9-28	SS		0.188517		3.12961	0.519056	0.111098	0.369079	0.206198		4.76021	0.56051	0.320899	0.512712	0.767181		1800.95	9.44363	1787.43	15.8808	1816.63	13.1338	1.6077
HM11-9-29	SS		0.449413		3.57202	0.474466	0.11032	0.299296	0.255507		4.14237	0.494815	0.28101	0.482119	0.779117		1684.98	7.92969	1591.13	13.1118	1803.87	10.6673	11.7937
HM11-9-30	SS		0.499018		3.13985	0.313865	0.109796	0.228804	0.229526		4.71027	0.331834	0.319194	0.306416	0.757545		1788.27	5.65901	1782.33	9.57908	1795.2	8.16351	0.71693
HM11-9-31	SS		0.778294		4.0797	0.606127	0.109322	0.268375	0.141908		3.64285	0.617932	0.246399	0.598303	0.902171		1569.87	9.82066	1413.24	15.0762	1787.32	9.58469	20.9297
HM11-9-32	SS		0.166427		4.13141	0.365513	0.11044	0.24901	0.214841		3.84224	0.392426	0.242768	0.366536	0.765593		1567.93	6.19209	1397.34	8.99978	1805.85	8.87282	22.6216
HM11-9-35	SS		0.534226		3.37918	0.4354	0.110378	0.25646	0.247086		4.81594	0.460319	0.296502	0.435426	0.836796		1731.29	7.28536	1671.1	12.5621	1804.82	9.13946	7.4092
HM11-9-36	SS		0.57035		3.30299	0.428361	0.110314	0.242195	0.160701		4.93386	0.47228	0.303956	0.429886	0.862199		1749.79	7.47083	1704.96	12.5778	1803.78	8.63219	5.47831
HM11-9-38	SS		0.578915		3.65912	0.427563	0.110634	0.307273	0.267171		4.44979	0.419429	0.273804	0.424578	0.739084		1667.55	7.30254	1557.48	11.5948	1809.04	10.9446	13.9056
HM11-9-40	SS		0.235586		3.57988	0.503424	0.11054	0.340979	0.247409		4.4778	0.529301	0.280465	0.512771	0.79348		1684.81	8.59919	1588.03	13.8882	1807.49	12.1475	12.1417
HM11-9-51	LASS		0.852099		5.03905	0.323025	0.109857	0.282144	0.290923		3.01612	0.361329	0.198779	0.315842	0.654117		1408.79	5.40269	1166.99	6.75825	1796.22	10.0654	35.0308
HM11-9-53	LASS		0.285244		3.55428	0.390643	0.111128	0.374504	0.22206		4.63639	0.470411	0.281723	0.393295	0.687106		1695.09	7.71075	1598.16	10.8374	1817.13	13.3261	12.0501
HM11-9-55	LASS		0.294263		3.77141	0.504866	0.111428	0.499749	0.181527		4.76414	0.662245	0.265829	0.505032	0.650361		1648.69	10.2683	1516.15	13.3689	1822.02	17.772	16.7875
HM11-9-57	LASS		0.579369		8.41845	0.830788	0.109097	0.621632	-0.0110507		2.28744	1.04045	0.118898	0.798647	0.843193		1040.38	13.3078	723.577	11.1449	1783.57	22.2111	59.431
HM11-9-58	LASS		0.280026		3.72608	0.416917	0.1105	0.429497	0.110458		5.30131	0.546259	0.268968	0.411474	0.628772		1651.73	9.02679	1532.57	11.1459	1806.83	15.3022	15.1792
HM11-9-61	LASS		0.129896		5.15614	1.27597	0.110101	0.689052	-0.129637		3.53166	1.49132	0.196394	1.27738	0.87962		1393.01	22.6775	1142.7	26.1878	1800.25	24.5695	36.5254
HM11-9-63	LASS		0.5535		6.43578	1.47569	0.109414	0.41552	0.0594399		1.75551	1.56612	0.159826	1.48445	0.965587		1225.44	21.0493	931.059	25.0747	1788.86	14.837	47.9525
HM11-9-64	LASS		0.25577		3.71475	0.494895	0.109736	0.335781	0.232842		2.98706	0.559274	0.269973	0.491159	0.803864		1648.56	8.45843	1536.72	13.2624	1794.22	11.9818	14.3512
HM11-9-65	LASS		0.672751		3.73833	0.281118	0.110031	0.349925	0.327559		3.05024	0.371531	0.267838	0.280285	0.443684		1645.59	5.91	1528.09	7.49601	1799.11	12.479	15.0636
HM11-9-67	LASS		0.277022		3.48851	0.262194	0.110664	0.286373	0.140336		3.52718	0.350895	0.286981	0.266476	0.611935		1707.05	5.83255	1624.79	7.38052	1809.52	10.1996	10.2087
HM11-9-68	LASS		0.690777		3.26642	0.322382	0.110044	0.297155	0.127405		3.93405	0.423662	0.306756	0.323749	0.690125		1757.04	6.70796	1721.71	9.54715	1799.31	10.5969	4.31287
HM11-9-69	LASS		0.522992		3.14518	0.329004	0.109998	0.339245	0.367994		4.20637	0.398816	0.318283	0.337337	0.615617		1788.39	6.19292	1779.69	10.0282	1798.56	12.0989	1.04879
HM11-9-70	LASS		0.51548		3.76498	0.288225	0.110225	0.265494	0.333703		3.70386	0.316141	0.265794	0.296623	0.640694		1641.24	5.10573	1518.46	7.64253	1802.3	9.46433	15.7488
HM11-9-71	LASS		0.391258		3.60264	0.327608	0.110375	0.465366	0.344908		4.05959	0.444144	0.277871	0.323923	0.356707		1678.38	7.52517	1579.13	8.99319	1804.78	16.5843	12.5029
HM11-9-74	LASS		0.235863		4.60366	0.319015	0.110659	0.22572	0.24245		3.01201	0.343065	0.217613	0.315296	0.764389		1484.06	5.24677	1267.16	7.19294	1809.45	8.03942	29.9698
HM11-9-77	LASS		0.352644		3.91528	0.301118	0.109854	0.369756	0.0952128		3.36904	0.458324	0.255825	0.301646	0.588706		1606.79	7.17993	1466.31	7.74024	1796.16	13.191	18.3642
																			Weighted mean date (Ma)		1802	10	(95% conf.)
																			MSWD (n = 37)		1.7
inherited
HM11-9-42	SS		0.10817		1.86058	0.528878	0.200273	0.31589	0.384133		15.1031	0.49674	0.538986	0.524085	0.816342		2804.7	9.34352	2772.83	23.3597	2827.69	10.1034	1.94002
HM11-9-76	LASS		0.305831		2.81469	0.303713	0.157572	0.261707	0.0371636		6.7755	0.390569	0.355929	0.300073	0.746854		2198.39	6.93216	1959.75	10.0594	2429.01	8.6962	19.3187
HM11-9-81	LASS		0.133938		2.22142	0.431874	0.200116	0.413735	0.279199		11.3316	0.508249	0.450722	0.429211	0.630307		2636.34	9.3535	2395.98	16.9385	2826.41	13.2345	15.229
mixing
HM11-9-3	SS		0.805857		3.11405	0.496255	0.115554	0.356546	0.344176		5.02989	0.503931	0.322977	0.499542	0.757187		1838.44	8.34965	1795.22	15.2406	1887.73	12.5791	4.90043
HM11-9-9	SS		0.812208		2.98544	0.570265	0.117453	0.408522	0.161413		5.36035	0.651369	0.336551	0.562346	0.780585		1888.34	10.8486	1862.37	18.0787	1917.02	14.3625	2.85069
HM11-9-33	SS		0.605212		2.93859	0.64835	0.123688	0.476593	0.183971		6.12301	0.729458	0.341897	0.639693	0.765629		1946.54	12.4022	1888.11	20.7986	2009.29	16.5755	6.03118
HM11-9-72	LASS		0.204755		3.0594	0.503795	0.118164	0.540946	-0.0963957		5.33123	0.760091	0.328644	0.495126	0.697731		1872.56	12.9663	1823.15	15.6804	1927.84	18.9938	5.43043
20-TWC-26 gedrite gneiss Northern Madison Range
2.4-Ga group
20-TWC-26-4	LASS		0.00400982		2.2478	0.240251	0.15828	0.165224	0.159786		10.3563	0.278732	0.445559	0.243436	0.801021		2407.14	4.85	2372.45	9.35	2436.61	5.49	2.63317
20-TWC-26-5	LASS		0.00458171		2.21641	0.257714	0.157869	0.163941	0.0893241		10.4913	0.280287	0.452177	0.254393	0.812747		2417.69	5.29	2400.5	10.12	2432.2	5.45	1.30335
20-TWC-26-8	LASS		0.173009		2.07796	0.276437	0.157718	0.356897	0.299667		11.1128	0.408361	0.48166	0.275768	0.507156		2476.42	6.91	2532.67	11.35	2430.58	11.86	-4.20023
20-TWC-26-10	LASS		0.23499		2.11129	0.186662	0.158375	0.236162	0.169395		10.981	0.270085	0.474068	0.188518	0.525554		2465.53	4.99	2499.52	7.58	2437.62	7.84	-2.53936
20-TWC-26-11	LASS		0.155345		2.18928	0.185905	0.157455	0.194884	0.235478		10.4959	0.242444	0.457257	0.182626	0.602595		2426.62	4.26	2425.28	7.36	2427.75	6.48	0.10174
20-TWC-26-12	LASS		0.15143		2.19068	0.310867	0.158591	0.233554	-0.119246		10.5204	0.40669	0.457321	0.312292	0.845365		2432.67	7.42	2423.99	12.31	2439.93	7.75	0.653297
20-TWC-26-24	LASS		0.189352		2.44728	0.875684	0.157541	0.27341	0.108976		9.16217	0.824761	0.412859	0.811716	0.945011		2324.92	15.89	2208.6	32.1	2428.68	9.09	9.06171
																			Weighted mean date (Ma)		2433	13	(95% conf.)
																			MSWD (n = 7)		1.6
1.7-Ga group
20-TWC-26-6	LASS		0.00581694		3.72001	0.540058	0.109296	0.714888	0.499149		4.35625	0.64525	0.269189	0.534286	0.28736		1644.13	10.31	1534.79	14.46	1786.89	25.53	14.1083
20-TWC-26-13	LASS		0.0060095		3.41799	0.914112	0.109238	0.684205	0.405863		4.71093	1.03348	0.292993	0.931058	0.498111		1713.21	14.47	1654.36	26.14	1785.93	24.44	7.36703
mixing
20-TWC-26-2	LASS		0.0215003		2.52245	0.755131	0.155391	0.327071	0.0356688		9.02151	0.812982	0.398052	0.746443	0.90192		2284.86	14.46	2152.63	27.09	2405.35	10.89	10.5066
20-TWC-26-7	LASS		0.109183		3.42239	0.833106	0.129528	0.355665	-0.692019		5.7215	0.991929	0.299026	0.751168	0.964619		1855.24	18.53	1652.48	23.8	2090.77	12.26	20.9631
20-TWC-26-14	LASS		0.00589537		3.68295	0.245855	0.147318	0.174273	0.0437985		5.76014	0.294729	0.272128	0.240797	0.789741		1902.58	4.97	1548.52	6.63	2314.26	5.86	33.0879
20-TWC-26-15	LASS		0.0033686		4.94321	0.542503	0.141508	0.18781	0.0452334		4.16975	0.575119	0.204218	0.564822	0.946224		1623.02	8.99	1187.65	11.53	2244.97	6.36	47.0973
20-TWC-26-16	LASS		0.0108586		3.86839	0.6255	0.152134	0.365672	0.185771		5.75083	0.703256	0.259322	0.637906	0.856776		1888.03	11.14	1482.19	16.23	2369.28	12.23	37.4413
20-TWC-26-17	LASS		0.0128636		3.71691	0.502098	0.147131	0.463382	0.251651		5.78197	0.587207	0.269596	0.513361	0.643588		1893.61	9.95	1535.93	13.45	2312.07	15.59	33.5691
20-TWC-26-21	LASS		0.00597749		3.17381	0.607513	0.153889	0.46429	0.15258		6.98519	0.694263	0.316204	0.599111	0.757312		2070.3	12.22	1765.65	18.39	2388.83	15.49	26.0872
20-TWC-26-25	LASS		0.0421987		5.31514	0.86991	0.146954	0.384376	0.0612327		3.89315	0.903783	0.189236	0.833523	0.908709		1594.95	14.65	1111.3	17.4	2310.01	12.93	51.892
20-TWC-12 amphibolite Ruby Range
2.7-Ga group
20-TWC-12-10	SS		0.515342		1.87217	0.66951	0.189136	0.474798	0.576688		13.9814	0.530566	0.535952	0.658042	0.695389		2744.49	10.2885	2758.87	29.4519	2733.92	15.3164	-0.912518
20-TWC-12-20	SS		0.493501		1.89473	0.65433	0.191173	0.479813	-0.158517		13.9837	0.757432	0.530752	0.629816	0.817626		2743.29	16.1631	2732.1	28.5599	2751.54	15.453	0.706712
20-TWC-12-24	SS		0.619142		1.88577	0.561049	0.189866	0.462192	-0.246811		13.8467	0.739446	0.530357	0.569766	0.833364		2741.28	15.0397	2742.66	24.5643	2740.27	14.901	-0.0873551
20-TWC-12-41	SS		0.478548		1.88156	0.447758	0.193232	0.387074	0.209529		14.1625	0.487319	0.532117	0.450072	0.701824		2760.05	9.79501	2747.66	19.6328	2769.13	12.4461	0.775531
20-TWC-12-44	SS		0.652025		1.88162	0.692388	0.191969	0.57431	0.0799218		14.0661	0.862206	0.532992	0.695806	0.750783		2753.8	16.044	2747.58	30.3584	2758.36	18.4848	0.390852
																			Weighted mean date (Ma)		2745	18	(95% conf.)
																			MSWD (n = 5)		0.44
2.4-Ga group
20-TWC-12-6	SS		0.0937599		5.55057	1.15422	0.157442	0.342277	0.602239		3.99856	0.913298	0.183915	1.04454	0.95666		1615.59	15.6362	1067.86	22.2626	2427.61	11.3751	56.0119
20-TWC-12-34	SS		0.16922		2.81379	0.948031	0.15617	0.342593	0.228425		7.7033	0.931584	0.359018	0.938715	0.93422		2190.64	16.3952	1960.3	31.4074	2413.84	11.4016	18.7893
20-TWC-12-38	SS		0.0872563		4.25923	0.76357	0.157765	0.291359	-0.00559027		5.13502	0.806454	0.236986	0.760667	0.934532		1836.92	13.6257	1359.53	18.344	2431.09	9.67943	44.0775
20-TWC-12-43	SS		0.0452313		3.01987	0.811544	0.157055	0.552192	0.715889		7.18829	0.777405	0.329196	0.992464	0.646628		2132.47	9.9087	1843.9	25.5074	2423.44	18.3591	23.9137
20-TWC-12-48	SS		0.0657463		2.2512	0.559014	0.156398	0.492538	0.312363		9.48814	0.623161	0.444965	0.564177	0.716306		2394.74	11.1527	2369.45	21.7243	2416.32	16.3876	1.93984
20-TWC-12-56	LASS		0.0304712		2.57019	0.283553	0.156811	0.186126	0.285184		8.58309	0.286519	0.389512	0.284175	0.80851		2276.1	5.1837	2118.54	10.0348	2420.8	6.18989	12.4859
20-TWC-12-70	LASS		0.0110275		4.15233	0.65506	0.156644	0.289191	0.348647		5.10759	0.590514	0.241598	0.649543	0.889469		1852.47	10.2976	1391	16.0636	2418.99	9.61928	42.4965
20-TWC-12-71	LASS		0.1601		2.67348	0.441345	0.15684	0.228255	0.0934613		7.9684	0.47954	0.374697	0.445496	0.874002		2240.58	8.45774	2048.4	15.1798	2421.12	7.59074	15.3942
20-TWC-12-72	LASS		0.0359707		2.37001	0.25302	0.15707	0.118829	-0.0683922		9.04881	0.250319	0.422642	0.251003	0.920151		2351.5	5.14435	2269.28	9.48615	2423.6	3.95072	6.36753
20-TWC-12-78	LASS		0.0319022		4.74529	0.240022	0.157476	0.166146	0.367097		4.5562	0.244209	0.210951	0.245268	0.734227		1744.47	3.86232	1232.73	5.27845	2427.98	5.52141	49.2279
20-TWC-12-84	LASS		0.158865		3.30131	0.63734	0.156589	0.169263	0.271067		6.65632	0.598539	0.305354	0.629697	0.957726		2050.9	10.5892	1705.72	18.7214	2418.4	5.63049	29.4689
																			Weighted mean date (Ma)		2422	13	(95% conf.)
																			MSWD (n = 11)		1.4
1.7-Ga group
20-TWC-12-2	SS		0.0231666		6.26315	0.698899	0.109089	0.46398	0.446621		2.40072	0.636113	0.160433	0.701997	0.749593		1242.74	9.04019	954.91	12.1578	1783.44	16.5784	46.4567
20-TWC-12-7	SS		0.0383703		6.7024	0.417652	0.108544	0.256499	-0.00724366		2.25511	0.485619	0.149817	0.418848	0.80463		1191.13	6.75779	896.479	6.85102	1774.31	9.17527	49.4744
20-TWC-12-37	SS		0.018579		17.3826	0.625843	0.107588	0.462753	0.59076		0.852388	0.537992	0.0579349	0.650154	0.727915		626.303	4.70393	360.58	4.30155	1758.15	16.5865	79.4909
20-TWC-12-40	SS		0.0362143		19.6935	0.927938	0.10802	0.673571	-0.490831		0.767417	1.50777	0.051408	0.994555	0.920852		571.668	11.8973	319.298	5.66568	1765.47	24.1209	81.9143
20-TWC-12-59	LASS		0.0438903		7.90893	0.24369	0.108308	0.137199	0.166723		1.95024	0.254893	0.12674	0.239285	0.837211		1076.65	3.36869	767.521	3.45603	1770.33	4.9102	56.6454
20-TWC-12-82	LASS		0.0245092		16.405	2.23724	0.108694	0.428002	0.123904		0.984362	1.82845	0.065879	1.80619	0.96155		658.725	21.1359	381.444	16.2407	1776.83	15.3054	78.5323
20-TWC-12-96	LASS		0.016058		5.4753	0.359183	0.108333	0.204693	0.474518		3.20831	0.318736	0.182874	0.363144	0.818162		1335.8	4.63075	1081.37	7.00846	1770.75	7.32535	38.9315
																			Weighted mean date (Ma)		1771	10	(95% conf.)
																			MSWD (n = 7)		0.96
mixing (2.7-2.4 Ga)
20-TWC-12-1	SS		0.473014		1.9279	0.449705	0.186133	0.363586	0.415898		13.2785	0.454371	0.519736	0.454236	0.721649		2701.6	8.24529	2693.66	19.406	2707.55	11.7576	0.51327
20-TWC-12-4	SS		0.165913		2.11738	0.677128	0.164723	0.335175	0.317247		10.7284	0.627623	0.473265	0.688971	0.875466		2499.3	11.8928	2493.56	27.444	2503.97	11.0537	0.415733
20-TWC-12-54	LASS		0.586198		2.12406	0.233999	0.179397	0.187553	0.0782939		11.7167	0.28734	0.47151	0.231773	0.758418		2575.89	5.28175	2487.06	9.4637	2646.55	6.10005	6.02661
20-TWC-12-68	LASS		0.492406		2.03797	0.629125	0.18056	0.607157	-0.187274		11.8733	0.94519	0.492322	0.617365	0.783804		2620.71	17.5233	2573.63	26.1649	2657.28	19.7273	3.14783
20-TWC-12-91	LASS		0.342156		2.3601	0.282052	0.164754	0.352786	0.0733761		9.52962	0.414484	0.424226	0.291419	0.62074		2399.16	7.84571	2277.31	10.6058	2504.29	11.6341	9.06366
mixing (2.4-1.7 Ga)
20-TWC-12-3	SS		0.02981		4.10787	0.845081	0.155016	0.442075	0.320482		5.22488	0.837502	0.245412	0.848932	0.843604		1852.74	13.6641	1404.53	20.9038	2401.24	14.7314	41.5081
20-TWC-12-5	SS		0.0271805		3.60567	0.867098	0.152973	0.386518	0.741722		5.89664	0.796155	0.280029	0.842744	0.694225		1953.41	10.803	1577.96	23.7871	2378.67	12.91	33.6622
20-TWC-12-9	SS		0.0308924		5.61116	0.628473	0.110206	0.23538	0.337695		2.7482	0.612423	0.180281	0.64089	0.928857		1330.33	8.60325	1057.22	12.0109	1801.99	8.39113	41.3303
20-TWC-12-12	SS		0.0332329		2.79532	0.45448	0.154784	0.34218	0.107409		7.63131	0.539128	0.358188	0.468748	0.781204		2188.55	9.47923	1971.46	15.1298	2398.7	11.4055	17.8113
20-TWC-12-13	SS		0.0305851		4.82071	0.830517	0.139021	0.253555	0.531453		4.01857	0.702518	0.210549	0.822547	0.95229		1628.99	11.5781	1215.16	18.0276	2214.27	8.61796	45.1216
20-TWC-12-14	SS		0.162353		4.08823	1.27129	0.112499	0.412057	0.37021		3.80766	1.15345	0.246243	1.22153	0.924806		1591.14	18.6213	1410.59	31.5679	1839.35	14.6226	23.3105
20-TWC-12-17	SS		0.0306247		9.29653	0.626134	0.110172	0.439842	0.207896		1.63129	0.700662	0.107615	0.60558	0.793458		983.121	8.47128	658.603	7.68321	1801.43	15.6811	63.4401
20-TWC-12-18	SS		0.0558223		2.83537	0.707387	0.155986	0.330434	0.0423232		7.57731	0.755142	0.354429	0.690041	0.897567		2182.73	13.5028	1947.42	23.3032	2411.84	10.9992	19.256
20-TWC-12-19	SS		0.0198721		8.00546	0.577561	0.133099	0.298703	-0.0564522		2.29069	0.664013	0.125414	0.577914	0.897917		1209.63	9.21392	758.79	8.10323	2138.47	10.2375	64.5172
20-TWC-12-21	SS		0.0259269		6.09363	0.579561	0.127919	0.242246	0.407814		2.8975	0.528342	0.165406	0.580206	0.910003		1380.12	7.82662	979.554	10.3228	2068.78	8.36784	52.6507
20-TWC-12-26	SS		0.0437487		4.53225	0.579512	0.131258	0.381579	0.68607		3.9992	0.600406	0.221497	0.581419	0.685285		1632.43	6.71443	1285.26	13.2351	2114.07	13.1136	39.2045
20-TWC-12-28	SS		0.0330178		3.93256	0.518653	0.151126	0.341426	0.113151		5.29343	0.623492	0.254899	0.526959	0.837184		1868.26	9.83984	1460.55	13.2853	2357.94	11.4285	38.0583
20-TWC-12-32	SS		0.025228		5.54761	0.593687	0.15544	0.307633	0.296655		3.87415	0.565674	0.18086	0.602037	0.869753		1605.68	9.20025	1068.38	11.4562	2405.89	10.2464	55.593
20-TWC-12-33	SS		0.0107568		3.51936	0.428593	0.148938	0.344767	0.171612		5.85695	0.496433	0.286074	0.42964	0.743946		1951.24	8.52539	1612.19	11.9821	2332.99	11.5704	30.896
20-TWC-12-36	SS		0.0357806		5.06099	0.582569	0.144626	0.196841	0.222791		3.96814	0.564365	0.199587	0.569104	0.910144		1621.6	9.0763	1162.36	12.1442	2282.56	6.64132	49.0765
20-TWC-12-46	SS		0.0323724		3.28172	0.928825	0.109448	0.276285	0.0537796		4.61992	1.06882	0.308799	1.00784	0.956623		1748.6	15.6046	1714.66	27.4083	1789.42	9.86462	4.17765
20-TWC-12-51	SS		0.024776		3.92421	0.909419	0.112916	0.539172	0.863409		3.96981	0.838002	0.25621	0.889019	0.566573		1627.18	8.2742	1463.33	23.3342	1846.05	19.118	20.7319
20-TWC-12-52	SS		0.0464458		3.34628	1.23111	0.155628	0.368668	-0.200192		6.52173	1.46434	0.305014	1.34168	0.967878		2033.58	23.3093	1685.55	35.7888	2407.94	12.2768	30.0002
20-TWC-12-57	LASS		0.0360661		6.64587	0.743425	0.145569	0.159711	-0.0119586		3.14794	0.77346	0.153772	0.793254	0.977254		1412.36	11.3949	903.594	12.285	2293.74	5.38217	60.6061
20-TWC-12-58	LASS		0.0558731		4.57752	0.61948	0.152468	0.246207	-0.139277		4.74904	0.684532	0.219268	0.590928	0.929213		1747.53	11.4022	1273.73	14.0331	2373.02	8.22832	46.3246
20-TWC-12-60	LASS		0.0373104		6.28063	0.820978	0.110087	0.345199	0.0579761		2.51349	0.882449	0.160443	0.839093	0.916898		1247.27	12.2725	952.44	14.2472	1800.02	12.3091	47.0873
20-TWC-12-62	LASS		0.258025		3.15494	0.556924	0.152837	0.247987	-0.69017		6.96299	0.724989	0.320631	0.537572	0.965822		2069.5	12.9792	1774.88	16.9355	2377.14	8.28429	25.3355
20-TWC-12-64	LASS		0.03624		3.22256	0.231665	0.110285	0.136958	0.168222		4.53382	0.256226	0.310792	0.228988	0.845826		1770.18	4.08029	1742.25	6.93187	1803.29	4.88167	3.38544
20-TWC-12-65	LASS		0.0230331		7.56536	0.736178	0.112605	0.245447	-0.331114		1.99378	0.965461	0.133395	0.800654	0.969815		1132.73	11.3671	800.298	10.8593	1841.06	8.70836	56.5305
20-TWC-12-66	LASS		0.107409		3.93854	0.345803	0.147285	0.230971	-0.0153756		4.95977	0.42921	0.254403	0.345861	0.840727		1845.03	6.98002	1458.56	8.847	2313.87	7.76703	36.9643
20-TWC-12-67	LASS		0.026049		5.4692	0.38223	0.131956	0.179235	0.27741		3.21214	0.369055	0.183297	0.380259	0.874431		1486.97	5.72908	1082.48	7.46518	2123.37	6.15329	49.0206
20-TWC-12-69	LASS		0.021769		3.97759	0.709141	0.113511	0.319579	0.484328		3.84145	0.612106	0.252549	0.679638	0.88606		1620.5	9.85136	1445.74	18.0003	1855.56	11.3186	22.0861
20-TWC-12-73	LASS		0.0219081		3.54149	0.395074	0.132968	0.141865	0.301877		5.16299	0.379363	0.283724	0.399301	0.931122		1848.43	6.29296	1603.27	10.9912	2136.75	4.86309	24.9667
20-TWC-12-74	LASS		0.0600727		9.40706	0.304116	0.112391	0.222941	0.0693719		1.64672	0.366683	0.10647	0.304068	0.796001		988.24	4.51176	651.242	3.69213	1837.61	7.91317	64.5605
20-TWC-12-75	LASS		0.0346209		13.1625	0.722287	0.132424	0.281175	-0.188336		1.40464	0.904864	0.0769048	0.777688	0.949269		883.231	9.51525	472.045	6.44374	2129.57	9.64629	77.8338
20-TWC-12-76	LASS		0.0309393		2.62042	0.295743	0.156065	0.221596	0.364267		8.17663	0.319233	0.382116	0.298023	0.752242		2254.23	5.28708	2083.84	10.321	2412.71	7.37562	13.6307
20-TWC-12-77	LASS		0.0294528		5.50281	0.385294	0.155175	0.294243	0.659142		3.87477	0.27956	0.18216	0.382704	0.638588		1610.85	4.63033	1076.39	7.48613	2402.98	9.80338	55.2059
20-TWC-12-79	LASS		0.134865		3.60944	0.631892	0.150501	0.334998	0.201483		5.73099	0.640061	0.27783	0.617167	0.860355		1938.4	11.0666	1576.5	17.3205	2350.86	11.2216	32.9395
20-TWC-12-80	LASS		0.0835181		2.82266	0.237787	0.154994	0.147971	0.274339		7.53281	0.239696	0.354606	0.237291	0.805535		2181.04	4.27454	1954.98	7.85938	2401	4.93098	18.5763
20-TWC-12-81	LASS		0.0414796		4.35026	0.415162	0.153874	0.395563	-0.133667		4.86129	0.617738	0.230092	0.419625	0.771269		1797.91	10.0818	1333.82	9.80412	2388.66	13.1985	44.1601
20-TWC-12-86	LASS		0.018804		8.26858	0.642767	0.109329	0.233213	-0.0332091		1.83836	0.707965	0.120881	0.607616	0.956503		1053.5	8.87923	735.971	8.76207	1787.45	8.3288	58.8256
20-TWC-12-87	LASS		0.0289548		9.51501	0.494436	0.13484	0.430698	0.233164		1.96095	0.584045	0.105309	0.49168	0.683458		1099.5	7.56856	644.211	5.9411	2161.16	14.7243	70.1914
20-TWC-12-89	LASS		0.0284234		5.09121	0.415895	0.14866	0.174111	0.269262		4.00716	0.392446	0.196958	0.420164	0.913814		1639.1	6.4609	1156.04	8.62673	2329.8	5.84515	50.3802
20-TWC-12-94	LASS		0.04475		6.25462	0.345703	0.113006	0.299838	0.232909		2.73567	0.400593	0.160025	0.344455	0.642721		1269.14	5.69956	956.119	6.02081	1847.49	10.6298	48.2478
20-TWC-12-95	LASS		0.0488782		6.30383	0.490031	0.144665	0.218984	-0.243974		3.64679	0.584119	0.159575	0.487051	0.93346		1448.11	8.82239	949.179	8.47694	2283.02	7.38804	58.4245
20-TWC-15 leucogneiss Ruby Range
2.7-Ga group
20-TWC-15-11	SS		0.0146691		2.17298	0.674047	0.192852	0.442741	0.529942		12.3329	0.57719	0.461464	0.668095	0.764904		2622.32	10.63	2440.43	26.84	2765.9	14.24	11.7672
20-TWC-15-18	SS		0.715133		1.82336	0.311656	0.192793	0.258697	0.399537		14.6922	0.313731	0.549354	0.309781	0.643561		2787.72	5.88	2818.67	13.95	2765.4	8.32	-1.9263
20-TWC-15-41	SS		0.809359		1.87495	0.278658	0.192535	0.205015	0.355283		14.0217	0.280772	0.534521	0.276246	0.709882		2759.96	5.23	2755.54	12.25	2763.2	6.6	0.277215
20-TWC-15-42	SS		0.631509		1.92713	0.404175	0.192968	0.299254	0.369145		13.6334	0.390098	0.520215	0.40226	0.71438		2736.08	7.51	2694.54	17.45	2766.88	9.62	2.6145
20-TWC-15-43	SS		0.650397		2.61409	0.900251	0.193433	0.373697	0.205264		10.1279	0.916077	0.385207	0.918742	0.914885		2452.9	16.33	2088.15	31.47	2770.83	12.01	24.6381
20-TWC-15-85	LASS		0.784447		1.94286	0.219488	0.19281	0.20386	0.310668		8.20805	0.257159	0.515353	0.222473	0.631512		2727.62	4.62	2676.69	9.42	2765.54	6.56	3.21275
20-TWC-15-105	LASS		0.319538		2.09797	0.469924	0.19211	0.436441	-0.020241		11.7829	0.653156	0.478657	0.468082	0.731417		2651.71	11.94	2512.66	19.17	2759.57	14.05	8.94741
20-TWC-15-118	LASS		0.631555		2.16995	0.659472	0.193713	0.273296	0.305032		12.1742	0.630505	0.465087	0.635621	0.905693		2627.81	11.64	2443.26	26.29	2773.21	8.78	11.8978
20-TWC-15-152	LASS		0.754991		1.87956	0.557778	0.193014	0.368723	0.160309		13.917	0.621895	0.534223	0.542909	0.775632		2759.99	11.48	2750.04	24.47	2767.28	11.86	0.622994
20-TWC-15-154	LASS		0.349394		2.09718	0.496165	0.192518	0.408419	-0.0483918		12.3932	0.642495	0.478648	0.495245	0.78568		2654.05	12.13	2513.44	20.24	2763.05	13.14	9.03386
20-TWC-15-155	LASS		0.635795		1.91838	0.496979	0.192606	0.34104	0.0391568		13.5395	0.588638	0.524873	0.515835	0.815373		2738.61	10.98	2704.57	21.52	2763.81	10.97	2.14342
20-TWC-15-156	LASS		0.604522		1.82468	0.379058	0.193456	0.305671	0.0456314		14.3179	0.457471	0.549977	0.380124	0.776695		2790.3	8.87	2817.02	16.96	2771.03	9.83	-1.65967
20-TWC-15-157	LASS		0.573115		1.91097	0.53774	0.19258	0.218415	0.353047		13.7239	0.494022	0.529035	0.511774	0.90905		2742.15	9.36	2713.14	23.34	2763.58	7.03	1.82517
20-TWC-15-161	LASS		0.670641		1.77381	0.290175	0.191208	0.230809	0.207194		15.0174	0.327426	0.565157	0.290038	0.729079		2806.06	6.18	2882.14	13.22	2751.84	7.43	-4.73501
																			Weighted mean date (Ma)		2764	15	(95% conf.)
																			MSWD (n = 14)		1.5
2.4-Ga group
20-TWC-15-2	SS		0.244175		2.26114	0.591464	0.162252	0.464331	0.12707		9.85942	0.7079	0.444312	0.586495	0.761438		2424.52	12.72	2360.72	22.92	2478.5	15.35	4.75207
20-TWC-15-47	SS		0.0309857		2.20923	0.394941	0.161368	0.29709	0.315159		10.1957	0.414127	0.452536	0.392667	0.735462		2440.91	7.47	2407	15.55	2469.29	9.83	2.52259
20-TWC-15-61	LASS		0.0201872		2.08682	0.228261	0.160192	0.183523	0.14269		12.7311	0.294599	0.47961	0.227929	0.740525		2486.91	4.94	2523.77	9.34	2456.93	6.08	-2.72047
20-TWC-15-86	LASS		0.0236069		2.48286	0.355612	0.160969	0.171652	0.063893		5.59259	0.392779	0.404026	0.3385	0.883266		2331.39	6.89	2181.74	12.9	2465.1	5.68	11.4949
20-TWC-15-97	LASS		0.0243458		2.13273	0.177718	0.161127	0.234139	-0.0617812		10.4837	0.270429	0.469065	0.177747	0.671792		2472.13	5.49	2478.66	7.17	2466.76	7.75	-0.482414
20-TWC-15-119	LASS		0.0280194		2.15073	0.167731	0.160597	0.161056	0.25824		10.0699	0.198039	0.465349	0.165419	0.636167		2461.3	3.63	2461.41	6.73	2461.2	5.33	-0.00853242
20-TWC-15-129	LASS		0.0487367		2.17306	0.303846	0.161695	0.197668	0.0905591		10.5267	0.345656	0.461481	0.303612	0.814216		2458.04	6.29	2440.36	12.1	2472.7	6.54	1.30788
20-TWC-15-139	LASS		0.0614384		2.75314	0.697026	0.16067	0.230254	0.352992		7.8079	0.645159	0.36778	0.693404	0.940207		2235.86	11.55	1997.43	23.46	2461.97	7.63	18.8686
20-TWC-15-142	LASS		0.0274077		2.20834	0.413216	0.160907	0.203236	0.0733446		9.74766	0.425893	0.454955	0.389814	0.863196		2438.64	8.09	2407.81	16.27	2464.45	6.73	2.29828
20-TWC-15-143	LASS		0.0260698		2.20291	0.305585	0.161507	0.152412	0.141677		9.8367	0.319382	0.455184	0.297728	0.87351		2444.35	5.82	2412.77	12.05	2470.74	5.04	2.34626
20-TWC-15-148	LASS		0.0245693		2.10184	0.426182	0.160966	0.235909	0.108547		10.4762	0.441285	0.476666	0.411347	0.871743		2484.72	8.44	2508.83	17.36	2465.07	7.81	-1.7752
20-TWC-15-158	LASS		0.0243951		2.14184	0.281215	0.160725	0.191278	0.213229		10.456	0.288547	0.467551	0.277995	0.832793		2465.86	5.53	2469.9	11.31	2462.54	6.33	-0.298878
20-TWC-15-159	LASS		0.0229632		2.13503	0.290087	0.160953	0.223245	0.24631		10.5251	0.279624	0.469126	0.281499	0.736895		2470.13	5.8	2476.44	11.69	2464.94	7.39	-0.466543
20-TWC-15-160	LASS		0.0188662		2.13655	0.337402	0.160905	0.150273	0.26634		10.5237	0.311468	0.469713	0.326686	0.892941		2469.19	6	2474.98	13.59	2464.43	4.98	-0.428091
																			Weighted mean date (Ma)		2465	13	(95% conf.)
																			MSWD (n = 14)		1.9
mixing
20-TWC-15-3	SS		0.0663721		2.27471	0.798735	0.181137	0.400118	0.209498		10.9554	0.854125	0.441277	0.792395	0.880656		2520.98	14.86	2348.92	30.82	2662.56	12.99	11.7796
20-TWC-15-4	SS		0.0632138		2.32051	0.525602	0.172635	0.504432	0.545608		10.2078	0.512148	0.431757	0.54223	0.49467		2457.87	8.91	2309.95	20	2582.6	16.51	10.5572
20-TWC-15-8	SS		0.0206431		6.94464	1.37817	0.167905	0.508897	0.0342291		3.40295	1.50879	0.145809	1.41933	0.933624		1488.61	22.24	867.22	21.92	2536.11	16.73	65.8051
20-TWC-15-9	SS		0.509681		2.01675	0.378772	0.189974	0.299207	0.375351		13.1391	0.381837	0.496889	0.372848	0.671543		2678.36	7.11	2595.92	15.86	2741.2	9.65	5.29987
20-TWC-15-10	SS		0.487843		1.96232	0.292475	0.186897	0.206647	0.24956		13.2578	0.312002	0.510861	0.291765	0.762176		2688.76	5.79	2654.92	12.47	2714.31	6.68	2.18803
20-TWC-15-12	SS		0.0147139		2.24324	0.553268	0.188833	0.466058	0.00291314		11.711	0.711277	0.446722	0.550836	0.761913		2572.78	13.24	2376.48	21.55	2731.28	15.04	12.9902
20-TWC-15-13	SS		0.018697		2.02165	0.71853	0.175087	0.276133	0.0160574		12.0556	0.753737	0.497988	0.690341	0.92627		2599.38	14.06	2590.75	30.04	2606.12	9.02	0.589766
20-TWC-15-15	SS		0.0251366		2.11346	0.638873	0.178987	0.253912	0.48764		11.7963	0.555406	0.477073	0.621246	0.909336		2578.43	10.28	2497.39	25.93	2642.76	8.26	5.50069
20-TWC-15-20	SS		0.283727		1.92356	0.467826	0.187071	0.318799	0.300305		13.4945	0.481988	0.519852	0.472351	0.79916		2708.48	8.9	2698.62	20.22	2715.83	10.3	0.633692
20-TWC-15-22	SS		0.230355		2.02448	0.473444	0.175652	0.372324	0.184386		12.0784	0.552262	0.494793	0.478242	0.758981		2601.09	10.02	2587.76	19.78	2611.49	12.15	0.908677
20-TWC-15-23	SS		0.121855		4.64325	1.57623	0.184527	0.483434	-0.446522		5.6704	1.97811	0.220067	1.69515	0.975517		1897	31.02	1257.34	35.29	2693.24	15.65	53.315
20-TWC-15-24	SS		0.466536		2.34338	0.657527	0.186904	0.351479	0.292672		11.1316	0.636832	0.429149	0.676975	0.852495		2522.46	11.83	2290.97	24.85	2714.37	11.36	15.5985
20-TWC-15-25	SS		0.543619		1.88916	0.412789	0.190266	0.282235	0.51687		14.0415	0.354931	0.531783	0.418911	0.732578		2741.57	6.68	2738.65	18.05	2743.73	9.1	0.185149
20-TWC-15-26	SS		0.0166981		2.5245	0.465196	0.168045	0.31012	0.0137378		9.15557	0.552943	0.397078	0.465215	0.834815		2355.51	9.97	2151.14	16.68	2537.51	10.19	15.2263
20-TWC-15-27	SS		0.100096		3.86696	0.891195	0.172234	0.417667	-0.148667		6.13585	1.01005	0.260816	0.864204	0.911148		1995.73	17.78	1482.68	23.14	2578.72	13.67	42.5033
20-TWC-15-30	SS		0.0513888		2.51614	0.5558	0.180688	0.535614	-0.201631		9.81792	0.849756	0.398311	0.566975	0.785871		2425.22	15.29	2157.21	19.97	2658.45	17.4	18.8546
20-TWC-15-31	SS		0.687245		1.9112	0.443406	0.189147	0.22026	0.526936		13.5591	0.369708	0.525904	0.43555	0.859196		2725.01	6.99	2712.87	19.24	2734.02	7.11	0.773586
20-TWC-15-32	SS		0.576498		2.39981	0.787189	0.181977	0.370257	0.327546		10.3926	0.760925	0.419186	0.781038	0.886241		2475.56	13.66	2245.48	29.25	2670.22	12.02	15.9066
20-TWC-15-35	SS		0.429725		1.88557	0.445385	0.190004	0.359272	0.478004		13.8165	0.419884	0.530321	0.470694	0.696845		2742.07	7.75	2742.9	19.5	2741.46	11.58	-0.0525268
20-TWC-15-36	SS		0.00777302		2.17973	1.0999	0.173948	1.03266	0.677292		11.1517	1.34022	0.462551	1.11813	0.458254		2522.98	15.67	2434.13	43.7	2595.24	33.75	6.2079
20-TWC-15-38	SS		0.213684		2.54818	0.601109	0.177156	0.462903	-0.382925		9.61322	0.91052	0.394735	0.603596	0.878422		2395.39	16	2134.12	21.4	2625.68	15.09	18.7212
20-TWC-15-39	SS		0.52784		1.99265	0.272176	0.187848	0.229495	0.305577		12.894	0.303433	0.502468	0.277411	0.691327		2679.09	5.5	2621.72	11.49	2722.67	7.41	3.70776
20-TWC-15-44	SS		0.0115706		1.8954	0.353227	0.180046	0.253295	0.410424		12.9669	0.343066	0.528134	0.344092	0.739773		2686.27	6.28	2731.3	15.41	2652.55	8.23	-2.96884
20-TWC-15-45	SS		0.0829655		4.30119	0.670432	0.166849	0.513064	0.60378		5.31346	0.539063	0.233077	0.66742	0.659648		1876.27	9.14	1347.56	15.98	2525.52	16.88	46.6423
20-TWC-15-46	SS		0.470495		1.85227	0.453097	0.189981	0.414383	0.1784		14.278	0.536071	0.540378	0.469125	0.662767		2758.84	10.35	2782.94	20.07	2741.26	13.36	-1.52047
20-TWC-15-48	SS		0.228609		2.4991	0.419134	0.174031	0.349896	0.356301		9.68022	0.462651	0.400839	0.42301	0.706568		2396.92	7.93	2169.7	15.13	2596.05	11.44	16.423
20-TWC-15-49	SS		0.291519		1.91614	0.251971	0.18703	0.269161	0.150195		13.5743	0.344475	0.522383	0.251982	0.622027		2711.92	6.3	2707.16	10.92	2715.48	8.7	0.306392
20-TWC-15-50	SS		0.0472098		2.01508	0.574913	0.1767	0.304309	0.381274		12.1826	0.546666	0.497388	0.56475	0.826141		2611.03	9.89	2597.7	24.09	2621.39	9.92	0.903719
20-TWC-15-51	SS		0.011867		2.0348	0.531504	0.179949	0.329326	-0.0403791		12.2499	0.643462	0.491949	0.540581	0.857533		2618.99	11.71	2576.94	22.13	2651.65	10.71	2.81749
20-TWC-15-52	SS		0.179445		2.09234	0.533702	0.183521	0.380421	0.201717		12.1193	0.581896	0.478996	0.526494	0.771427		2611.27	10.84	2518.26	21.81	2684.2	12.33	6.1821
20-TWC-15-53	SS		0.28657		2.32336	0.584602	0.189217	0.365276	0.220333		11.2284	0.608511	0.431938	0.5774	0.811374		2541.92	11.28	2307.57	22.23	2734.63	11.78	15.6167
20-TWC-15-54	SS		0.0108486		4.33554	1.18532	0.178883	0.391032	0.386681		5.72257	1.10072	0.233021	1.18054	0.941986		1929.29	18.54	1337.91	28.07	2641.79	12.72	49.3559
20-TWC-15-56	SS		0.02256		2.04831	0.481867	0.17017	0.425224	0.808395		11.4453	0.509798	0.488813	0.477345	0.391321		2560.48	5.23	2562.91	19.97	2558.56	13.95	-0.170018
20-TWC-15-58	SS		0.398794		1.8704	1.09674	0.190555	0.345407	0.174301		14.1185	1.10873	0.539466	1.10608	0.950831		2752.46	20.27	2760.99	48.28	2746.22	11.13	-0.53783
20-TWC-15-62	LASS		0.0112414		1.93325	0.143483	0.177242	0.126212	0.25661		15.4903	0.172489	0.517568	0.144665	0.715188		2652.85	3.04	2687.56	6.18	2626.49	4.11	-2.32516
20-TWC-15-64	LASS		0.0333989		2.16814	0.191487	0.177978	0.289716	-0.0629833		13.8899	0.352522	0.461388	0.194336	0.595971		2549.29	6.53	2444.97	7.64	2633.37	9.43	7.15433
20-TWC-15-66	LASS		0.0155306		2.06718	0.22605	0.167503	0.307636	-0.549881		12.9035	0.44707	0.484276	0.224206	0.845868		2537.2	8.61	2543.58	9.31	2532.09	10.12	-0.453775
20-TWC-15-67	LASS		0.00742788		1.93428	0.268381	0.180502	0.180739	0.287433		13.7664	0.267628	0.517188	0.263239	0.780657		2669.51	5.12	2686.39	11.56	2656.74	5.87	-1.11603
20-TWC-15-68	LASS		0.0330772		3.26553	0.364052	0.173023	0.181284	0.442273		5.78926	0.328921	0.306757	0.360518	0.871678		2149.08	5.73	1722.13	10.78	2586.35	5.93	33.4147
20-TWC-15-69	LASS		1.02346		1.93902	0.313706	0.189729	0.30745	0.239063		10.6934	0.367749	0.516764	0.316163	0.614386		2714.25	7.1	2681.02	13.49	2739.08	9.91	2.11969
20-TWC-15-70	LASS		1.13736		1.7982	0.150572	0.190082	0.147206	0.240618		11.6457	0.184866	0.556498	0.151097	0.647463		2787.46	3.42	2850.53	6.8	2742.13	4.75	-3.95313
20-TWC-15-71	LASS		0.0532956		1.96722	0.253714	0.177243	0.344963	-0.381391		10.1249	0.532544	0.50904	0.248882	0.778892		2636.48	9.21	2649.51	10.8	2626.5	11.24	-0.876071
20-TWC-15-74	LASS		0.155397		2.86608	0.663328	0.174611	0.383987	-0.235838		7.52466	0.951334	0.350964	0.716558	0.915862		2274.78	14.96	1929.38	21.68	2601.59	12.54	25.8384
20-TWC-15-77	LASS		0.0356872		3.36762	1.07553	0.166518	0.375412	-0.797251		7.00969	1.35058	0.308959	1.02807	0.983811		2087.63	24.18	1676.15	31.11	2522.19	12.36	33.5439
20-TWC-15-78	LASS		0.149365		2.53573	0.201197	0.180259	0.194954	0.198331		7.75908	0.237066	0.394571	0.20105	0.708663		2415.88	4.53	2143.04	7.19	2654.51	6.34	19.268
20-TWC-15-79	LASS		0.111181		2.29907	0.31654	0.169041	0.224965	-0.202799		7.43083	0.442906	0.436063	0.312968	0.865698		2447	7.68	2328.03	12.12	2547.41	7.39	8.61188
20-TWC-15-80	LASS		0.134952		2.50851	0.39718	0.180403	0.3269	0.564527		6.77161	0.343828	0.400214	0.401144	0.53351		2426.57	6.21	2162.79	14.3	2655.83	10.62	18.5644
20-TWC-15-82	LASS		0.214377		2.19011	0.307381	0.185183	0.170029	0.284012		7.16906	0.299926	0.457432	0.305447	0.83152		2576.94	5.61	2424.52	12.17	2699.11	5.5	10.1734
20-TWC-15-83	LASS		0.0750564		3.68793	2.66767	0.181799	0.332228	-0.780432		4.83075	1.75802	0.318558	1.62453	0.991617		2084.92	50.9	1546.66	71.9	2668.61	10.78	42.0425
20-TWC-15-84	LASS		0.625214		1.98219	0.26172	0.188999	0.194468	0.222075		7.79238	0.294415	0.50565	0.259545	0.760598		2689.81	5.35	2633.07	11.09	2732.73	6.27	3.6469
20-TWC-15-87	LASS		0.0267235		3.19727	0.839813	0.162695	0.326406	-0.125181		4.89563	0.868003	0.318799	0.835321	0.877786		2113.07	16.34	1754.31	25.28	2483.1	10.79	29.35
20-TWC-15-89	LASS		0.0622573		2.23004	0.351388	0.170013	0.31299	0.00085046		21.2608	0.472868	0.449899	0.350492	0.769457		2480.53	8.55	2388.23	13.74	2557.02	10.27	6.60104
20-TWC-15-90	LASS		0.0468549		2.51718	0.496336	0.173492	0.301365	0.327512		18.2131	0.474699	0.399886	0.491623	0.858447		2387.44	8.81	2156.46	17.83	2590.87	9.85	16.767
20-TWC-15-91	LASS		0.815227		1.92154	0.190029	0.18803	0.210151	0.208854		23.6875	0.262622	0.520978	0.19011	0.568894		2714.3	4.67	2700.95	8.22	2724.26	6.79	0.855645
20-TWC-15-92	LASS		0.748462		2.31173	0.521715	0.189114	0.533854	0.258798		17.0848	0.638718	0.433266	0.517685	0.586842		2546.09	11.75	2317.32	19.9	2733.73	17.22	15.2323
20-TWC-15-93	LASS		0.263576		1.82865	0.291557	0.184321	0.303752	0.242349		19.0844	0.339572	0.547595	0.289035	0.691794		2742.34	6.8	2812.07	13.02	2691.4	9.84	-4.48354
20-TWC-15-94	LASS		0.267079		2.77518	0.322003	0.168571	0.262075	0.235079		10.6107	0.34951	0.360353	0.333317	0.730682		2272.08	6.48	1983.77	10.78	2542.75	8.61	21.9833
20-TWC-15-96	LASS		0.0157042		2.08773	0.246085	0.164616	0.300635	-0.449625		11.4242	0.433284	0.479829	0.246673	0.82252		2511.8	8.5	2522.86	10.07	2502.88	9.92	-0.79828
20-TWC-15-99	LASS		1.50206		1.96624	0.184271	0.191302	0.162922	0.463299		13.1284	0.185988	0.509138	0.183397	0.617316		2708.87	3.35	2650.58	7.85	2752.65	5.25	3.70806
20-TWC-15-100	LASS		0.580575		1.96399	0.220866	0.190885	0.241346	0.322753		12.9368	0.264616	0.50984	0.224227	0.567697		2707.9	4.99	2653.08	9.41	2749.06	7.77	3.49138
20-TWC-15-101	LASS		0.830021		2.05062	0.265606	0.187772	0.220107	0.341496		12.0182	0.276861	0.488502	0.26943	0.662503		2651.7	5.19	2560.53	11	2722.01	7.11	5.93238
20-TWC-15-102	LASS		0.0376984		2.22005	0.28599	0.171921	0.218662	0.474248		10.0295	0.263531	0.451045	0.286339	0.716701		2495.05	4.82	2397.21	11.22	2575.68	7.16	6.92904
20-TWC-15-103	LASS		0.0259713		2.14252	0.577608	0.170259	0.234222	-0.612559		10.3002	0.663679	0.470077	0.524962	0.962555		2519.06	13.58	2469.25	23.22	2559.44	7.68	3.52382
20-TWC-15-104	LASS		0.0417837		2.23509	0.322368	0.162255	0.259909	0.579365		9.28248	0.284563	0.44788	0.31077	0.573996		2435.23	4.93	2383.73	12.59	2478.54	8.59	3.82524
20-TWC-15-106	LASS		0.0461735		4.47267	0.497802	0.164144	0.281798	-0.438206		4.74676	0.673912	0.224438	0.506679	0.927636		1829.06	11.15	1300.76	11.49	2498.04	9.3	47.9288
20-TWC-15-108	LASS		0.0161602		2.10403	0.555252	0.180576	0.222715	0.499143		12.8159	0.467494	0.477388	0.542509	0.898838		2590.89	8.89	2506.66	22.6	2657.42	7.24	5.67317
20-TWC-15-109	LASS		0.101883		2.44326	0.376022	0.177763	0.17876	0.0765769		10.9132	0.399062	0.410885	0.372884	0.881638		2437.28	7.31	2211.67	13.8	2631.36	5.82	15.9495
20-TWC-15-110	LASS		0.479011		2.01643	0.398738	0.182121	0.316033	0.324546		13.4498	0.415458	0.497124	0.406077	0.710251		2638.77	7.75	2596.27	16.7	2671.54	10.25	2.81748
20-TWC-15-111	LASS		0.0142566		2.18418	0.270375	0.166501	0.237807	0.0207739		11.278	0.366305	0.458752	0.267232	0.773767		2480.44	6.48	2430	10.73	2522.02	7.83	3.64866
20-TWC-15-112	LASS		0.0168536		3.30823	0.848943	0.168305	0.236842	0.435056		7.63734	0.747552	0.311146	0.838947	0.951534		2112.88	13.51	1702.59	24.9	2540.11	7.78	32.9718
20-TWC-15-114	LASS		0.34794		2.11924	0.510183	0.182705	0.194174	-0.024651		12.4643	0.535953	0.47664	0.485511	0.930918		2595.12	10.1	2491.74	20.67	2676.83	6.3	6.91452
20-TWC-15-115	LASS		0.747183		2.76908	0.372664	0.170441	0.342485	0.510901		8.68445	0.363152	0.361274	0.390451	0.587396		2284.09	6.31	1987.53	12.49	2561.22	11.23	22.3991
20-TWC-15-117	LASS		0.395406		3.29892	0.671889	0.169865	0.269383	0.45798		7.17029	0.611502	0.304676	0.701469	0.912862		2123.59	10.44	1706.81	19.75	2555.56	8.84	33.2119
20-TWC-15-120	LASS		0.028597		2.10933	0.250112	0.162123	0.196457	0.0505315		10.3517	0.307471	0.474432	0.250128	0.806949		2488.07	5.64	2501.45	10.16	2477.16	6.5	-0.980558
20-TWC-15-121	LASS		0.114743		2.41202	0.462645	0.170049	0.236871	-0.333682		9.55091	0.57269	0.416122	0.45231	0.917832		2408.25	10.57	2235.88	17.13	2557.37	7.77	12.5711
20-TWC-15-123	LASS		0.563438		2.37065	0.631754	0.190839	0.34254	0.0343409		10.9282	0.706256	0.423566	0.597725	0.832821		2531.09	12.93	2268.76	23.68	2748.66	11.03	17.4594
20-TWC-15-124	LASS		0.10076		1.98752	0.838348	0.173324	0.335167	0.0893546		11.8569	0.83581	0.505066	0.769246	0.92929		2605.86	16.07	2627.28	35.46	2589.25	10.96	-1.46877
20-TWC-15-125	LASS		0.512488		1.93221	0.350669	0.189089	0.275705	0.121367		13.3699	0.41593	0.518814	0.34849	0.759284		2714.38	7.76	2688.75	15.11	2733.51	8.89	1.63746
20-TWC-15-126	LASS		0.572228		1.96082	0.784706	0.191515	0.719585	0.414573		13.3944	0.730652	0.512784	0.791858	0.610725		2712.54	15.11	2656.59	33.49	2754.48	23.17	3.55385
20-TWC-15-127	LASS		0.686401		1.88147	0.30387	0.188078	0.257922	-0.15917		13.7889	0.397567	0.532883	0.303917	0.806568		2734.49	7.95	2747.77	13.32	2724.69	8.33	-0.847069
20-TWC-15-128	LASS		0.638549		2.19227	0.855186	0.180125	0.502342	0.0187187		11.6738	1.02511	0.458375	0.880078	0.868234		2550.16	17.99	2422.53	33.85	2653.28	16.33	8.69678
20-TWC-15-130	LASS		0.320178		2.13895	0.456831	0.188702	0.26524	0.232833		12.5538	0.444183	0.468953	0.444719	0.825891		2616.72	8.68	2472.67	18.39	2730.14	8.56	9.43065
20-TWC-15-131	LASS		0.534748		2.06162	0.483568	0.188883	0.221505	0.181809		13.1428	0.47264	0.487004	0.457575	0.882876		2652.21	9.11	2549.25	19.96	2731.72	7.15	6.67967
20-TWC-15-133	LASS		0.386138		1.97146	0.445392	0.185926	0.266163	0.164324		13.5248	0.507253	0.507212	0.476091	0.863705		2679.47	8.87	2644.83	18.94	2705.72	8.61	2.25042
20-TWC-15-136	LASS		0.331069		1.92681	1.30334	0.185591	0.373124	-0.042483		14.1829	1.30585	0.534669	1.24532	0.960041		2699.38	25.37	2694.91	56.26	2702.74	12.07	0.289706
20-TWC-15-137	LASS		0.6626		1.81457	0.266242	0.188964	0.206585	0.398894		14.7837	0.261423	0.552335	0.268838	0.677057		2773.26	4.91	2829.73	11.95	2732.42	6.67	-3.56131
20-TWC-15-138	LASS		0.158331		2.0423	0.194607	0.182934	0.147229	0.171705		11.9003	0.221425	0.489905	0.198606	0.757332		2630.98	4.1	2569.13	8.08	2678.9	4.77	4.09758
20-TWC-15-140	LASS		0.478096		2.07422	0.66093	0.189819	0.387427	-0.0524511		12.2595	0.752854	0.4852	0.652786	0.86197		2651.13	14.45	2536.45	27.16	2739.86	12.49	7.4241
20-TWC-15-141	LASS		0.0271712		1.97829	0.500152	0.179948	0.281632	0.400174		12.0537	0.501424	0.506731	0.473402	0.842452		2645.44	8.58	2637.33	21.22	2651.64	9.16	0.539666
20-TWC-15-145	LASS		0.0205006		2.14329	0.40369	0.165679	0.259995	0.548937		10.4657	0.331062	0.468822	0.383474	0.761287		2493.38	6.18	2468.51	16.23	2513.7	8.57	1.79775
20-TWC-15-146	LASS		0.199707		3.13107	0.317427	0.174734	0.214461	-0.00378981		7.61138	0.392034	0.32063	0.321044	0.825015		2195.56	6.76	1786.7	9.71	2602.76	7	31.3536
20-TWC-15-147	LASS		0.165374		2.25786	0.420464	0.182007	0.316705	0.38227		11.0501	0.42092	0.444489	0.406968	0.750438		2532.36	7.64	2363.6	16.31	2670.5	10.28	11.4922
20-TWC-15-151	LASS		0.0246406		2.08197	0.582019	0.172645	0.366396	0.578139		11.2058	0.472819	0.482362	0.57121	0.768732		2558.75	8.71	2528.63	23.86	2582.7	11.99	2.09355
20-TWC-15-153	LASS		0.25991		1.99645	0.409144	0.183642	0.239607	0.0582173		12.3806	0.454431	0.502912	0.393131	0.827363		2655.96	8.52	2617.61	17.25	2685.29	7.76	2.5204
20-TWC-15-163	LASS		0.464257		1.89861	0.339267	0.189192	0.275827	0.079949		13.8385	0.435746	0.528069	0.332225	0.760586		2731.49	7.79	2727.54	14.79	2734.41	8.9	0.251242
20-TWC-15-164	LASS		0.0271956		2.29076	0.336134	0.171476	0.183435	0.418182		10.372	0.300493	0.43847	0.337802	0.817729		2463.58	5.59	2335.12	12.91	2571.35	6.01	9.187
20-TWC-15-165	LASS		0.850851		1.82262	0.39509	0.186958	0.303396	0.258567		14.1755	0.41126	0.550439	0.389805	0.720841		2758.93	8.02	2819.6	17.69	2714.84	9.8	-3.85879
20-TWC-15-166	LASS		0.381624		1.8198	0.348478	0.18696	0.264366	0.0133988		14.1894	0.427993	0.551729	0.344272	0.783445		2760.41	8.08	2823.14	15.61	2714.86	8.54	-3.98842
20-TWC-15-167	LASS		0.701428		2.17375	0.336797	0.19086	0.314267	0.24889		12.1295	0.418532	0.460888	0.339483	0.625299		2612.24	7.34	2439.71	13.41	2748.84	10.12	11.2458
20-TWC-10 amphibolite Greenhorn Range
1.7-Ga group
20-TWC-10-1	SS		0.0847299		3.30333	0.355724	0.107815	0.347657	0.3197		4.50218	0.406692	0.303779	0.353393	0.522568		1730.63	6.68	1704.81	10.44	1761.99	12.46	3.24519
20-TWC-10-2	SS		0.0260142		3.15332	0.338597	0.1079	0.299427	0.26205		4.71568	0.381707	0.31784	0.338468	0.691303		1770.06	6.38	1775.68	10.3	1763.43	10.73	-0.694669
20-TWC-10-3	SS		0.0271297		3.23084	0.306885	0.108555	0.278521	0.516461		4.57406	0.324182	0.310275	0.292404	0.618028		1754.81	4.73	1738.33	9.16	1774.48	9.96	2.03722
20-TWC-10-5	SS		0.16287		3.23664	0.279032	0.107611	0.31606	0.301724		4.53387	0.378881	0.309629	0.278197	0.57164		1746.03	5.76	1735.6	8.32	1758.54	11.33	1.30449
20-TWC-10-6	SS		0.0176221		3.18448	0.275446	0.108785	0.259681	0.386273		4.64616	0.298113	0.314676	0.267714	0.572582		1768.66	4.87	1760.47	8.32	1778.35	9.28	1.00543
20-TWC-10-7	SS		0.0618773		3.20936	0.303988	0.10767	0.294814	0.272704		4.56044	0.355861	0.311697	0.287713	0.595822		1753.54	5.91	1748.52	9.12	1759.53	10.57	0.625735
20-TWC-10-8	SS		0.065357		3.17856	0.314073	0.107824	0.302404	0.262823		4.62629	0.361902	0.31549	0.306603	0.65984		1762.79	6.14	1763.34	9.5	1762.14	10.83	-0.068099
20-TWC-10-9	SS		0.0695489		3.14072	0.273717	0.107562	0.273059	0.183613		4.66141	0.33276	0.319024	0.267214	0.659109		1770.79	5.74	1781.9	8.35	1757.7	9.79	-1.3768
20-TWC-10-10	SS		0.132301		3.17114	0.313205	0.108324	0.314799	0.279465		4.66213	0.390685	0.315815	0.317593	0.629674		1768.62	6.19	1766.95	9.49	1770.6	11.27	0.206145
20-TWC-10-11	SS		0.12652		3.131	0.437132	0.108273	0.389785	0.423748		4.70871	0.459661	0.31979	0.444655	0.613177		1778.91	7.33	1786.73	13.37	1769.74	13.95	-0.960028
20-TWC-10-12	SS		0.0157209		3.14976	0.280701	0.108005	0.252803	0.377416		4.68279	0.311098	0.317917	0.280949	0.654263		1771.82	4.9	1777.43	8.55	1765.22	9.05	-0.691698
20-TWC-10-13	SS		0.0321073		3.22911	0.247137	0.107959	0.243566	0.272414		4.60715	0.288315	0.31018	0.24524	0.657154		1750.66	4.84	1739.15	7.38	1764.44	8.72	1.43332
20-TWC-10-15	SS		0.247331		3.26215	0.240657	0.108336	0.280954	0.337341		4.5806	0.300556	0.307134	0.244062	0.506473		1745.08	4.93	1723.69	7.13	1770.81	10.05	2.66093
20-TWC-10-16	SS		0.264473		3.29354	0.24366	0.107971	0.326056	0.288159		4.5223	0.344315	0.304235	0.245093	0.475174		1734.29	5.64	1709.26	7.17	1764.63	11.68	3.13777
20-TWC-10-17	SS		0.0189247		3.29058	0.243045	0.108164	0.237316	0.27834		4.5273	0.295422	0.304387	0.242294	0.64686		1736.53	4.7	1710.61	7.16	1767.91	8.5	3.24112
20-TWC-10-18	SS		0.0189208		3.25626	0.260823	0.108316	0.259224	0.384004		4.58673	0.302088	0.307404	0.257843	0.601706		1746.43	4.72	1726.42	7.74	1770.47	9.28	2.48804
20-TWC-10-19	SS		0.0131553		3.22872	0.231452	0.108501	0.241233	0.242266		4.62471	0.290338	0.309918	0.246165	0.65834		1754.94	4.76	1739.33	6.92	1773.57	8.63	1.93057
20-TWC-10-20	SS		0.249192		3.21069	0.240556	0.107906	0.281012	0.224648		4.61427	0.330944	0.311704	0.244035	0.585773		1755.02	5.34	1747.88	7.22	1763.54	10.07	0.887987
20-TWC-10-21	SS		0.0182611		3.22996	0.239968	0.107855	0.275997	0.284105		4.58332	0.295359	0.310183	0.234114	0.583954		1749.63	5.07	1738.74	7.17	1762.66	9.89	1.35704
20-TWC-10-22	SS		0.0134332		3.25526	0.283339	0.10824	0.233498	0.322318		4.56093	0.306765	0.308198	0.282995	0.707731		1746.1	4.96	1726.89	8.41	1769.18	8.36	2.39037
20-TWC-10-23	SS		0.0257969		3.20578	0.318889	0.108332	0.316152	0.356243		4.58749	0.368133	0.312711	0.318129	0.637019		1759.59	5.9	1750.23	9.58	1770.73	11.31	1.15771
20-TWC-10-24	SS		0.110536		3.16716	0.324475	0.107537	0.319703	0.235392		4.61228	0.414631	0.31595	0.328892	0.714554		1763.57	6.53	1768.89	9.84	1757.27	11.46	-0.661253
20-TWC-10-25	SS		0.0470217		3.17394	0.21752	0.107803	0.216638	0.182372		4.60556	0.290136	0.315322	0.214403	0.667442		1763.85	4.55	1765.59	6.58	1761.8	7.76	-0.215121
20-TWC-10-26	SS		0.0308305		3.1656	0.218036	0.108293	0.248808	0.205464		4.64296	0.292808	0.316394	0.217017	0.590657		1769.85	4.85	1769.66	6.61	1770.08	8.9	0.0237277
20-TWC-10-27	SS		0.0281427		3.19018	0.330421	0.108523	0.286012	0.443196		4.60962	0.336474	0.313584	0.313674	0.631404		1765.15	5.37	1757.72	9.96	1773.94	10.23	0.914349
20-TWC-10-29	SS		0.0633787		3.20839	0.2889	0.108049	0.273237	0.377267		4.57553	0.314537	0.312603	0.291159	0.623657		1756.73	5.14	1748.98	8.67	1765.96	9.78	0.961517
20-TWC-10-30	SS		0.00598686		3.18448	0.226602	0.108648	0.234308	0.334296		4.65158	0.27298	0.314557	0.223953	0.553502		1767.61	4.37	1760.48	6.84	1776.05	8.38	0.876665
20-TWC-10-31	SS		0.0428793		3.15911	0.26959	0.108363	0.240052	0.3037		4.68325	0.313979	0.317104	0.272411	0.636078		1772.11	4.96	1772.83	8.19	1771.26	8.59	-0.0886375
20-TWC-10-32	SS		0.0116149		3.16835	0.245402	0.108409	0.275497	0.216086		4.68907	0.322906	0.316133	0.242522	0.610717		1770.01	5.37	1768.31	7.44	1772.03	9.86	0.209929
20-TWC-10-33	SS		0.173799		3.19801	0.264754	0.108151	0.345145	0.277657		4.65981	0.370082	0.312947	0.273222	0.487624		1760.23	6.1	1753.95	7.97	1767.69	12.36	0.777286
20-TWC-10-34	SS		0.0199481		3.17465	0.258216	0.108134	0.263655	0.383284		4.69451	0.296306	0.315431	0.250398	0.553982		1766.23	4.76	1765.24	7.82	1767.39	9.44	0.121648
20-TWC-10-35	SS		0.199621		3.21674	0.264299	0.108537	0.333448	0.336811		4.64154	0.345731	0.31098	0.259661	0.448268		1758.32	5.71	1745	7.92	1774.18	11.93	1.6447
20-TWC-10-36	SS		0.0580771		3.27609	0.268806	0.10763	0.279337	0.182905		4.53085	0.340208	0.305745	0.268108	0.647185		1736.08	5.71	1717.25	7.94	1758.85	10.01	2.36518
20-TWC-10-37	SS		0.00993993		3.2075	0.280074	0.108376	0.273702	0.342771		4.64401	0.320884	0.312604	0.278796	0.643671		1759.49	5.2	1749.41	8.41	1771.48	9.79	1.24585
20-TWC-10-38	SS		0.0114864		3.22281	0.266945	0.108641	0.252718	0.325934		4.64386	0.296743	0.310825	0.275506	0.58174		1757.54	4.94	1742.13	7.99	1775.93	9.04	1.90323
20-TWC-10-39	SS		0.04328		3.2151	0.265869	0.107612	0.252427	0.280548		4.60558	0.318938	0.311506	0.257914	0.635621		1751.6	5.09	1745.79	7.97	1758.55	9.05	0.725598
20-TWC-10-40	SS		0.0181998		3.20633	0.266835	0.108294	0.238326	0.373092		4.63825	0.299794	0.312332	0.262773	0.671312		1759.16	4.65	1749.97	8.02	1770.09	8.53	1.13667
20-TWC-10-41	SS		0.098102		3.16803	0.228094	0.107547	0.246849	0.339018		4.66629	0.274686	0.316155	0.227862	0.544724		1763.42	4.48	1768.47	6.91	1757.45	8.85	-0.627045
20-TWC-10-42	SS		0.0170182		3.201	0.284848	0.108133	0.2549	0.269761		4.63532	0.316266	0.312902	0.284212	0.670987		1759.31	5.36	1752.52	8.57	1767.38	9.13	0.840793
20-TWC-10-43	SS		0.131715		3.23214	0.269593	0.107232	0.256205	0.299112		4.58982	0.298525	0.309869	0.264439	0.605564		1744.25	5.09	1737.72	8.05	1752.08	9.19	0.819597
20-TWC-10-44	SS		0.206971		3.22974	0.291401	0.108352	0.351065	0.0372392		4.64597	0.408132	0.310543	0.290727	0.203847		1753.53	7.33	1738.85	8.7	1771.07	12.56	1.81924
20-TWC-10-45	SS		0.0112631		3.25201	0.286241	0.10834	0.221174	0.326899		4.62142	0.305981	0.308252	0.284855	0.698947		1747.7	4.89	1728.4	8.51	1770.87	7.92	2.39826
20-TWC-10-46	SS		0.146032		3.24936	0.273374	0.108375	0.346233	0.392082		4.63172	0.354618	0.308389	0.27231	0.451561		1748.65	5.67	1729.64	8.13	1771.45	12.39	2.36021
20-TWC-10-47	SS		0.227935		3.2411	0.257342	0.107629	0.211651	0.377895		4.61599	0.264855	0.309244	0.257579	0.728673		1745.01	4.32	1733.5	7.67	1758.83	7.59	1.44016
20-TWC-10-48	SS		0.0094343		3.1984	0.213621	0.107751	0.205031	0.355642		4.68662	0.22799	0.313019	0.212656	0.59811		1757.02	3.89	1753.76	6.43	1760.9	7.35	0.405474
20-TWC-10-49	SS		0.0101824		3.16674	0.28729	0.108383	0.227209	0.269975		4.76853	0.314985	0.31668	0.288921	0.728537		1770.24	5.16	1769.1	8.71	1771.59	8.13	0.140552
20-TWC-10-50	SS		0.261718		3.14574	0.273505	0.108668	0.337173	0.359449		4.79688	0.358794	0.318462	0.271673	0.396626		1778.02	5.75	1779.42	8.34	1776.39	12.06	-0.170571
20-TWC-10-51	SS		0.181477		3.18575	0.261919	0.108309	0.334586	0.25956		4.70982	0.377062	0.314361	0.25961	0.50475		1764.66	6.03	1759.86	7.91	1770.35	11.97	0.592538
20-TWC-10-52	SS		0.195541		3.27281	0.496934	0.108515	0.453095	0.174813		4.589	0.575602	0.306612	0.485455	0.627244		1743.73	9.98	1718.76	14.69	1773.81	16.21	3.10349
20-TWC-10-53	LASS		0.00823223		3.21882	0.216244	0.107554	0.253975	0.540162		4.39499	0.300434	0.311056	0.215193	0.540162		1750.19	3.73	1744.02	6.48	1757.57	9.1	0.770951
20-TWC-10-54	LASS		0.0419931		3.08482	0.161217	0.107125	0.278791	0.309874		4.30831	0.27911	0.32451	0.161061	0.309874		1782.44	4.53	1810.05	4.99	1750.25	10	-3.41665
20-TWC-10-55	LASS		0.0454715		3.14412	0.208599	0.107772	0.280835	0.504233		4.01512	0.319418	0.318512	0.208969	0.504233		1771.51	4.13	1780.22	6.36	1761.26	10.06	-1.0765
20-TWC-10-57	LASS		0.296962		3.16787	0.246649	0.107183	0.453563	0.32984		3.57812	0.470082	0.316214	0.247759	0.32984		1760.63	7.19	1768.54	7.48	1751.25	16.27	-0.987295
20-TWC-10-59	LASS		0.0833166		3.19565	0.208783	0.107718	0.351295	0.344488		3.39099	0.364602	0.313376	0.206986	0.344488		1757.49	5.59	1755.09	6.29	1760.36	12.59	0.299371
20-TWC-10-61	LASS		0.114424		3.23593	0.285034	0.107513	0.522711	0.325577		3.44303	0.540457	0.309587	0.288658	0.325577		1745.44	8.29	1735.93	8.5	1756.86	18.74	1.19133
20-TWC-10-66	LASS		0.380349		3.22577	0.245	0.107182	0.438513	0.399062		6.52559	0.466972	0.310293	0.243465	0.399062		1745.5	6.67	1740.72	7.33	1751.23	15.73	0.60015
20-TWC-10-67	LASS		0.037782		3.40448	0.235124	0.107789	0.319997	0.542872		5.96039	0.379045	0.293968	0.240193	0.542872		1705.44	4.46	1660.15	6.74	1761.55	11.46	5.75629
20-TWC-10-68	LASS		0.0147393		3.31724	0.210781	0.107892	0.308022	0.397515		5.74924	0.320976	0.301579	0.216722	0.397515		1727.73	4.82	1698.52	6.17	1763.29	11.03	3.67325
20-TWC-10-69	LASS		0.341141		3.39325	0.256761	0.107771	0.488634	0.300166		5.31282	0.508537	0.295317	0.257551	0.300166		1708.04	7.76	1664.99	7.38	1761.25	17.51	5.46544
20-TWC-10-70	LASS		0.231823		3.22402	0.234664	0.107592	0.368553	0.418459		5.29162	0.409579	0.310656	0.236573	0.418459		1749.13	5.63	1741.55	7.02	1758.21	13.21	0.947555
20-TWC-10-71	LASS		0.0282978		3.32923	0.21744	0.107378	0.298678	0.391833		4.84172	0.303264	0.300432	0.222014	0.391833		1720.78	4.75	1693.14	6.35	1754.57	10.71	3.50114
20-TWC-10-80	LASS		0.107947		3.09564	0.201179	0.107658	0.379476	0.425661		4.73178	0.422811	0.323361	0.201492	0.425661		1783.66	5.69	1804.53	6.21	1759.33	13.6	-2.56916
20-TWC-10-81	LASS		0.204244		3.18165	0.363889	0.108237	0.527325	0.433605		4.67708	0.572335	0.315112	0.372419	0.433605		1765.18	8.1	1761.84	10.99	1769.13	18.88	0.412067
20-TWC-10-82	LASS		0.0641334		3.20563	0.262557	0.108078	0.371592	0.489082		4.64079	0.417214	0.312696	0.26178	0.489082		1757.67	5.47	1750.3	7.89	1766.44	13.31	0.913702
																			Weighted mean date (Ma)		1765	9	(95% conf.)
																			MSWD (n = 64)		1.7
*Ratios and associated uncertainties were reduced using the VizualAge UcomPbine data reduction scheme (Chew et al., 2014) of the Iolite 4.7.1 program.
†Dates and associated uncertainties were reduced by the IsoplotR program (Vermeesch, 2018) with a 238U/235U value of 137.818 (Hiess et al., 2012) and decay constants of λ238 = 1.551×10–10 yr–1 and λ235 = 9.849×10–10 yr–1 (Jaffey et al., 1971).
§Discordance (%) was calculated as [1-(206Pb/238U date/207Pb/206Pb date)]*100.
‡Reproducibility of FC-1 standard was propagated into errors for weighted mean 207Pb/206Pb dates.

## Sheet: Table S5
TABLE S5. SUMMARY OF LU-HF ISOTOPE FOR ZIRCON SAMPLES
Sample	Method		176Hf/177Hf	2se	176Lu/177Hf	2se	176Yb/177Hf	2se	178Hf/177Hf	2se	180Hf/177Hf	2se		εHf(i)	2se
20-TWC-17 amphibolite Tobacco Root Mountains
Assigned age: 1762 Ma
20-TWC-17-10	LASS		0.281647	4.7e-05	3.105e-05	8.4e-07	0.001328	4.8e-05	1.46725	9.8e-05	1.88796	0.00024		-0.544377	1.66204
20-TWC-17-11	LASS		0.281651	6.7e-05	4.53e-05	1.5e-06	0.001772	8.2e-05	1.46722	9.1e-05	1.88798	0.00014		-0.419283	2.36929
20-TWC-17-12	LASS		0.281677	5.7e-05	7.71e-05	3.1e-06	0.00271	0.00014	1.46723	8.5e-05	1.88814	0.00023		0.466053	2.01567
20-TWC-17-13	LASS		0.281686	5.8e-05	2.81e-05	3.8e-06	0.00112	0.00016	1.46726	7.2e-05	1.88817	0.00018		0.843767	2.05103
20-TWC-17-14	LASS		0.281665	5.8e-05	6.625e-05	6.9e-07	0.002508	6e-05	1.46722	7.3e-05	1.88784	0.00014		0.0528926	2.05103
20-TWC-17-15	LASS		0.281725	4.9e-05	2.66e-05	1.4e-06	0.001046	5.9e-05	1.46727	9e-05	1.88796	0.00026		2.23019	1.73277
20-TWC-17-16	LASS		0.281631	5.2e-05	3.21e-05	1.4e-06	0.001399	5.8e-05	1.46728	9.4e-05	1.88802	0.00021		-1.11368	1.83885
20-TWC-17-17	LASS		0.281643	6.1e-05	3.427e-05	8.3e-07	0.001444	6.4e-05	1.46725	7.9e-05	1.88795	0.00024		-0.690215	2.15712
20-TWC-17-18	LASS		0.281642	6.9e-05	4.53e-05	1.3e-06	0.001819	8.4e-05	1.46722	8.4e-05	1.88804	0.00023		-0.738816	2.44002
20-TWC-17-19	LASS		0.281714	6.9e-05	2.87e-05	2.2e-06	0.00115	9.1e-05	1.46721	8.6e-05	1.88794	0.0002		1.83716	2.44002
20-TWC-17-20	LASS		0.281694	7.3e-05	0.0001077	3.3e-06	0.003442	8e-05	1.46724	8.5e-05	1.88801	0.00024		1.03328	2.58147
												Mean value ± 2sd		0.268815	2.21705
20-TWC-27 quartzofeldspathic gneiss Tobacco Root Mountains
Assigned age: 2400 Ma
20-TWC-27-48	LASS		0.28113	2.13482e-05	0.00102318	7.34257e-06	0.0373434	0.000384267	1.46694	3.66861e-05	1.88834	9.98165e-05		-5.76559	0.754925
20-TWC-27-52	LASS		0.281123	2.72482e-05	0.00118125	6.7512e-05	0.0473172	0.00277818	1.46694	3.759e-05	1.88841	8.08657e-05		-6.26308	0.963567
20-TWC-27-54	LASS		0.281118	2.14401e-05	0.000823107	4.30977e-06	0.0309545	0.000258012	1.46694	4.68412e-05	1.88843	8.50397e-05		-5.87117	0.758177
20-TWC-27-55	LASS		0.28107	1.96678e-05	0.000674962	4.38872e-05	0.0221053	0.00124101	1.46693	3.62264e-05	1.88847	0.000100611		-7.33654	0.695504
20-TWC-27-70	LASS		0.28111	2.56925e-05	0.00142017	9.82048e-05	0.0466216	0.00292519	1.4669	3.38798e-05	1.88847	0.00010463		-7.13831	0.908551
20-TWC-27-79	LASS		0.281103	1.90583e-05	0.000784858	9.40235e-05	0.0264145	0.00296127	1.46694	4.02216e-05	1.88858	0.000100055		-6.34367	0.673952
20-TWC-27-80	LASS		0.281128	2.28911e-05	0.00107983	5.38909e-05	0.0353455	0.00143662	1.46691	3.9317e-05	1.88854	0.000115516		-5.91935	0.809488
20-TWC-27-85	LASS		0.281137	2.45263e-05	0.00121427	7.61427e-06	0.040353	0.000322073	1.46691	3.72669e-05	1.88864	0.000101374		-5.83441	0.867311
20-TWC-27-87	LASS		0.281218	2.64903e-05	0.00208272	4.78108e-05	0.0660799	0.00200334	1.46688	4.33736e-05	1.88858	0.000135026		-4.35458	0.936766
20-TWC-27-88	LASS		0.281155	1.74431e-05	0.00104633	1.72412e-05	0.0366145	0.00116366	1.46692	3.46421e-05	1.88863	8.18523e-05		-4.91767	0.616832
												Mean value ± 2sd		-5.97444	1.7947
Assigned age: 1733 Ma
20-TWC-27-47	LASS		0.281264	1.35882e-05	0.000135901	7.07814e-06	0.00537842	0.000328016	1.46693	3.70817e-05	1.88839	0.000110291		-14.929	0.480514
20-TWC-27-50	LASS		0.281249	2.03607e-05	0.000166699	1.09595e-05	0.007151	0.000562862	1.46694	3.33567e-05	1.88842	0.000109768		-15.4901	0.720005
20-TWC-27-51	LASS		0.281305	1.51852e-05	0.000210184	1.08334e-05	0.00737326	0.000487508	1.46693	3.88526e-05	1.88841	0.000105611		-13.5681	0.536986
20-TWC-27-53	LASS		0.281317	2.19149e-05	0.000690787	4.49154e-06	0.0231679	0.000418629	1.46694	3.43453e-05	1.88847	7.96201e-05		-13.7052	0.774968
20-TWC-27-56	LASS		0.281212	1.44568e-05	0.000241844	7.82567e-06	0.00854977	0.000316153	1.46694	3.2133e-05	1.88846	7.50921e-05		-16.8944	0.51123
20-TWC-27-57	LASS		0.281273	1.65882e-05	0.00021183	9.65939e-06	0.00727325	0.000279869	1.46692	3.29825e-05	1.88847	7.53958e-05		-14.7049	0.5866
20-TWC-27-60	LASS		0.281255	1.54759e-05	0.000165025	5.87099e-06	0.00588136	0.000257203	1.46693	3.79126e-05	1.88845	0.000101787		-15.28	0.547269
20-TWC-27-61	LASS		0.281275	1.72731e-05	0.000278492	1.29553e-05	0.0114578	0.000615652	1.46692	3.41361e-05	1.88845	8.45713e-05		-14.6893	0.610821
20-TWC-27-63	LASS		0.281271	2.22798e-05	0.00018392	1.41912e-05	0.00563315	0.000293585	1.46687	5.26206e-05	1.88829	0.000128544		-14.725	0.787869
20-TWC-27-64	LASS		0.281238	2.1852e-05	9.00448e-05	5.71839e-06	0.00361399	0.000250365	1.46694	3.31754e-05	1.88856	9.62412e-05		-15.803	0.772744
20-TWC-27-65	LASS		0.281258	1.78047e-05	0.000249776	1.16486e-05	0.00954054	0.000198323	1.46693	4.02236e-05	1.88842	0.000110449		-15.2751	0.629621
20-TWC-27-66	LASS		0.281272	1.66111e-05	0.000178729	1.7866e-05	0.00713494	0.000818303	1.46694	3.6948e-05	1.88851	9.69182e-05		-14.6858	0.587411
20-TWC-27-67	LASS		0.281254	1.81381e-05	0.00035106	2.8002e-05	0.0138662	0.00122082	1.46694	4.47604e-05	1.88851	0.000106436		-15.5434	0.641409
20-TWC-27-71	LASS		0.281226	1.61186e-05	9.8769e-05	4.91309e-06	0.00394543	0.000267658	1.46691	3.77764e-05	1.88843	0.000101663		-16.2202	0.569996
20-TWC-27-72	LASS		0.281197	1.7623e-05	0.000568874	2.86625e-05	0.019069	0.000743182	1.46692	3.88651e-05	1.88855	0.000104285		-17.8221	0.623193
20-TWC-27-75	LASS		0.281193	2.21498e-05	0.000241237	3.70204e-06	0.00772242	3.88866e-05	1.4669	3.77459e-05	1.88859	9.71727e-05		-17.5723	0.783272
20-TWC-27-76	LASS		0.281304	2.25622e-05	0.000516809	4.6538e-05	0.017989	0.00137961	1.46692	3.2437e-05	1.88855	9.75303e-05		-13.9381	0.797856
20-TWC-27-78	LASS		0.281264	2.2726e-05	0.000163105	1.41387e-05	0.0062559	0.000497879	1.46694	4.62154e-05	1.88853	8.32938e-05		-14.9743	0.803649
20-TWC-27-82	LASS		0.281235	1.90293e-05	0.00016053	7.75054e-06	0.00681816	0.000391142	1.46692	4.70625e-05	1.88857	0.000110774		-16.0047	0.672924
20-TWC-27-83	LASS		0.281213	1.45553e-05	0.00022536	7.76595e-06	0.00792796	0.000263942	1.46689	4.9305e-05	1.88862	9.9688e-05		-16.834	0.514711
20-TWC-27-86	LASS		0.281285	2.1974e-05	0.000206858	3.70217e-06	0.00703028	0.000103094	1.46688	3.19919e-05	1.88859	0.000102568		-14.2782	0.777057
20-TWC-27-89	LASS		0.281195	2.42882e-05	0.000187302	1.10441e-05	0.00588397	0.000321432	1.46687	4.09152e-05	1.8887	0.000107662		-17.442	0.858894
20-TWC-27-90	LASS		0.281236	1.85886e-05	0.000141649	2.14011e-06	0.0054716	8.7672e-05	1.4669	2.94419e-05	1.88864	8.32238e-05		-15.9311	0.65734
												Mean value ± 2sd		-15.4718	2.47547
HM11-9 granitic gneiss Highland Mountains
Assigned age: 1802 Ma
HM11-9-43	LASS		0.281671	1.40207e-05	0.000914383	7.44058e-05	0.0299937	0.00211697	1.46711	3.0073e-05	1.8875	6.94927e-05		0.151244	0.495806
HM11-9-44	LASS		0.281726	2.98085e-05	0.00154021	0.000212945	0.0554733	0.00816276	1.46705	6.76765e-05	1.88737	0.000153565		1.35196	1.05411
HM11-9-46	LASS		0.281695	2.84687e-05	0.00144586	0.000182674	0.0512015	0.0079008	1.46708	3.88675e-05	1.88736	8.07771e-05		0.371198	1.00673
HM11-9-48	LASS		0.281736	2.83264e-05	0.00282852	0.00045091	0.0824194	0.0128059	1.46706	4.23858e-05	1.88737	0.000112576		0.138932	1.00169
HM11-9-49	LASS		0.281731	2.8202e-05	0.0017974	7.29822e-05	0.0581498	0.00274963	1.46707	3.46134e-05	1.88743	0.000100287		1.19672	0.997294
HM11-9-51	LASS		0.281771	2.53653e-05	0.00244011	5.18255e-05	0.0885275	0.000664124	1.46706	5.49632e-05	1.8875	0.000120343		1.85968	0.896981
HM11-9-52	LASS		0.281713	2.26438e-05	0.00152018	3.88424e-05	0.0543306	0.00230484	1.46709	3.46965e-05	1.88744	9.66243e-05		0.904889	0.800742
HM11-9-53	LASS		0.281701	2.91983e-05	0.00165922	9.40488e-05	0.0575074	0.00228749	1.46705	3.99523e-05	1.88747	8.90588e-05		0.31665	1.03253
HM11-9-54	LASS		0.281706	2.34971e-05	0.00147669	2.89339e-05	0.0501525	0.001793	1.46705	3.90342e-05	1.88751	8.41446e-05		0.714163	0.830919
HM11-9-55	LASS		0.281663	2.33667e-05	0.00110395	4.40533e-05	0.0355174	0.00188181	1.46706	4.32251e-05	1.88744	0.000118166		-0.371527	0.826307
HM11-9-56	LASS		0.281714	2.68219e-05	0.00127481	5.42361e-05	0.0486374	0.00170641	1.46704	4.48417e-05	1.88748	0.000107282		1.24394	0.948492
HM11-9-57	LASS		0.281675	2.78248e-05	0.00233539	0.000236026	0.0705767	0.00547788	1.46704	3.65971e-05	1.88745	0.000104878		-1.42747	0.983956
HM11-9-58	LASS		0.281678	2.60032e-05	0.0014881	0.000110838	0.0464454	0.00330117	1.46701	4.21696e-05	1.88738	8.30187e-05		-0.286341	0.91954
HM11-9-59	LASS		0.281635	2.42462e-05	0.00108296	7.23296e-05	0.0384888	0.00315631	1.46704	5.67193e-05	1.8875	7.85734e-05		-1.33146	0.857407
HM11-9-60	LASS		0.281755	2.54633e-05	0.00248323	3.52393e-05	0.0767126	0.000937729	1.46706	3.04467e-05	1.88752	9.31462e-05		1.2363	0.900446
HM11-9-61	LASS		0.281686	2.07365e-05	0.00100613	7.79933e-05	0.0327586	0.00315928	1.46707	4.74903e-05	1.88755	0.000106899		0.579633	0.733294
HM11-9-62	LASS		0.281717	1.70006e-05	0.00156993	4.75139e-05	0.0553055	0.00288338	1.46706	4.04332e-05	1.88755	7.65194e-05		0.977271	0.601186
HM11-9-63	LASS		0.281755	3.07959e-05	0.00206896	0.000325862	0.078432	0.0126887	1.46699	5.79779e-05	1.88743	0.000128848		1.73593	1.08902
HM11-9-64	LASS		0.281672	2.26376e-05	0.000660892	9.91529e-05	0.0229375	0.00372912	1.46703	4.41199e-05	1.88745	0.000108761		0.494339	0.800525
HM11-9-65	LASS		0.281718	2.50355e-05	0.00149574	6.47561e-05	0.0550003	0.00257874	1.46704	3.61533e-05	1.88754	9.4389e-05		1.12721	0.88532
HM11-9-66	LASS		0.281715	2.9994e-05	0.00148003	0.000114945	0.0525636	0.00486628	1.46708	3.58779e-05	1.88762	0.000111255		1.02378	1.06067
HM11-9-67	LASS		0.281649	2.40227e-05	0.00100863	8.99043e-05	0.0355266	0.00310394	1.4671	4.5406e-05	1.8876	0.0001039		-0.749266	0.849504
HM11-9-68	LASS		0.281716	2.91944e-05	0.00157134	9.00389e-05	0.0573077	0.00281489	1.4671	4.29029e-05	1.88762	7.3269e-05		0.968368	1.03239
HM11-9-69	LASS		0.281686	3.33345e-05	0.00110151	0.000110947	0.04033	0.00411384	1.46708	3.96511e-05	1.88771	0.000123711		0.471923	1.17879
HM11-9-70	LASS		0.281709	2.28327e-05	0.00152022	0.000110069	0.0560888	0.00429483	1.46702	3.43709e-05	1.88759	9.34134e-05		0.756977	0.807424
HM11-9-71	LASS		0.281682	2.84501e-05	0.00145739	0.000141265	0.0479484	0.00483427	1.46703	4.0974e-05	1.88753	0.00012905		-0.130217	1.00607
HM11-9-72	LASS		0.281686	2.27301e-05	0.000524206	4.30152e-05	0.0204228	0.00220011	1.46706	4.29877e-05	1.88765	0.000104664		1.14897	0.803793
HM11-9-73	LASS		0.281661	2.39001e-05	0.000994214	3.49147e-05	0.0350909	0.00170963	1.46702	4.03745e-05	1.88758	8.19015e-05		-0.300383	0.845169
HM11-9-74	LASS		0.281691	2.2797e-05	0.0011446	8.94019e-05	0.039239	0.00331568	1.46705	3.45679e-05	1.88758	0.000100117		0.587375	0.80616
HM11-9-75	LASS		0.281689	1.98713e-05	0.00156472	0.000112617	0.0517263	0.00402203	1.46704	4.41248e-05	1.8877	0.00010675		-0.00485043	0.7027
HM11-9-77	LASS		0.281683	2.29592e-05	0.00123032	6.59348e-05	0.0411502	0.00253677	1.46703	4.31256e-05	1.88767	8.77968e-05		0.19839	0.811895
HM11-9-78	LASS		0.281613	3.18183e-05	0.00128593	8.1157e-05	0.0429619	0.0036039	1.46704	4.40097e-05	1.88767	0.000120374		-2.35365	1.12518
HM11-9-79	LASS		0.281677	2.56386e-05	0.00148721	7.92906e-05	0.0425682	0.00138806	1.46701	3.87423e-05	1.88751	0.000100886		-0.334244	0.906645
												Mean value ± 2sd		0.37171	1.85404
20-TWC-26 gedrite gneiss Northern Madison Range
Assigned age: 2433 Ma
20-TWC-26-1	LASS		0.280949	2.46004e-05	6.01241e-06	2.61611e-07	0.00026053	1.59539e-05	1.4672	5.13193e-05	1.88705	0.000103625		-9.76409	0.869932
20-TWC-26-2	LASS		0.280951	1.86281e-05	0.000163017	1.01553e-05	0.00603607	0.00036562	1.46719	3.27063e-05	1.88705	0.000102302		-9.96737	0.658738
20-TWC-26-3	LASS		0.280977	1.69592e-05	0.000133741	1.58319e-05	0.0048912	0.000490229	1.46723	3.78754e-05	1.88706	8.94694e-05		-8.9785	0.599721
20-TWC-26-4	LASS		0.281007	2.31558e-05	0.00103479	5.06425e-05	0.0323556	0.00184579	1.46721	3.62483e-05	1.88708	7.23537e-05		-9.40619	0.818848
20-TWC-26-5	LASS		0.280988	2.2632e-05	0.000456733	5.04253e-05	0.0144878	0.0013936	1.46722	3.37772e-05	1.88709	8.0882e-05		-9.136	0.800325
20-TWC-26-7	LASS		0.280967	2.11248e-05	4.49173e-05	1.34917e-05	0.00125613	0.000334026	1.46719	4.45227e-05	1.88711	8.27676e-05		-9.21413	0.747029
20-TWC-26-8	LASS		0.280959	1.48365e-05	1.71041e-05	1.46426e-06	0.000606362	3.85585e-05	1.46721	3.43445e-05	1.88702	9.85796e-05		-9.445	0.524658
20-TWC-26-10	LASS		0.280964	2.28501e-05	9.31258e-06	3.1265e-07	0.000386765	1.79113e-05	1.4672	4.83843e-05	1.88708	9.15189e-05		-9.22885	0.808036
20-TWC-26-11	LASS		0.280961	1.84587e-05	4.14398e-06	1.99932e-07	0.0001679	1.3166e-05	1.46721	3.4737e-05	1.88701	0.000103486		-9.35337	0.652747
20-TWC-26-12	LASS		0.280958	2.10176e-05	4.42723e-05	2.49793e-05	0.00122514	0.000626805	1.46722	3.59916e-05	1.88711	9.48973e-05		-9.51881	0.743235
20-TWC-26-14	LASS		0.280972	1.95305e-05	9.2461e-05	7.45684e-06	0.00356882	0.000295343	1.46722	3.63816e-05	1.88709	8.72973e-05		-9.09206	0.69065
20-TWC-26-15	LASS		0.28097	1.7238e-05	5.0653e-05	6.65515e-06	0.00210353	0.000279894	1.46722	3.44395e-05	1.88704	9.10582e-05		-9.10984	0.60958
20-TWC-26-16	LASS		0.280966	1.71127e-05	2.79817e-05	8.10742e-07	0.000908511	1.6151e-05	1.46723	3.56855e-05	1.88705	8.52301e-05		-9.21679	0.605148
20-TWC-26-17	LASS		0.280965	1.95876e-05	4.98763e-05	7.832e-06	0.00195645	0.000283818	1.46721	4.05933e-05	1.88706	9.67308e-05		-9.29338	0.692667
20-TWC-26-18	LASS		0.280982	2.33821e-05	1.97189e-05	1.13946e-06	0.000725414	3.70867e-05	1.46721	4.28614e-05	1.88701	0.000100761		-8.60474	0.826849
20-TWC-26-19	LASS		0.280978	2.0441e-05	7.47775e-05	1.37649e-05	0.00303935	0.000502047	1.46722	3.90581e-05	1.88709	7.91454e-05		-8.86869	0.722846
20-TWC-26-20	LASS		0.280964	2.44825e-05	2.11222e-05	9.4066e-06	0.000601227	0.000211462	1.46717	5.54315e-05	1.88707	0.000122971		-9.26327	0.865765
20-TWC-26-22	LASS		0.280961	1.65269e-05	0.000137653	4.65976e-06	0.00568687	0.000279518	1.46724	3.28924e-05	1.88712	7.61055e-05		-9.5509	0.584433
20-TWC-26-23	LASS		0.280978	2.08495e-05	3.00413e-05	2.84638e-06	0.00118327	0.000132402	1.4672	4.18447e-05	1.88708	8.40975e-05		-8.78241	0.737293
20-TWC-26-24	LASS		0.280993	2.57829e-05	8.43454e-05	2.60532e-05	0.0027379	0.000757793	1.46722	3.8628e-05	1.88701	9.2396e-05		-8.33222	0.911749
20-TWC-26-25	LASS		0.281008	2.83647e-05	0.000421861	9.13326e-05	0.0121072	0.00265863	1.46722	6.72228e-05	1.88703	9.7922e-05		-8.36538	1.00305
												Mean value ± 2sd		-9.16629	0.825725
Assigned age: 1800 Ma
20-TWC-26-6	LASS		0.281235	2.53411e-05	0.000387436	7.69703e-05	0.0121724	0.00238339	1.46721	4.01668e-05	1.88716	8.79542e-05		-14.7382	0.896126
20-TWC-12 amphibolite Ruby Range
Assigned age: 2745 Ma
20-TWC-12-54	LASS		0.281132	2.41571e-05	0.001141	6.75189e-05	0.0407125	0.00295964	1.46704	4.02471e-05	1.88786	0.000105475		1.91725	0.854258
20-TWC-12-68	LASS		0.281091	2.61804e-05	0.000895972	7.61884e-05	0.0314598	0.00290686	1.46703	3.8727e-05	1.88783	0.000106565		0.903691	0.925807
20-TWC-12-91	LASS		0.281052	2.91964e-05	0.000704564	5.13387e-06	0.0258302	0.000663484	1.46696	3.89041e-05	1.88806	0.000118214		-0.106983	1.03246
												Mean value ± 2sd		0.904651	2.02423
Assigned age: 2422 Ma
20-TWC-12-56	LASS		0.281244	2.55116e-05	0.00164476	7.66562e-05	0.0490897	0.00272908	1.46703	3.84901e-05	1.88777	9.01271e-05		-2.2274	0.902156
20-TWC-12-57	LASS		0.28127	2.98506e-05	0.00142881	8.20061e-05	0.0448382	0.00172321	1.46701	3.67e-05	1.88781	0.000105776		-0.966718	1.05559
20-TWC-12-58	LASS		0.281246	2.2392e-05	0.00162825	0.000109002	0.0510319	0.00259503	1.46698	4.52891e-05	1.88782	9.89764e-05		-2.14241	0.791839
20-TWC-12-61	LASS		0.281231	2.78115e-05	0.00156586	0.00011793	0.0482822	0.00489519	1.46704	4.45305e-05	1.88782	0.000105915		-2.55592	0.983485
20-TWC-12-62	LASS		0.281256	2.93871e-05	0.00112862	6.70856e-05	0.0358251	0.00253849	1.46705	6.78145e-05	1.88775	0.000118906		-0.976834	1.0392
20-TWC-12-66	LASS		0.281208	2.88236e-05	0.00131341	1.52355e-05	0.0421798	0.000657546	1.46701	6.88566e-05	1.88773	0.00014167		-2.96659	1.01928
20-TWC-12-70	LASS		0.281241	2.19034e-05	0.000802611	1.20809e-05	0.0243478	0.000404174	1.46704	5.6941e-05	1.88795	0.000134727		-0.944991	0.77456
20-TWC-12-71	LASS		0.28125	4.18e-05	0.00131482	5.56418e-05	0.0382543	0.00200266	1.46702	5.45282e-05	1.88787	0.000168149		-1.47326	1.47815
20-TWC-12-72	LASS		0.281232	2.26091e-05	0.00145891	6.16488e-05	0.0419043	0.0013194	1.46706	3.44527e-05	1.88794	9.22455e-05		-2.35594	0.799514
20-TWC-12-76	LASS		0.281282	2.79757e-05	0.00194154	0.00019674	0.0602633	0.00531702	1.467	4.87035e-05	1.8879	0.000152569		-1.37795	0.989293
20-TWC-12-78	LASS		0.281266	2.36378e-05	0.00106604	9.15837e-05	0.0311049	0.00215827	1.46697	4.19473e-05	1.88792	0.000117695		-0.491165	0.835894
20-TWC-12-79	LASS		0.2812	3.74189e-05	0.00114813	6.99507e-05	0.0370841	0.00259271	1.46695	4.9714e-05	1.88794	0.000109497		-2.97628	1.32323
20-TWC-12-80	LASS		0.281276	2.27372e-05	0.00156964	8.928e-05	0.0467352	0.00249523	1.46704	2.93053e-05	1.88794	8.28687e-05		-0.981727	0.804045
20-TWC-12-81	LASS		0.28123	1.97458e-05	0.00146204	4.45396e-05	0.0437249	0.00082253	1.46701	4.09733e-05	1.88789	8.62744e-05		-2.44741	0.69826
20-TWC-12-83	LASS		0.281253	3.0291e-05	0.00144424	0.000139039	0.0429726	0.00503797	1.46704	6.28416e-05	1.88797	0.000146861		-1.58482	1.07117
20-TWC-12-84	LASS		0.281279	3.96063e-05	0.00186209	7.37152e-05	0.0613664	0.00219387	1.46697	7.40079e-05	1.88797	0.000166909		-1.33148	1.40058
20-TWC-12-87	LASS		0.281256	1.83987e-05	0.00162309	2.41441e-05	0.047785	0.000470717	1.46699	5.27502e-05	1.88797	0.000122882		-1.76484	0.650625
20-TWC-12-89	LASS		0.281296	2.74811e-05	0.00110997	0.00018035	0.0350881	0.00496692	1.46699	3.42609e-05	1.88805	8.65647e-05		0.482759	0.971801
20-TWC-12-93	LASS		0.281235	2.52406e-05	0.00169054	0.000134779	0.0523161	0.00392468	1.46696	4.10604e-05	1.88801	0.000106696		-2.63283	0.892571
20-TWC-12-95	LASS		0.281238	1.87837e-05	0.00149588	8.35749e-05	0.0414934	0.00268709	1.46701	3.37861e-05	1.88804	9.7272e-05		-2.20975	0.664238
												Mean value ± 2sd		-1.69628	1.79115
Assigned age: 1771 Ma
20-TWC-12-55	LASS		0.281342	2.15704e-05	0.000830552	0.000123149	0.0275293	0.00374746	1.46703	4.43352e-05	1.88767	0.000126202		-12.1337	0.762785
20-TWC-12-59	LASS		0.281366	2.06809e-05	0.000466924	4.01002e-06	0.0191316	0.00016551	1.46702	4.27713e-05	1.88782	8.61234e-05		-10.8448	0.73133
20-TWC-12-60	LASS		0.281369	1.89137e-05	0.000247191	8.79484e-06	0.0102469	0.000420089	1.46703	4.26741e-05	1.88783	9.66127e-05		-10.4807	0.668835
20-TWC-12-63	LASS		0.281365	1.93445e-05	0.000241648	4.62027e-06	0.00992896	0.000145854	1.46702	4.14144e-05	1.88783	0.000105874		-10.5877	0.68407
20-TWC-12-64	LASS		0.281366	1.70688e-05	0.000283808	5.16204e-06	0.012735	0.000152581	1.46702	4.40025e-05	1.88776	0.000100262		-10.6022	0.603598
20-TWC-12-65	LASS		0.281358	1.29754e-05	0.00016222	1.06142e-05	0.00685921	0.000524256	1.46704	3.31128e-05	1.88792	8.87805e-05		-10.7389	0.458843
20-TWC-12-69	LASS		0.281392	2.83921e-05	0.000225425	1.16806e-05	0.0104059	0.000957351	1.46702	6.12113e-05	1.8879	0.000163347		-9.61594	1.00402
20-TWC-12-73	LASS		0.281394	3.59348e-05	0.000517139	7.70436e-05	0.0166889	0.00246877	1.46694	5.12848e-05	1.88783	0.000169731		-9.89212	1.27075
20-TWC-12-74	LASS		0.281373	2.35595e-05	0.000250346	2.06986e-05	0.0109728	0.000858344	1.46703	4.55524e-05	1.88799	8.9723e-05		-10.3422	0.833125
20-TWC-12-82	LASS		0.281394	2.22955e-05	0.000108841	7.98602e-06	0.00488407	0.000386621	1.46696	5.38102e-05	1.88789	0.000112204		-9.40849	0.788427
20-TWC-12-85	LASS		0.281357	1.43748e-05	0.000129717	2.97224e-06	0.00510085	0.000203088	1.46701	3.70704e-05	1.888	0.000101824		-10.7606	0.508331
20-TWC-12-86	LASS		0.281393	2.05427e-05	0.000161728	6.82064e-06	0.00700557	0.000283054	1.467	3.9426e-05	1.88798	0.0001052		-9.51149	0.726443
20-TWC-12-92	LASS		0.281368	1.91317e-05	0.000301925	1.42565e-05	0.0129388	0.000480676	1.467	3.85355e-05	1.88807	8.87677e-05		-10.5512	0.676547
20-TWC-12-94	LASS		0.281401	1.99834e-05	0.000422777	4.80416e-05	0.0163082	0.00110838	1.46698	3.85874e-05	1.88801	0.000105719		-9.54213	0.706665
20-TWC-12-96	LASS		0.281443	2.26668e-05	0.000265086	3.19026e-06	0.0120382	0.000299048	1.46696	4.73954e-05	1.88806	0.000111007		-7.86429	0.801557
												Mean value ± 2sd		-10.1918	1.90621
20-TWC-15 leucogneiss Ruby Range
Assigned age: 2764 Ma
20-TWC-15-62	LASS		0.281139	2.23853e-05	0.00106277	6.25137e-06	0.0320439	0.000894016	1.46697	3.02942e-05	1.88811	8.85732e-05		2.75598	0.791601
20-TWC-15-64	LASS		0.281155	2.39728e-05	0.000954695	0.00014835	0.0357692	0.0052143	1.46697	4.30089e-05	1.88812	0.000101489		3.51425	0.84774
20-TWC-15-67	LASS		0.281202	2.30673e-05	0.00133436	9.60419e-05	0.0391081	0.00232175	1.46694	5.77443e-05	1.88799	0.00014915		4.47044	0.815718
20-TWC-15-69	LASS		0.281196	3.10546e-05	0.00155572	0.000113625	0.0601286	0.00548197	1.46696	4.81149e-05	1.88809	9.45149e-05		3.85732	1.09817
20-TWC-15-70	LASS		0.281227	2.51346e-05	0.00195349	3.0066e-05	0.0766783	0.00118111	1.46699	3.7337e-05	1.88824	9.36769e-05		4.21126	0.888824
20-TWC-15-80	LASS		0.281217	2.89855e-05	0.00173314	8.83482e-05	0.0615672	0.00277446	1.46698	4.13557e-05	1.88826	0.000110848		4.26604	1.025
20-TWC-15-82	LASS		0.281206	2.60969e-05	0.00170997	0.000131094	0.0623966	0.0054465	1.467	3.46583e-05	1.88828	9.96529e-05		3.9045	0.922852
20-TWC-15-83	LASS		0.281221	3.04018e-05	0.00175064	0.000120217	0.0568274	0.00245442	1.46694	3.99236e-05	1.88822	0.000101049		4.35412	1.07508
20-TWC-15-88	LASS		0.28121	3.73921e-05	0.00163039	0.000121638	0.0570852	0.00437015	1.46697	4.91544e-05	1.88818	9.92475e-05		4.21675	1.32228
20-TWC-15-92	LASS		0.281231	4.04224e-05	0.00169783	0.000152257	0.0590796	0.00293943	1.46693	4.97103e-05	1.88819	0.000116987		4.8119	1.42944
20-TWC-15-93	LASS		0.281182	3.98811e-05	0.00155255	4.8896e-05	0.0545725	0.00116787	1.46694	5.89787e-05	1.88824	0.000141819		3.34513	1.4103
20-TWC-15-95	LASS		0.281238	2.25806e-05	0.00185677	5.98993e-05	0.0647663	0.00237792	1.46697	3.93225e-05	1.88817	9.54034e-05		4.78835	0.798508
20-TWC-15-105	LASS		0.281116	2.52246e-05	0.000931583	8.49966e-05	0.0360664	0.00400764	1.46695	4.63325e-05	1.88829	0.000118263		2.17046	0.892005
20-TWC-15-114	LASS		0.281184	3.09849e-05	0.00137914	6.04756e-05	0.0501662	0.00302636	1.46692	4.03732e-05	1.88832	0.000117217		3.74735	1.09571
20-TWC-15-118	LASS		0.281161	3.04026e-05	0.00187614	0.000142437	0.0580224	0.00386186	1.46719	5.09241e-05	1.88701	0.000108773		1.98417	1.07511
20-TWC-15-122	LASS		0.281103	2.64358e-05	0.0013504	1.69893e-05	0.0449905	0.0007895	1.46719	4.66663e-05	1.88701	0.000106534		0.930346	0.934838
20-TWC-15-123	LASS		0.281164	3.18273e-05	0.0023952	0.000241669	0.0752108	0.00596696	1.46721	5.62731e-05	1.88705	9.93068e-05		1.13963	1.1255
20-TWC-15-126	LASS		0.281116	2.3128e-05	0.0016429	8.77264e-05	0.0509332	0.00334549	1.4672	3.70109e-05	1.88709	8.46881e-05		0.837206	0.817865
20-TWC-15-127	LASS		0.28113	2.92065e-05	0.00186571	8.54714e-05	0.0629767	0.00249986	1.46718	4.56427e-05	1.88699	9.95888e-05		0.925861	1.03282
20-TWC-15-128	LASS		0.281124	3.41433e-05	0.00165213	0.000111259	0.0485399	0.00313275	1.46714	4.99725e-05	1.88701	0.000110764		1.10734	1.20739
20-TWC-15-130	LASS		0.281104	2.99238e-05	0.00135823	7.87172e-05	0.0447115	0.00263237	1.46719	4.15472e-05	1.88708	0.000109245		0.928936	1.05818
20-TWC-15-133	LASS		0.281155	2.38161e-05	0.00141471	0.00014708	0.0457366	0.00493331	1.46723	2.94241e-05	1.88709	9.06467e-05		2.6422	0.842198
20-TWC-15-135	LASS		0.28116	2.58666e-05	0.00178871	5.18245e-05	0.0526067	0.00173871	1.46722	3.9233e-05	1.88708	9.97249e-05		2.14132	0.914709
20-TWC-15-136	LASS		0.28116	3.29897e-05	0.0015907	0.000137125	0.0472428	0.00357463	1.46717	5.53368e-05	1.88699	7.95551e-05		2.51268	1.1666
20-TWC-15-137	LASS		0.281148	2.51267e-05	0.0017749	6.20727e-05	0.0570062	0.00222741	1.4672	5.30584e-05	1.88702	9.52487e-05		1.73733	0.888546
20-TWC-15-138	LASS		0.281154	2.79538e-05	0.0015356	3.2197e-05	0.0443975	0.00114839	1.46719	4.1139e-05	1.88708	8.03512e-05		2.37841	0.988519
20-TWC-15-140	LASS		0.281146	3.11634e-05	0.00173406	0.000120236	0.0555465	0.00460891	1.46724	4.69208e-05	1.88715	0.000109558		1.72302	1.10202
20-TWC-15-141	LASS		0.281139	2.7283e-05	0.00169326	2.42317e-05	0.0495029	0.00111808	1.46722	4.3882e-05	1.887	8.19267e-05		1.54101	0.964796
20-TWC-15-144	LASS		0.281149	2.32508e-05	0.00167241	8.79309e-05	0.049574	0.00276622	1.46723	4.97561e-05	1.88709	0.000100622		1.95192	0.822206
20-TWC-15-146	LASS		0.281157	2.35548e-05	0.00157131	3.20302e-05	0.0481605	0.000843261	1.46718	4.48166e-05	1.88697	9.91595e-05		2.4098	0.832958
20-TWC-15-147	LASS		0.281132	3.34795e-05	0.00146	5.71539e-05	0.0438504	0.00201237	1.46723	5.83379e-05	1.88713	0.000110588		1.73209	1.18392
20-TWC-15-149	LASS		0.281124	2.54221e-05	0.00170562	4.68644e-05	0.0502479	0.00169426	1.46723	4.79375e-05	1.88711	0.000110278		0.986438	0.89899
20-TWC-15-150	LASS		0.281176	3.81087e-05	0.00209206	0.000214998	0.0670334	0.00646146	1.46723	5.22331e-05	1.88704	0.000118259		2.13022	1.34762
20-TWC-15-152	LASS		0.281109	2.55011e-05	0.00151912	8.68312e-05	0.0478019	0.00246475	1.46718	4.24396e-05	1.88698	9.44657e-05		0.826816	0.901785
20-TWC-15-153	LASS		0.281135	2.68136e-05	0.00162767	1.9386e-05	0.0495544	0.00122332	1.46722	4.30109e-05	1.88707	0.000110153		1.55121	0.948197
20-TWC-15-154	LASS		0.281136	2.39028e-05	0.00128122	0.000190761	0.0425777	0.00604827	1.46722	2.99272e-05	1.88709	0.000105714		2.24394	0.845264
20-TWC-15-155	LASS		0.281131	3.65803e-05	0.00133521	0.000113046	0.0429895	0.00376565	1.46719	4.55533e-05	1.88711	0.000112835		1.93286	1.29357
20-TWC-15-156	LASS		0.281126	3.01241e-05	0.00143956	0.000106482	0.0444736	0.00257245	1.46721	4.30421e-05	1.88708	7.23713e-05		1.57599	1.06527
20-TWC-15-157	LASS		0.28112	3.24083e-05	0.0014726	0.000103867	0.0499405	0.00416745	1.46722	4.78167e-05	1.88707	0.000127808		1.27958	1.14604
20-TWC-15-161	LASS		0.281119	3.39361e-05	0.00152742	9.44994e-05	0.0503556	0.00383082	1.46722	4.79387e-05	1.88714	0.000107792		1.16151	1.20007
20-TWC-15-163	LASS		0.281159	2.8012e-05	0.00159307	0.000172929	0.0509591	0.00517511	1.46719	4.45571e-05	1.88704	0.000108365		2.44709	0.990577
20-TWC-15-165	LASS		0.281184	3.70865e-05	0.0020853	7.56571e-05	0.0607432	0.00186147	1.46719	5.68397e-05	1.88712	0.000136929		2.43508	1.31147
20-TWC-15-166	LASS		0.28116	3.66266e-05	0.00141874	0.000117585	0.0433935	0.00396243	1.46719	4.62509e-05	1.88706	0.000142052		2.80788	1.29521
20-TWC-15-167	LASS		0.281145	2.91323e-05	0.00187346	0.000106373	0.0587325	0.00321149	1.4672	5.74852e-05	1.88695	0.000130564		1.42944	1.03019
												Mean value ± 2sd		2.40557	2.42252
Assigned age: 2465 Ma
20-TWC-15-61	LASS		0.281179	2.41035e-05	0.00105111	0.00022287	0.0376248	0.00759726	1.46695	4.07135e-05	1.88809	8.89347e-05		-2.60601	0.852361
20-TWC-15-63	LASS		0.281302	2.47003e-05	0.00184329	0.000310378	0.0560729	0.00772002	1.46698	4.63399e-05	1.88807	9.50105e-05		0.45614	0.873466
20-TWC-15-65	LASS		0.281168	2.08242e-05	0.000431896	9.68929e-05	0.0149027	0.00249991	1.46701	3.29041e-05	1.88817	8.71681e-05		-1.94436	0.736398
20-TWC-15-66	LASS		0.281185	2.76819e-05	0.0010569	0.000184927	0.0333047	0.00576363	1.46695	4.68415e-05	1.88797	0.000108306		-2.37962	0.978904
20-TWC-15-72	LASS		0.281266	3.08569e-05	0.0014493	0.000269858	0.0468802	0.00790987	1.46693	4.78091e-05	1.88808	7.57945e-05		-0.167562	1.09118
20-TWC-15-76	LASS		0.281165	2.02469e-05	0.000576132	0.000108642	0.0196042	0.00275827	1.46696	3.89813e-05	1.88813	0.000108973		-2.31688	0.715983
20-TWC-15-77	LASS		0.281257	2.65039e-05	0.000979631	0.000174263	0.0358559	0.00496804	1.46698	3.89469e-05	1.8881	0.00011485		0.284374	0.937247
20-TWC-15-79	LASS		0.281198	2.6383e-05	0.00126934	7.91401e-05	0.0458246	0.0029072	1.46697	4.18462e-05	1.88823	9.41165e-05		-2.29951	0.932972
20-TWC-15-81	LASS		0.281149	1.63492e-05	0.000259672	7.11178e-06	0.0108341	0.000378785	1.46698	3.38046e-05	1.88821	9.24258e-05		-2.32806	0.578149
20-TWC-15-86	LASS		0.281199	2.5043e-05	0.000907707	0.000237801	0.0291922	0.00690455	1.46692	3.22399e-05	1.88821	9.03688e-05		-1.65946	0.885585
20-TWC-15-87	LASS		0.281192	2.61425e-05	0.000909459	0.000195988	0.0319246	0.00582119	1.46694	4.2897e-05	1.88816	0.00010801		-1.8877	0.924467
20-TWC-15-89	LASS		0.281154	2.4967e-05	0.000842993	0.000106539	0.0307951	0.00333061	1.46695	4.01565e-05	1.8883	0.000104929		-3.13755	0.882898
20-TWC-15-90	LASS		0.281211	2.57125e-05	0.00124048	0.000179549	0.0415297	0.00586968	1.46692	4.15269e-05	1.88825	8.22281e-05		-1.77586	0.909261
20-TWC-15-94	LASS		0.281311	2.78293e-05	0.00171426	0.00014376	0.0541017	0.00390093	1.46694	4.5159e-05	1.88821	0.000102223		0.991727	0.984115
20-TWC-15-96	LASS		0.281203	2.45994e-05	0.000702241	0.000177946	0.0221858	0.0043296	1.46698	4.38942e-05	1.88829	9.59939e-05		-1.15236	0.869898
20-TWC-15-97	LASS		0.281237	2.92109e-05	0.000827917	0.00024914	0.0255476	0.0064858	1.46697	4.43695e-05	1.88822	0.000124865		-0.167969	1.03297
20-TWC-15-98	LASS		0.281134	2.36405e-05	0.00018774	1.44861e-05	0.00797112	0.000548833	1.46693	4.84934e-05	1.88832	0.000109754		-2.76295	0.835989
20-TWC-15-103	LASS		0.281224	1.81649e-05	0.00105208	0.000155645	0.0338301	0.00435298	1.46696	3.91253e-05	1.88831	7.50321e-05		-0.998715	0.642356
20-TWC-15-104	LASS		0.281173	1.90192e-05	0.000375722	2.2888e-05	0.0147062	0.000970252	1.46697	2.93648e-05	1.88837	6.72702e-05		-1.68615	0.672568
20-TWC-15-106	LASS		0.281312	2.24154e-05	0.00174026	0.000184097	0.0563496	0.00468797	1.46693	4.19144e-05	1.88829	0.000127072		0.972061	0.792666
20-TWC-15-111	LASS		0.281191	2.32345e-05	0.000665245	0.000120968	0.0242737	0.00341332	1.46696	3.06825e-05	1.88847	8.61672e-05		-1.51951	0.821633
20-TWC-15-112	LASS		0.281255	3.48108e-05	0.00172796	8.47861e-05	0.0527988	0.00249959	1.46694	4.08698e-05	1.88833	0.0001195		-1.01108	1.231
20-TWC-15-113	LASS		0.28131	3.95652e-05	0.00212717	0.000348547	0.0750671	0.0117885	1.46693	4.79968e-05	1.88839	0.000111768		0.253423	1.39913
20-TWC-15-115	LASS		0.281211	2.74444e-05	0.00120781	8.63872e-05	0.0412928	0.00334905	1.46694	5.0303e-05	1.88831	0.000121351		-1.7167	0.970505
20-TWC-15-116	LASS		0.281157	1.63778e-05	0.000194802	7.85779e-06	0.0078356	0.000316188	1.46695	4.03027e-05	1.88845	8.18532e-05		-1.95547	0.57916
20-TWC-15-117	LASS		0.281249	2.54149e-05	0.00103852	0.000188021	0.0362819	0.00632818	1.46693	4.41799e-05	1.8883	0.00010902		-0.0940773	0.898736
20-TWC-15-119	LASS		0.281151	1.89359e-05	0.000254609	1.22121e-06	0.0093281	9.4832e-05	1.46722	4.31299e-05	1.8871	8.44407e-05		-2.26929	0.669623
20-TWC-15-121	LASS		0.281203	3.76563e-05	0.00189854	0.00017977	0.0584329	0.00629304	1.46716	4.0943e-05	1.88687	0.000125313		-3.18009	1.33162
20-TWC-15-129	LASS		0.281123	2.4207e-05	0.000241915	1.05976e-05	0.00872458	0.000356659	1.46724	3.27782e-05	1.88711	7.97553e-05		-3.2486	0.856022
20-TWC-15-132	LASS		0.28116	2.18265e-05	0.000368154	6.10863e-05	0.0127388	0.00163183	1.46722	3.71831e-05	1.88717	0.000110699		-2.12479	0.771842
20-TWC-15-143	LASS		0.281196	2.15847e-05	0.000704802	5.11027e-05	0.0210019	0.00107466	1.46725	3.47981e-05	1.88721	8.88685e-05		-1.42995	0.763292
20-TWC-15-158	LASS		0.281156	2.15509e-05	0.000789779	0.000213046	0.022844	0.0055332	1.46724	3.90288e-05	1.88707	8.6895e-05		-2.98243	0.762094
20-TWC-15-159	LASS		0.281159	2.78829e-05	0.000942236	0.000234547	0.0290414	0.0068656	1.46719	4.29858e-05	1.8871	0.000108146		-3.11031	0.986011
20-TWC-15-160	LASS		0.281155	1.48452e-05	0.000612767	0.000198711	0.0190638	0.00483085	1.46722	3.73965e-05	1.88716	8.71066e-05		-2.7277	0.524964
												Mean value ± 2sd		-1.57891	2.47412
20-TWC-10 amphibolite Greenhorn Range
Assigned age: 1765 Ma
20-TWC-10-53	LASS		0.281257	1.93889e-05	9.23233e-05	3.12258e-06	0.00332501	0.00010387	1.46706	4.49768e-05	1.88772	9.66538e-05		-14.3967	0.685642
20-TWC-10-54	LASS		0.281269	1.93335e-05	6.55874e-06	4.76489e-07	0.000352693	1.94971e-05	1.46703	4.0202e-05	1.88772	7.28278e-05		-13.8637	0.683682
20-TWC-10-55	LASS		0.28126	1.86789e-05	4.32589e-06	1.58002e-07	0.00024771	1.42207e-05	1.46706	3.16067e-05	1.88778	6.21955e-05		-14.1876	0.660535
20-TWC-10-56	LASS		0.281269	2.14141e-05	9.76639e-06	2.60126e-07	0.000325471	1.65294e-05	1.46699	4.18e-05	1.88764	0.000119546		-13.8778	0.757258
20-TWC-10-57	LASS		0.28128	2.10383e-05	2.1982e-06	1.39118e-07	0.000122722	1.14298e-05	1.46704	3.68417e-05	1.88771	0.000103598		-13.4847	0.743968
20-TWC-10-58	LASS		0.28128	1.81231e-05	2.56444e-06	6.17487e-07	0.00013507	2.45169e-05	1.46707	3.93375e-05	1.88772	9.58479e-05		-13.4572	0.640879
20-TWC-10-59	LASS		0.281267	1.86453e-05	1.47171e-06	1.21974e-07	8.31408e-05	1.06023e-05	1.46705	4.54028e-05	1.8877	8.07131e-05		-13.9386	0.659346
20-TWC-10-60	LASS		0.281258	2.30553e-05	1.12836e-06	1.14535e-07	6.80627e-05	1.04261e-05	1.46708	3.81295e-05	1.88779	0.000105105		-14.2493	0.815295
20-TWC-10-61	LASS		0.281266	2.29557e-05	1.53163e-06	1.97303e-07	9.41262e-05	1.51629e-05	1.46705	4.5969e-05	1.88781	9.36802e-05		-13.9787	0.811772
20-TWC-10-62	LASS		0.281288	1.73769e-05	8.49687e-06	2.16689e-06	0.000327257	7.04032e-05	1.46707	4.2008e-05	1.88775	0.000107696		-13.1815	0.614491
20-TWC-10-63	LASS		0.281267	1.79766e-05	1.24886e-05	3.92955e-07	0.000584293	2.22065e-05	1.46703	4.35279e-05	1.88776	8.97924e-05		-13.9441	0.635697
20-TWC-10-64	LASS		0.281286	1.79004e-05	1.27472e-05	1.50622e-07	0.000650135	1.313e-05	1.46706	3.50644e-05	1.88769	8.8044e-05		-13.2825	0.633005
20-TWC-10-65	LASS		0.281271	2.26206e-05	3.61222e-06	2.28264e-07	0.000205137	1.47034e-05	1.46704	4.06559e-05	1.88774	7.81238e-05		-13.7938	0.799923
20-TWC-10-66	LASS		0.281289	1.55288e-05	1.3812e-05	7.70917e-07	0.000608558	3.95381e-05	1.46707	4.57978e-05	1.88774	9.63587e-05		-13.1767	0.549138
20-TWC-10-67	LASS		0.281276	2.44296e-05	2.06619e-05	4.49498e-06	0.000982445	0.000172507	1.46706	4.59992e-05	1.88769	9.87216e-05		-13.6462	0.863892
20-TWC-10-68	LASS		0.281275	2.28261e-05	0.000137558	9.11308e-06	0.00542542	0.000525815	1.4671	5.17267e-05	1.88783	0.000107593		-13.8164	0.807189
20-TWC-10-69	LASS		0.28128	2.11183e-05	7.07151e-06	1.92865e-07	0.000342083	1.78961e-05	1.46709	4.22693e-05	1.88783	0.000121288		-13.4708	0.746797
20-TWC-10-70	LASS		0.281273	1.68654e-05	6.44959e-06	5.80383e-07	0.000286154	1.66734e-05	1.46705	4.54773e-05	1.88775	8.71137e-05		-13.7293	0.596402
20-TWC-10-71	LASS		0.281275	1.73527e-05	3.09739e-06	2.89304e-07	0.000176178	1.73881e-05	1.46707	4.17437e-05	1.88774	8.51854e-05		-13.6535	0.613635
20-TWC-10-72	LASS		0.281267	1.77988e-05	1.90766e-05	5.53686e-06	0.000905746	0.000216146	1.46699	3.58498e-05	1.88772	9.5515e-05		-13.9502	0.629411
20-TWC-10-73	LASS		0.281278	1.78049e-05	5.87272e-06	8.26577e-07	0.000299531	5.06631e-05	1.46706	4.12054e-05	1.88774	0.000103766		-13.5351	0.629626
20-TWC-10-74	LASS		0.281277	1.59254e-05	3.01619e-06	2.03786e-07	0.000188732	1.51683e-05	1.46703	2.90797e-05	1.88771	0.000112069		-13.5644	0.563161
20-TWC-10-75	LASS		0.281293	1.84782e-05	7.06535e-05	9.79637e-06	0.00231743	0.00026026	1.46705	4.0655e-05	1.88777	7.91347e-05		-13.0923	0.653436
20-TWC-10-76	LASS		0.281266	2.34495e-05	2.02694e-06	1.52162e-07	0.00012515	1.25548e-05	1.46706	4.54676e-05	1.88779	0.000111066		-13.9681	0.829234
20-TWC-10-77	LASS		0.281282	2.1746e-05	3.90719e-05	1.83596e-06	0.00193958	0.000108965	1.46703	3.65199e-05	1.88778	9.9417e-05		-13.4408	0.768995
20-TWC-10-78	LASS		0.281267	2.31299e-05	3.38714e-05	3.40697e-06	0.00115872	0.000128467	1.46704	4.753e-05	1.8878	9.71016e-05		-13.9685	0.817933
20-TWC-10-79	LASS		0.281262	1.79684e-05	1.81911e-06	2.78013e-07	9.76303e-05	1.50234e-05	1.46705	3.83651e-05	1.88777	8.96066e-05		-14.12	0.63541
20-TWC-10-80	LASS		0.281267	2.10779e-05	8.26873e-06	9.41302e-07	0.000424939	4.42439e-05	1.46702	3.69353e-05	1.88776	9.76162e-05		-13.9437	0.74537
20-TWC-10-81	LASS		0.281274	2.20081e-05	4.40851e-06	1.33832e-07	0.000234595	1.11072e-05	1.46706	4.01259e-05	1.88779	8.68834e-05		-13.6941	0.778261
20-TWC-10-82	LASS		0.281287	2.08746e-05	4.43041e-05	1.18297e-05	0.00160545	0.000377762	1.46706	4.01079e-05	1.88777	9.41934e-05		-13.2578	0.738178
												Mean value ± 2sd		-13.7221	0.673224
*Ratios and associated uncertainties were reduced using the in-house customized Hf isotope data reduction scheme of the Iolite 4.7.1 program.
†The initial Hf isotope compositions were calculated using the CHUR values of 176Hf/177Hf = 0.282785 and 176Lu/177Hf = 0.0336 (Bouvier et al., 2008), and a 176Lu decay constant of 1.867×10-11 yr-1 (Söderlund et al., 2004).

## Sheet: Table S6
TABLE S6. WHOLE-ROCK MAJOR- AND TRACE-ELEMENT COMPOSITIONS
Sample	20-TWC-17	20-TWC-27	HM11-9	20-TWC-26	20-TWC-12	20-TWC-15	20-TWC-10
Rock type	Amphibolite	Quartzofeldspathic gneiss	Granitic gneiss	Gedrite geniss	Amphibolite	Leucogeniss	Amphibolite
Major (wt%)
SiO2	48.9419	71.4729	73.2439	50.9503	63.7471	62.1475	59.0966
TiO2	1.77245	0.971835	0.352152	1.61986	1.14791	0.741441	0.6211
Al2O3	14.888	9.92699	12.5126	14.8326	14.3512	14.5587	15.0894
Fe2O3t	15.415	9.35142	3.04887	21.1373	9.67222	15.9077	8.3105
MnO	0.252803	0.123715	0.0652245	0.291651	0.242305	0.369862	0.1093
MgO	7.03041	0.094671	0.826813	7.66433	1.29203	1.7375	4.0626
CaO	8.86952	1.43715	0.912238	0.964599	3.90151	1.38875	8.2235
Na2O	1.65589	2.22889	2.2319	1.39836	2.53431	1.16392	3.0679
K2O	0.270579	3.78543	5.18851	0.776965	1.89081	2.01212	0.6969
P2O5	0.132108	0.034572	0.079194	0.128439	0.394462	0.08787	0.0872
Total	99.2287	99.4276	98.4614	99.7643	99.1739	100.115	99.365
Trace (ppm)
Sc	47.6987	5.81654	10.2729	56.6861	26.0484	49.4217	28.2866
Rb	3.07473	89.5632	100.485	18.9052	112.34	59.9258	16.7014
Sr	97.1827	97.196	189.914	16.2055	120.946	58.272	276.9
Y	34.0152	67.3769	24.9328	75.4188	129.571	801.664	12.6526
Zr	138.553	486.295	254.792	177.612	317.482	478.583	91.2052
Nb	10.9577	28.6236	7.03445	10.152	28.1736	67.4492	3.57744
Cs	0.133675	0.0895	0.724544	0.518124	1.7771	0.155343	0.533108
Ba	24.2925	1178.94	1175.66	85.7083	577.619	1028.22	203.893
La	15.8931	45.3717	64.5262	21.5567	42.1838	353.776	13.4316
Ce	35.4746	95.8669	128.452	41.9072	84.9746	705.946	25.491
Pr	4.77607	10.6952	14.998	5.03587	10.4845	84.502	3.13906
Nd	20.5545	40.4206	52.9097	19.4716	40.1681	311.564	12.2915
Sm	5.22265	9.04366	8.07483	4.61712	9.29352	62.3332	2.60855
Eu	1.66441	2.09097	1.43368	1.02771	2.37817	2.78573	0.903683
Gd	5.78189	9.70262	5.27138	6.39682	12.4645	70.5127	2.63205
Tb	1.01939	1.79978	0.735023	1.48014	2.75615	15.7045	0.416731
Dy	6.22046	11.6162	4.39169	11.2925	19.7784	121.087	2.37891
Ho	1.27342	2.50422	0.953175	2.72498	4.59152	29.5931	0.454689
Er	3.50287	7.25766	2.76146	8.31461	13.7022	90.4904	1.22859
Tm	0.514332	1.13034	0.442331	1.33668	2.19021	14.5469	0.187519
Yb	3.27852	7.16936	2.85326	8.62769	13.7655	92.0971	1.1186
Lu	0.517752	1.14797	0.471854	1.35145	2.19496	14.6923	0.174463
Hf	3.77451	12.6696	6.94517	4.83593	7.67916	13.4939	2.38431
Ta	0.702294	1.65485	0.439356	0.761714	2.04376	3.40219	0.229937
Pb	5.73252	22.9156	40.3068	5.25007	12.149	37.2044	4.69398
Th	3.30264	11.4698	28.2151	7.85546	11.7706	95.9261	3.1039
U	0.764449	1.36947	1.03822	1.97173	3.00542	9.20922	0.422769
Eu/Eu*	0.921676	0.678142	0.630352	0.57806	0.675519	0.127988	1.04368
(La/Sm)N	1.96454	3.2388	5.15877	3.01407	2.93028	3.66397	3.32409
(Gd/Lu)N	1.38029	1.04467	1.38082	0.585042	0.701892	0.593199	1.86472
